# Supplementary material
Source: publisher figshare collection journal article supplement (https://tandf.figshare.com/ndownloader/files/33917244)
Supplement: Supplementary file 1 [file 33917244]

## Sheet: 1980s
Table S1. Models to predict the harvest of caribou in Newfoundland, 1980-1989. The regression coefficients are shown for each variable in the model. Variables not in the models appear as blank entries.
Harvest type	Intercept	Proportion of lichen cover	Proportion of lichen cover squared	Distance to cutblocks	Distance to cutblocks squared	Distance to power lines	Distance to power lines squared	Distance to towns	Distance to towns squared	ΔAIC	AIC weight	R²
Total harvest	-4.35307	0.24898		-0.302477	-0.412369			0.418203	-0.226531	0	0.675801	0.327392
Total harvest	-4.37612	0.286021		-0.421927	-0.596418					3.69443	0.106557	0.310037
Total harvest	-4.40387	0.158839	0.0778934	-0.294548	-0.436798			0.416367	-0.234021	4.55075	0.0694441	0.329377
Total harvest	-4.51511	0.318124		-0.402202	-0.453961			0.218782		5.27405	0.0483698	0.315191
Total harvest	-4.38579	0.255542		-0.29388	-0.384447	-0.0642334		0.461094	-0.23183	5.97133	0.034132	0.327918
Total harvest	-4.17848			-0.12379	-0.476357			0.407435	-0.302497	6.24742	0.029731	0.314171
Total harvest	-4.42779	0.209876	0.0682361	-0.416849	-0.616481					8.69391	0.00874903	0.311601
Total harvest	-4.36443	0.283217		-0.425577	-0.597657	0.0628801				9.56043	0.0056728	0.310688
Total harvest	-4.72865	0.289066		-0.409853				0.665631	-0.261334	9.69814	0.00529534	0.310543
Total harvest	-4.56137	0.245216	0.0646124	-0.397545	-0.475799			0.214793		10.4368	0.0036602	0.316572
Total harvest	-4.43348	0.166663	0.076436	-0.287057	-0.410432	-0.058833		0.455754	-0.238525	10.6026	0.00336896	0.329819
Total harvest	-4.53295	0.322494		-0.398703	-0.440706	-0.030647		0.237743		11.6407	0.00200476	0.315313
Total harvest	-4.75045	0.298579		-0.36879		-0.175311		0.737757	-0.266888	11.7255	0.00192156	0.315224
Total harvest	-4.43576	0.257071		-0.30327	-0.382619	-0.114851	0.0447894	0.474238	-0.234698	11.9893	0.00168412	0.328396
Total harvest	-4.18963			-0.11883	-0.465809	-0.0251756		0.424321	-0.305744	12.6496	0.00121057	0.314256
Total harvest	-4.41615	0.205951	0.0690543	-0.420381	-0.618245	0.0646215				14.5194	0.000475315	0.312293
Total harvest	-4.76545	0.245158	0.0389997	-0.410929				0.670761	-0.266647	15.6878	0.000265009	0.311063
Total harvest	-4.37576	0.283574		-0.428682	-0.598873	0.0516088	0.0109904			16.0159	0.000224911	0.310717
Total harvest	-4.50203	0.160309	0.0829718	-0.298622	-0.410337	-0.123841	0.0584348	0.472476	-0.243336	16.312	0.000193957	0.330611
Total harvest	-4.60406	0.207301				-0.227275		0.871321	-0.331088	16.5706	0.000170437	0.30326
Total harvest	-4.57679	0.249731	0.0640565	-0.394571	-0.463836	-0.0269068		0.231582		16.8298	0.000149717	0.316666
Total harvest	-4.28626			-0.220573	-0.628035					17.2714	0.000120058	0.288546
Total harvest	-4.55348	0.182344						0.795457	-0.334051	17.5626	0.000103787	0.29525
Total harvest	-4.79082	0.25133	0.0420289	-0.36987		-0.176458		0.743916	-0.272141	17.6404	9.98e-05	0.315819
Total harvest	-4.80167	0.299748		-0.377612		-0.228477	0.0484046	0.750152	-0.269756	17.6551	9.91e-05	0.315804
Total harvest	-4.56635	0.324186		-0.405898	-0.43996	-0.0620327	0.0286907	0.243958		17.9406	8.59e-05	0.315505
Total harvest	-4.22581			-0.124308	-0.46465	-0.0639053	0.0334958	0.434939	-0.308693	18.8692	5.4e-05	0.314532
Total harvest	-4.96034	0.371006		-0.532453				0.469464		19.3938	4.15e-05	0.293274
Total harvest	-4.51976							0.774757	-0.377225	19.4095	4.12e-05	0.286216
Total harvest	-4.55527					-0.18869		0.836676	-0.383489	20.5152	2.37e-05	0.292061
Total harvest	-4.43997	0.204107	0.0711805	-0.426399	-0.621264	0.0426978	0.0215945			20.8978	1.96e-05	0.312403
Total harvest	-4.60493			-0.224271				0.695972	-0.352436	20.9399	1.92e-05	0.291601
Total harvest	-4.98542	0.384733		-0.492598		-0.16522		0.535912		21.9109	1.18e-05	0.297547
Total harvest	-4.35236			-0.199977	-0.55808			0.111874		22.5161	8.72e-06	0.289892
Total harvest	-4.64132	0.163064	0.039792			-0.22802		0.877557	-0.336275	22.5379	8.63e-06	0.303809
Total harvest	-4.26976			-0.227101	-0.631538	0.0813516				22.7116	7.91e-06	0.28968
Total harvest	-4.62575	0.206496				-0.252565	0.0221752	0.878759	-0.333337	22.9357	7.07e-06	0.303385
Total harvest	-4.62315	0.247705	0.0675004	-0.40391	-0.46428	-0.0679621	0.0380417	0.239254		22.9958	6.86e-06	0.316998
Total harvest	-4.85669	0.244833	0.0486776	-0.380136		-0.238382	0.0565479	0.759429	-0.276531	23.3837	5.65e-06	0.316592
Total harvest	-4.587	0.141766	0.0365662					0.800609	-0.339319	23.606	5.06e-06	0.295724
Total harvest	-4.6183			-0.182839		-0.155812		0.761566	-0.363056	23.8526	4.47e-06	0.295458
Total harvest	-4.97718	0.353906	0.0157513	-0.533832				0.470816		25.7962	1.69e-06	0.293361
Total harvest	-4.5805					-0.218425	0.0256062	0.845747	-0.385881	26.8399	1e-06	0.292233
Total harvest	-5.01928	0.386217		-0.499129		-0.19753	0.0304762	0.541769		28.1848	5.12e-07	0.297772
Total harvest	-5.00741	0.362692	0.0203918	-0.494109		-0.166293		0.538335		28.2605	4.93e-07	0.29769
Total harvest	-4.32406			-0.209564	-0.57912	0.0520766		0.0823338		28.6537	4.05e-07	0.290267
Total harvest	-4.67328	0.157888	0.0433487			-0.261569	0.0294906	0.888009	-0.339894	28.8171	3.73e-07	0.304026
Total harvest	-4.26531			-0.226022	-0.630999	0.0859379	-0.00443364			29.1901	3.1e-07	0.289685
Total harvest	-4.65613			-0.18793		-0.197354	0.0366749	0.772343	-0.366044	30.0133	2.05e-07	0.295806
Total harvest	-5.04792	0.360949	0.0234264	-0.501543		-0.201887	0.0335273	0.545103		34.4931	2.19e-08	0.297959
Total harvest	-4.3253			-0.209776	-0.579117	0.0508762	0.00109159	0.0825508		35.1365	1.58e-08	0.290268
Total harvest	-4.86134	0.286808				-0.24389		0.665373		37.5235	4.8e-09	0.273409
Total harvest	-4.80906	0.253819						0.581284		39.5523	1.74e-09	0.26389
Total harvest	-4.84168	0.287009				-0.223301	-0.0185343	0.660729		43.9263	1.96e-10	0.273498
Total harvest	-4.87362	0.274393	0.0117471			-0.244604		0.667313		43.9616	1.92e-10	0.273459
Total harvest	-4.81355	0.249198	0.00434842					0.581807		46.0291	6.83e-11	0.263897
Total harvest	-4.90039			-0.325141				0.417788		46.298	5.97e-11	0.256258
Total harvest	-4.97389	0.316128		-0.774024						49.8175	1.03e-11	0.252245
Total harvest	-4.85375	0.276197	0.0102539			-0.22537	-0.017263	0.662736		50.3757	7.78e-12	0.273536
Total harvest	-4.80685							0.510481		50.4275	7.58e-12	0.244091
Total harvest	-4.91679			-0.292441		-0.114742		0.461057		50.8107	6.26e-12	0.258496
Total harvest	-4.84448					-0.171277		0.561846		52.4159	2.8e-12	0.249268
Total harvest	-4.96332	0.316245		-0.773479		0.0528003				55.8569	5.02e-13	0.252752
Total harvest	-4.96981	0.320261	-0.00383032	-0.773426						56.2958	4.03e-13	0.252251
Total harvest	-4.91449			-0.292103		-0.112491	-0.00208896	0.460628		57.2927	2.45e-13	0.258497
Total harvest	-4.8191					-0.144495	-0.0238992	0.555422		58.7677	1.17e-13	0.249419
Total harvest	-4.93378	0.314654		-0.765774		0.078942	-0.0262578			62.1765	2.13e-14	0.252939
Total harvest	-4.9595	0.320127	-0.0036028	-0.772932		0.0527431				62.3358	1.97e-14	0.252757
Total harvest	-4.91988			-0.560882						67.3732	1.58e-15	0.224249
Total harvest	-4.92585	0.321557	-0.00646672	-0.764463		0.0798032	-0.027174			68.6462	8.38e-16	0.252955
Total harvest	-4.91011			-0.561751		0.0512391				73.4363	7.64e-17	0.224747
Total harvest	-4.85304			-0.54887		0.103407	-0.0511781			79.2967	4.08e-18	0.225485
Total harvest	-4.74642									92.3136	6.08e-21	0.186066
Total harvest	-4.74354	0.127075								94.5106	2.03e-21	0.191382
Total harvest	-4.73899					0.0376894				98.5947	2.63e-22	0.186317
Total harvest	-4.70721	0.165297	-0.0362019							100.55	9.9e-23	0.191931
Total harvest	-4.736	0.127049				0.0380513				100.791	8.78e-23	0.191633
Total harvest	-4.62217					0.151821	-0.112213			102.067	4.64e-23	0.190054
Total harvest	-4.61771	0.128395				0.152038	-0.113538			104.204	1.59e-23	0.195418
Total harvest	-4.70061	0.164552	-0.0355768			0.036564				106.847	4.25e-24	0.192161
Total harvest	-4.56566	0.177167	-0.046275			0.156486	-0.118975			109.982	8.86e-25	0.196285
Resident licence, male	-4.69833	0.260434		-0.499821	-0.580067					0	0.501002	0.234699
Resident licence, male	-4.85093	0.298254		-0.481744	-0.422666			0.223158		1.63916	0.22075	0.240347
Resident licence, male	-4.96451	0.318763		-0.46673	-0.343393	-0.192806		0.34392		4.15003	0.0629031	0.244947
Resident licence, male	-4.7561	0.171723	0.0767591	-0.491462	-0.603506					4.68136	0.0482276	0.236805
Resident licence, male	-4.76004	0.261837		-0.418334	-0.394302			0.338171	-0.125007	5.06496	0.0398105	0.243889
Resident licence, male	-4.70599	0.259964		-0.497959	-0.58234	-0.0498582				6.1393	0.0232653	0.235101
Resident licence, male	-5.30604	0.371688		-0.535096		-0.283944		0.56985		6.51257	0.0193042	0.234665
Resident licence, male	-4.90249	0.213031	0.0728717	-0.473761	-0.448422			0.218271		6.52844	0.0191517	0.242196
Resident licence, male	-4.87028	0.279725		-0.401372	-0.313169	-0.199042		0.466262	-0.131815	7.27384	0.0131931	0.248815
Resident licence, male	-4.61138			-0.307465	-0.614048					7.68158	0.0107598	0.217943
Resident licence, male	-5.15744	0.319586		-0.455782		-0.277731		0.687687	-0.159084	7.93674	0.00947108	0.240562
Resident licence, male	-5.00966	0.239019	0.0675764	-0.460069	-0.369282	-0.186794		0.335968		9.27343	0.00485446	0.246515
Resident licence, male	-4.81126	0.168984	0.0782778	-0.407689	-0.420424			0.336294	-0.131009	9.71201	0.00389855	0.246009
Resident licence, male	-5.25323	0.361093		-0.587201				0.453719		10.1935	0.00306442	0.222677
Resident licence, male	-4.93519	0.315345		-0.459208	-0.34492	-0.166525	-0.0253037	0.339796		10.5038	0.00262409	0.245096
Resident licence, male	-4.56958			-0.220049	-0.46978			0.324439	-0.200895	10.6948	0.00238507	0.229755
Resident licence, male	-4.76267	0.172306	0.0758231	-0.489909	-0.605206	-0.0463372				10.8642	0.00219139	0.237155
Resident licence, male	-5.10007	0.309688		-0.500603				0.57967	-0.164479	11.1348	0.00191408	0.229237
Resident licence, male	-4.91533	0.193102	0.0724719	-0.392563	-0.339647	-0.19232		0.460213	-0.136669	12.1952	0.00112639	0.250607
Resident licence, male	-4.65707	0.25452		-0.483114	-0.580448	-0.0042881	-0.0456388			12.1992	0.00112414	0.235596
Resident licence, male	-5.34219	0.334306	0.0336352	-0.535954		-0.284586		0.57366		12.6527	0.000896079	0.235066
Resident licence, male	-4.68731			-0.283466	-0.533169			0.121763		12.7285	0.000862741	0.219659
Resident licence, male	-5.28417	0.369387		-0.529576		-0.263846	-0.0202696	0.567764		12.9092	0.000788193	0.234766
Resident licence, male	-4.85896	0.278747		-0.398918	-0.314049	-0.187895	-0.0105444	0.4633	-0.13063	13.7341	0.000521828	0.248841
Resident licence, male	-4.6212			-0.306328	-0.615129	-0.053773				13.7661	0.000513532	0.21842
Resident licence, male	-5.20008	0.269847	0.0436266	-0.45512		-0.27786		0.694341	-0.163524	13.8439	0.00049395	0.241231
Resident licence, male	-4.64987			-0.19727	-0.40681	-0.161676		0.428656	-0.213003	14.3331	0.000386763	0.233098
Resident licence, male	-5.15372	0.319332		-0.454891		-0.273764	-0.00384573	0.686915	-0.158564	14.4168	0.000370919	0.240566
Resident licence, male	-4.99325	0.239175	0.066009	-0.456324	-0.369439	-0.173175	-0.0133136	0.334024		15.7219	0.000193137	0.246555
Resident licence, male	-5.28497	0.328347	0.0297767	-0.588423				0.456341		16.408	0.000137055	0.222997
Resident licence, male	-5.14007	0.262281	0.0419211	-0.500131				0.585714	-0.169501	17.0886	9.75e-05	0.22986
Resident licence, male	-4.72597	0.173324	0.0718064	-0.479959	-0.602723	-0.0153721	-0.0314694			17.1521	9.45e-05	0.237383
Resident licence, male	-4.76121			-0.265671	-0.482694	-0.132753		0.199386		17.3048	8.75e-05	0.22193
Resident licence, male	-4.96972	0.187994				-0.329473		0.847041	-0.250066	17.3855	8.41e-05	0.221834
Resident licence, male	-4.91997	0.192791	0.0730219	-0.393475	-0.339545	-0.1965	0.00404194	0.461246	-0.137181	18.675	4.41e-05	0.25061
Resident licence, male	-4.92895					-0.302299		0.817457	-0.293537	18.7199	4.31e-05	0.212477
Resident licence, male	-4.53922			-0.288488	-0.610563	0.0269343	-0.0798734			18.9179	3.91e-05	0.220009
Resident licence, male	-5.32458	0.3347	0.0318432	-0.531968		-0.270156	-0.0145415	0.571976		19.0926	3.58e-05	0.235117
Resident licence, male	-5.01544			-0.243224		-0.265797		0.72009	-0.262673	19.9196	2.37e-05	0.218813
Resident licence, male	-5.20614	0.269324	0.0443957	-0.456272		-0.283324	0.00539874	0.695543	-0.164187	20.3212	1.94e-05	0.241237
Resident licence, male	-4.61523			-0.192624	-0.409211	-0.123831	-0.034708	0.41755	-0.207309	20.565	1.71e-05	0.233393
Resident licence, male	-4.96773			-0.292529				0.614071	-0.260279	22.2945	7.22e-06	0.208161
Resident licence, male	-4.68238			-0.251754	-0.483882	-0.0575196	-0.0720982	0.190585		22.7127	5.86e-06	0.223209
Resident licence, male	-5.01386	0.137219	0.0457292			-0.329234		0.854067	-0.254622	23.2267	4.53e-06	0.222598
Resident licence, male	-4.93516	0.188314				-0.288003	-0.0387881	0.83526	-0.243809	23.5408	3.87e-06	0.222224
Resident licence, male	-4.85219							0.717372	-0.300182	23.6405	3.68e-06	0.198625
Resident licence, male	-4.87936	0.164139						0.737221	-0.266206	24.045	3.01e-06	0.206038
Resident licence, male	-5.17786	0.240897				-0.360166		0.6946		24.5956	2.29e-06	0.20537
Resident licence, male	-4.89324					-0.258576	-0.0401874	0.804509	-0.286901	24.8499	2.01e-06	0.212902
Resident licence, male	-4.9905			-0.239949		-0.237431	-0.0267962	0.713073	-0.258682	26.2462	1e-06	0.219
Resident licence, male	-5.24764			-0.326684		-0.264549		0.510131		28.5577	3.15e-07	0.200541
Resident licence, male	-4.98285	0.142514	0.0413116			-0.297134	-0.0301577	0.844193	-0.24922	29.5181	1.95e-07	0.222826
Resident licence, male	-5.09312	0.23843				-0.272655	-0.0825387	0.679969		29.6179	1.86e-07	0.207143
Resident licence, male	-4.92067	0.115971	0.0439122					0.743627	-0.27139	29.9355	1.58e-07	0.206758
Resident licence, male	-5.21096	0.206874	0.0315202			-0.360907		0.69947		30.7717	1.04e-07	0.205743
Resident licence, male	-5.19864			-0.381457				0.405667		30.8655	9.94e-08	0.189722
Resident licence, male	-5.16822					-0.320746		0.616342		31.8123	6.19e-08	0.188549
Resident licence, male	-5.09265	0.213656						0.56493		33.6914	2.42e-08	0.186214
Resident licence, male	-5.17216			-0.314661		-0.191689	-0.0712	0.502289		33.9668	2.11e-08	0.201853
Resident licence, male	-5.12005	0.215086	0.0218848			-0.277317	-0.0787332	0.683968		35.9575	7.79e-09	0.207317
Resident licence, male	-5.06926					-0.217663	-0.0967022	0.599491		36.2972	6.58e-09	0.191024
Resident licence, male	-5.2643	0.304417		-0.820139						37.3357	3.91e-09	0.181666
Resident licence, male	-5.09169							0.508218		38.1177	2.65e-09	0.172525
Resident licence, male	-5.11844	0.187095	0.0248928					0.568204		39.9825	1.04e-09	0.186453
Resident licence, male	-5.26989	0.303211		-0.821542		-0.0246578				43.7323	1.6e-10	0.181775
Resident licence, male	-5.27442	0.29415	0.00941421	-0.821568						43.7912	1.55e-10	0.181701
Resident licence, male	-5.21048	0.295784		-0.806011		0.0280744	-0.0545747			49.5783	8.59e-12	0.182571
Resident licence, male	-5.21464			-0.613058						50.0704	6.72e-12	0.157263
Resident licence, male	-5.2795	0.293291	0.00906262	-0.822676		-0.0242941				50.1899	6.33e-12	0.181806
Resident licence, male	-5.2128	0.29392	0.00174495	-0.806597		0.0278154	-0.0542648			56.0606	3.36e-13	0.182572
Resident licence, male	-5.22525			-0.616319		-0.0468124				56.2429	3.07e-13	0.157663
Resident licence, male	-5.12138			-0.598292		0.0502272	-0.0971365			60.6495	3.39e-14	0.160333
Resident licence, male	-5.02621									78.2486	5.11e-18	0.111394
Resident licence, male	-5.02349	0.0880525								82.9204	4.94e-19	0.113851
Resident licence, male	-5.03384					-0.0376154				84.5494	2.19e-19	0.111641
Resident licence, male	-4.88036					0.112041	-0.151298			86.0253	1.05e-19	0.118417
Resident licence, male	-5.00245	0.110394	-0.0208466							89.2639	2.07e-20	0.114041
Resident licence, male	-5.02977	0.0867059				-0.0306608				89.2859	2.05e-20	0.114011
Resident licence, male	-4.88141	0.0785359				0.112757	-0.146602			91.1007	8.27e-21	0.120313
Resident licence, male	-5.00824	0.109803	-0.0215791			-0.0319793				95.6192	8.64e-22	0.114214
Resident licence, male	-4.8354	0.120256	-0.0393852			0.11717	-0.152998			97.1021	4.12e-22	0.12096
Resident licence, female	0.374794	0.374794		-0.384083	-0.803608					0	0.532545	0.264229
Resident licence, female	0.400582	0.400582		-0.360826	-0.642051			0.203967		4.25941	0.0633049	0.266727
Resident licence, female	0.340286	0.340286				-0.489434		0.980627	-0.2454	5.22997	0.0389657	0.265638
Resident licence, female	0.423064	0.423064		-0.309339	-0.46918	-0.340092		0.428939		5.37843	0.036178	0.272717
Resident licence, female	0.371074	0.371074		-0.369497	-0.80373	-0.123425				5.44852	0.0349321	0.265392
Resident licence, female	0.392692	0.392692				-0.538101		0.817012		5.84004	0.0287216	0.25763
Resident licence, female	0.403659	0.403659	-0.0247639	-0.384175	-0.795539					6.38238	0.0218998	0.264343
Resident licence, female	0.471638	0.471638		-0.352492		-0.491		0.74453		6.44542	0.0212202	0.264272
Resident licence, female	0.360008	0.360008		-0.287056	-0.586503			0.356567	-0.142364	8.72541	0.00678666	0.268985
Resident licence, female				-0.117865	-0.797914					9.09812	0.00563281	0.24649
Resident licence, female	0.409691	0.409691		-0.252682		-0.465627		0.893576	-0.191066	9.11499	0.00558549	0.268549
Resident licence, female	0.381915	0.381915		-0.238105	-0.418076	-0.338728		0.574782	-0.140228	9.90473	0.00376332	0.274889
Resident licence, female	0.43944	0.43944	-0.0325885	-0.360797	-0.628489			0.208074		10.568	0.00270112	0.266923
Resident licence, female	0.417566	0.417566	-0.0640668			-0.487993		0.968896	-0.236319	10.9983	0.00217823	0.26644
Resident licence, female	0.357471	0.357471		-0.339997	-0.809873	-0.050596	-0.0964352			11.0513	0.0021213	0.266381
Resident licence, female	0.336995	0.336995				-0.429196	-0.0813136	0.974684	-0.241845	11.0602	0.00211186	0.266371
Resident licence, female	0.491488	0.491488	-0.0840724			-0.533713		0.80764		11.0627	0.00210923	0.259059
Resident licence, female	0.410664	0.410664		-0.285378	-0.480994	-0.276871	-0.0838483	0.422962		11.2179	0.00195174	0.273432
Resident licence, female	0.386817	0.386817				-0.465623	-0.0985607	0.814488		11.3506	0.00182639	0.258733
Resident licence, female	0.476664	0.476664	-0.044335	-0.309658	-0.449331	-0.344962		0.437077		11.5357	0.00166498	0.273079
Resident licence, female	0.568565	0.568565	-0.0824805	-0.351218		-0.487277		0.736235		11.7397	0.00150356	0.265608
Resident licence, female	0.402542	0.402542	-0.0270575	-0.369486	-0.794936	-0.124733				11.8108	0.00145105	0.265528
Resident licence, female	0.464624	0.464624		-0.337833		-0.451876	-0.056362	0.746097		12.6238	0.000966325	0.264615
Resident licence, female	0.301414	0.301414						0.85115	-0.299588	12.7103	0.000925442	0.24979
Resident licence, female						-0.426988		0.928143	-0.325913	13.069	0.000773502	0.249379
Resident licence, female				-0.106451	-0.797646	-0.140343				14.245	0.000429621	0.248028
Resident licence, female	0.458175	0.458175		-0.44329				0.552757		14.2715	0.000423965	0.247997
Resident licence, female				-0.0154441	-0.621324			0.375822	-0.249773	14.7858	0.000327838	0.254829
Resident licence, female	0.49149	0.49149	-0.0670427	-0.255871		-0.464174		0.880158	-0.180839	14.8261	0.000321297	0.269412
Resident licence, female	0.388213	0.388213		-0.318718				0.746768	-0.230057	15.0813	0.000282808	0.254492
Resident licence, female				-0.0999426	-0.727374			0.0935372		15.0988	0.000280347	0.247045
Resident licence, female	0.389418	0.389418	-0.0241004	-0.288161	-0.577314			0.357195	-0.139725	15.1149	0.000278098	0.26909
Resident licence, female	0.403095	0.403095		-0.238382		-0.425884	-0.0559977	0.894618	-0.191715	15.2981	0.00025376	0.268885
Resident licence, female	0.371015	0.371015		-0.2163	-0.429932	-0.27772	-0.0800067	0.566965	-0.139191	15.7988	0.000197551	0.275542
Resident licence, female	0.426884	0.426884	-0.0362956	-0.239994	-0.402906	-0.342886		0.578154	-0.136376	16.1718	0.00016394	0.275129
Resident licence, female	0.499072	0.499072	-0.0963458			-0.446171	-0.1164	0.802384		16.2175	0.000160244	0.260563
Resident licence, female	0.427832	0.427832	-0.0758704			-0.414728	-0.0975276	0.959481	-0.230794	16.567	0.000134547	0.267465
Resident licence, female	0.35741	0.35741						0.63004		17.1525	0.0001004	0.237152
Resident licence, female	0.473511	0.473511	-0.0529669	-0.283315	-0.45839	-0.275482	-0.0926888	0.431722		17.2442	9.59e-05	0.273939
Resident licence, female	0.400542	0.400542	-0.0377487	-0.337932	-0.797686	-0.0467566	-0.103361			17.3028	9.31e-05	0.26664
Resident licence, female				0.0362225	-0.489347	-0.284666		0.555895	-0.256175	17.4422	8.69e-05	0.259177
Resident licence, female								0.819688	-0.362384	17.5857	8.08e-05	0.236647
Resident licence, female	0.568776	0.568776	-0.0904218	-0.331826		-0.434764	-0.0739892	0.736902		17.7098	7.6e-05	0.266184
Resident licence, female				-0.0520758	-0.603482	-0.267994		0.260557		18.1462	6.11e-05	0.25099
Resident licence, female				-0.0763789	-0.810341	-0.0186455	-0.159961			18.2605	5.77e-05	0.250859
Resident licence, female	0.382594	0.382594	-0.0681326					0.839796	-0.289176	18.3874	5.41e-05	0.250714
Resident licence, female						-0.351308	-0.103839	0.920872	-0.319727	18.479	5.17e-05	0.250609
Resident licence, female	0.563333	0.563333	-0.0906246	-0.439893				0.546666		19.3206	3.4e-05	0.249644
Resident licence, female				0.0240485		-0.430606		0.937988	-0.329784	19.5223	3.07e-05	0.249413
Resident licence, female						-0.474383		0.695715		20.0775	2.33e-05	0.233733
Resident licence, female	0.472672	0.472672	-0.070356	-0.320651				0.733911	-0.218702	20.7196	1.69e-05	0.255455
Resident licence, female	0.493117	0.493117	-0.0753808	-0.237621		-0.412465	-0.0718378	0.879805	-0.180757	20.8283	1.6e-05	0.269949
Resident licence, female	0.425982	0.425982	-0.0452747	-0.216309	-0.411985	-0.276217	-0.0882574	0.570499	-0.134586	21.952	9.11e-06	0.275908
Resident licence, female	0.468359	0.468359	-0.0951584					0.622814		22.0127	8.84e-06	0.239043
Resident licence, female				-0.0236208	-0.619419	-0.151374	-0.159737	0.259373		22.2238	7.95e-06	0.25374
Resident licence, female				0.056688	-0.507529	-0.182763	-0.134233	0.540699	-0.247515	22.2298	7.93e-06	0.261095
Resident licence, female				-0.0534466				0.799781	-0.353335	23.9277	3.39e-06	0.236812
Resident licence, female						-0.375012	-0.139463	0.696205		24.6023	2.42e-06	0.236024
Resident licence, female				0.0399329		-0.355036	-0.106719	0.936837	-0.325986	24.8825	2.1e-06	0.2507
Resident licence, female				-0.0993192		-0.457436		0.666031		26.0174	1.19e-06	0.234369
Resident licence, female								0.541945		27.965	4.51e-07	0.216709
Resident licence, female				-0.07714		-0.367402	-0.132491	0.673528		30.7674	1.11e-07	0.236395
Resident licence, female				-0.190256				0.494303		32.4194	4.86e-08	0.219135
Resident licence, female	0.396665	0.396665		-0.651612						36.9654	5.01e-09	0.213688
Resident licence, female	0.523294	0.523294	-0.112626	-0.641454						41.1547	6.16e-10	0.216441
Resident licence, female	0.39127	0.39127		-0.642521		-0.120172				42.3482	3.39e-10	0.21501
Resident licence, female	0.519549	0.519549	-0.113702	-0.632105		-0.123749				46.483	4.29e-11	0.217824
Resident licence, female	0.382915	0.382915		-0.624165		-0.0715129	-0.0625882			48.4097	1.64e-11	0.215516
Resident licence, female				-0.414541						49.3017	1.05e-11	0.190733
Resident licence, female	0.237544	0.237544								51.8886	2.88e-12	0.187525
Resident licence, female	0.521705	0.521705	-0.126104	-0.604095		-0.051959	-0.0919666			52.094	2.6e-12	0.218866
Resident licence, female										53.203	1.49e-12	0.17778
Resident licence, female				-0.408402		-0.140676				54.2316	8.91e-13	0.192652
Resident licence, female	0.381825	0.381825	-0.127948							55.2864	5.26e-13	0.191349
Resident licence, female	0.234569	0.234569				-0.149241				56.6998	2.6e-13	0.1896
Resident licence, female						-0.154782				57.8437	1.46e-13	0.180093
Resident licence, female				-0.381723		-0.0413041	-0.123417			58.9925	8.25e-14	0.194776
Resident licence, female	0.380861	0.380861	-0.129314			-0.154079				60.0142	4.95e-14	0.193517
Resident licence, female	0.22432	0.22432				-0.0279158	-0.150775			60.5864	3.72e-14	0.192811
Resident licence, female						-0.014654	-0.169909			60.9417	3.11e-14	0.184326
Resident licence, female	0.394627	0.394627	-0.151273			-0.00725017	-0.182077			62.8579	1.19e-14	0.197992
Resident licence	-4.53888	0.2675		-0.49275	-0.618063					0	0.539508	0.244204
Resident licence	-4.69211	0.304695		-0.473585	-0.460661			0.223328		1.91166	0.207437	0.249468
Resident licence	-4.81369	0.325917		-0.458025	-0.376076	-0.201732		0.349573		4.2796	0.0634885	0.254176
Resident licence	-4.59123	0.186776	0.0695682	-0.484285	-0.63884					5.09412	0.0422498	0.245807
Resident licence	-4.59833	0.267537		-0.406976	-0.430026			0.34265	-0.130489	5.29052	0.0382981	0.253022
Resident licence	-4.54816	0.266974		-0.490748	-0.6204	-0.0574751				6.05159	0.0261766	0.244702
Resident licence	-4.73878	0.227532	0.0657704	-0.46559	-0.483318			0.219064		7.17486	0.0149279	0.250867
Resident licence	-4.71639	0.286024		-0.389657	-0.343946	-0.207193		0.475321	-0.136928	7.38806	0.0134184	0.258014
Resident licence	-4.44721			-0.295648	-0.655737					7.64407	0.0118062	0.2277
Resident licence	-5.18902	0.383908		-0.531593		-0.305271		0.59808		7.74737	0.0112119	0.242741
Resident licence	-5.03183	0.329482		-0.447482		-0.296375		0.719946	-0.168037	8.97069	0.00608188	0.248807
Resident licence	-4.85409	0.254507	0.0603182	-0.451369	-0.398616	-0.196342		0.342693		9.74539	0.0041287	0.255335
Resident licence	-4.64513	0.183729	0.07061	-0.396727	-0.452968			0.340535	-0.135353	10.368	0.00302423	0.254626
Resident licence	-4.78104	0.322065		-0.449488	-0.377899	-0.172808	-0.028128	0.344961		10.6116	0.0026774	0.254348
Resident licence	-4.40286			-0.204512	-0.508001			0.329114	-0.208063	10.784	0.0024563	0.239217
Resident licence	-4.59931	0.187476	0.0684742	-0.482614	-0.640586	-0.0542282				11.1889	0.0020061	0.246255
Resident licence	-4.4961	0.260976		-0.47455	-0.61856	-0.00967085	-0.0485395			12.0824	0.00128333	0.245224
Resident licence	-5.13017	0.373814		-0.588176				0.473969		12.3942	0.00109806	0.229744
Resident licence	-4.75704	0.208758	0.0645909	-0.381245	-0.366976	-0.201113		0.469594	-0.140743	12.7047	0.000940165	0.259337
Resident licence	-4.52316			-0.271888	-0.575338			0.120902		12.8015	0.000895734	0.229264
Resident licence	-4.96652	0.319659		-0.494577				0.60708	-0.17616	12.9316	0.000839337	0.236715
Resident licence	-4.45892			-0.2943	-0.656551	-0.0613144				13.6385	0.000589448	0.228277
Resident licence	-4.70188	0.284724		-0.386425	-0.345123	-0.193114	-0.0134597	0.471594	-0.135468	13.8359	0.000534048	0.258055
Resident licence	-5.21533	0.356529	0.0245393	-0.532093		-0.305717		0.600742		14.0604	0.000477342	0.242938
Resident licence	-5.16555	0.381387		-0.525603		-0.28382	-0.021856	0.595843		14.1358	0.000459683	0.242851
Resident licence	-4.48911			-0.180385	-0.440639	-0.169246		0.437907	-0.220492	14.309	0.000421533	0.24265
Resident licence	-5.06526	0.29038	0.0342221	-0.446596		-0.296388		0.724776	-0.171312	15.1214	0.000280826	0.249189
Resident licence	-5.02661	0.329074		-0.446321		-0.291103	-0.00529599	0.718898	-0.167526	15.4479	0.000238527	0.248814
Resident licence	-4.83237	0.254707	0.0582206	-0.446328	-0.398912	-0.178545	-0.0175698	0.340112		16.1714	0.000166118	0.2554
Resident licence	-4.84761	0.200971				-0.346346		0.875868	-0.257414	16.8034	0.000121114	0.232182
Resident licence	-4.60312			-0.252544	-0.520635	-0.140752		0.203197		17.2523	9.68e-05	0.231655
Resident licence	-4.55731	0.188552	0.06384	-0.471042	-0.6379	-0.0192947	-0.0359584			17.4311	8.85e-05	0.246532
Resident licence	-4.37204			-0.274976	-0.651637	0.0235313	-0.0849264			18.6981	4.7e-05	0.229955
Resident licence	-4.80426					-0.318126		0.845219	-0.304069	18.746	4.59e-05	0.222226
Resident licence	-5.15144	0.351741	0.0200166	-0.58881				0.475623		18.7638	4.54e-05	0.229877
Resident licence	-4.99729	0.283111	0.0322843	-0.493888				0.611331	-0.179887	19.1205	3.8e-05	0.237058
Resident licence	-4.75625	0.208805	0.0645107	-0.38114	-0.367022	-0.200386	-0.000687719	0.469371	-0.140651	19.1877	3.68e-05	0.259337
Resident licence	-5.19364	0.357073	0.0222369	-0.527		-0.288161	-0.0178595	0.598715		20.482	1.92e-05	0.243009
Resident licence	-4.44983			-0.174952	-0.443408	-0.126822	-0.0393398	0.425426	-0.214128	20.4861	1.92e-05	0.243005
Resident licence	-4.88416			-0.225037		-0.284777		0.755896	-0.275544	21.0057	1.48e-05	0.227233
Resident licence	-5.06723	0.290221	0.0344706	-0.446984		-0.298147	0.0017517	0.72515	-0.171517	21.6039	1.1e-05	0.249189
Resident licence	-4.51896			-0.237332	-0.521973	-0.0610902	-0.0770737	0.19364		22.5732	6.77e-06	0.233019
Resident licence	-4.88379	0.159409	0.0373917			-0.345991		0.881074	-0.260904	22.8839	5.79e-06	0.232655
Resident licence	-4.81175	0.20115				-0.303798	-0.0402875	0.863855	-0.251104	22.9508	5.6e-06	0.232576
Resident licence	-5.06216	0.254763				-0.381541		0.722875		23.8416	3.59e-06	0.216143
Resident licence	-4.74892	0.17696						0.762856	-0.276855	24.0942	3.16e-06	0.21584
Resident licence	-4.82992			-0.277571				0.64437	-0.274952	24.1812	3.03e-06	0.215736
Resident licence	-4.72032							0.741713	-0.313058	24.2622	2.91e-06	0.207824
Resident licence	-4.76621					-0.271911	-0.0429234	0.831558	-0.297098	24.847	2.17e-06	0.222681
Resident licence	-4.85566			-0.221233		-0.252628	-0.0306597	0.747929	-0.27108	27.2948	6.38e-07	0.227462
Resident licence	-4.97663	0.252141				-0.293608	-0.0836747	0.707974		28.9056	2.85e-07	0.217842
Resident licence	-4.84923	0.16521	0.0324123			-0.310727	-0.0335368	0.870362	-0.255104	29.1421	2.53e-07	0.232919
Resident licence	-5.12788			-0.312162		-0.287174		0.540697		30.0082	1.64e-07	0.208717
Resident licence	-5.08733	0.228786	0.0240072			-0.38203		0.726403		30.1578	1.53e-07	0.216343
Resident licence	-4.78246	0.137953	0.0355758					0.767518	-0.280882	30.2121	1.48e-07	0.216278
Resident licence	-5.05233					-0.341049		0.64175		31.8046	6.69e-08	0.198635
Resident licence	-5.07326			-0.372274				0.427878		33.3631	3.07e-08	0.196724
Resident licence	-4.97005	0.227255						0.586755		33.9384	2.3e-08	0.196017
Resident licence	-4.9936	0.237392	0.0137928			-0.29651	-0.0812497	0.710404		35.3353	1.15e-08	0.217906
Resident licence	-5.04768			-0.299417		-0.209954	-0.075924	0.531938		35.34	1.14e-08	0.210108
Resident licence	-4.95064					-0.235425	-0.0997143	0.62398		36.2832	7.13e-09	0.201088
Resident licence	-4.96926							0.527313		39.0571	1.78e-09	0.181627
Resident licence	-4.98748	0.20927	0.0168502					0.588841		40.3389	9.39e-10	0.196118
Resident licence	-5.13818	0.318149		-0.837178						40.5265	8.55e-10	0.187877
Resident licence	-5.14596	0.316408		-0.839256		-0.033698				46.8574	3.61e-11	0.188066
Resident licence	-5.13834	0.318008	0.000135197	-0.837242						47.0095	3.34e-11	0.187877
Resident licence	-5.08465	0.308183		-0.823023		0.0199947	-0.0565685			52.6976	1.94e-12	0.188864
Resident licence	-5.14565	0.316755	-0.00031595	-0.839276		-0.0337343				53.3405	1.41e-12	0.188066
Resident licence	-5.08649			-0.617689						53.6978	1.18e-12	0.1631
Resident licence	-5.07385	0.317154	-0.00844801	-0.821459		0.0213729	-0.058263			59.1605	7.68e-14	0.188889
Resident licence	-5.09982			-0.622024		-0.0579324				59.7345	5.77e-14	0.163671
Resident licence	-4.98951			-0.603246		0.0440734	-0.103602			63.9938	6.85e-15	0.16651
Resident licence	-4.89737									79.6022	2.8e-18	0.120611
Resident licence	-4.89418	0.0970925								84.0215	3.07e-19	0.123382
Resident licence	-4.90694					-0.0465148				85.8253	1.25e-19	0.120961
Resident licence	-4.74913					0.105063	-0.156044			87.3038	5.95e-20	0.127662
Resident licence	-4.86586	0.127099	-0.0281191							90.2679	1.35e-20	0.123699
Resident licence	-4.90209	0.0952612				-0.0380617				90.3354	1.31e-20	0.123609
Resident licence	-4.75064	0.0857085				0.105948	-0.150206			92.221	5.09e-21	0.129748
Resident licence	-4.87319	0.126237	-0.0290614			-0.0399422				96.5654	5.8e-22	0.123948
Resident licence	-4.69357	0.136982	-0.0486443			0.111576	-0.158496			98.0197	2.8e-22	0.130658
Non-resident licence, male	-7.97154	0.196919				0.506255				31.6353	5.74305e-08	0.347817
Non-resident licence, male	-6.92175			0.736363	-0.664561			0.711125	-0.637401	0	0.449783	0.388453
Non-resident licence, male	-6.86048			0.59555	-0.760744	0.414919		0.555664	-0.598527	2.26929	0.144622	0.392381
Non-resident licence, male	-7.6502							0.945259	-0.668511	2.36622	0.13778	0.373947
Non-resident licence, male	-7.52325			0.468998				1.16249	-0.709856	3.20809	0.0904428	0.379324
Non-resident licence, male	-7.62133					0.400165		0.941945	-0.660307	3.95036	0.0624012	0.378619
Non-resident licence, male	-6.99669	0.135372		0.675058	-0.640959			0.718118	-0.586889	5.3404	0.0311422	0.389521
Non-resident licence, male	-7.71144	0.209708						0.973215	-0.596931	5.92921	0.0232001	0.376736
Non-resident licence, male	-7.82453					0.190247	0.175789	1.00472	-0.641064	7.36718	0.0113042	0.381525
Non-resident licence, male	-7.53582			0.352647		0.275895		1.10198	-0.691131	7.70246	0.00955947	0.381208
Non-resident licence, male	-6.9259	0.101958		0.558421	-0.732013	0.39128		0.573054	-0.563546	8.09239	0.00786615	0.392994
Non-resident licence, male	-7.5844	0.156766		0.410767				1.15536	-0.651461	8.15292	0.00763166	0.380782
Non-resident licence, male	-7.67587	0.168762				0.359398		0.961426	-0.603128	8.52917	0.00632292	0.380425
Non-resident licence, male	-7.73473			0.326788		0.0850836	0.166313	1.15141	-0.671475	11.4731	0.00145098	0.383769
Non-resident licence, male	-7.01275	0.0865567	0.0392616	0.678248	-0.654841			0.715632	-0.594706	11.6834	0.00130613	0.389651
Non-resident licence, male	-7.70888	0.214424	-0.00367198					0.972376	-0.595988	12.4113	0.00090765	0.376737
Non-resident licence, male	-7.84285	0.132538				0.183921	0.155566	1.01341	-0.597823	12.6944	0.000787862	0.382617
Non-resident licence, male	-7.59184	0.14132		0.308749		0.257417		1.09888	-0.639496	12.9099	0.000707374	0.382414
Non-resident licence, male	-7.57531	0.172561	-0.0125211	0.41173				1.15314	-0.648496	14.6215	0.00030059	0.380795
Non-resident licence, male	-7.6807	0.16033	0.00629804			0.359672		0.963172	-0.604336	15.0084	0.000247721	0.380429
Non-resident licence, male	-7.19109	0.323881		0.536443	-0.849618					15.2875	0.000215454	0.367753
Non-resident licence, male	-7.3516			0.495161	-0.943811	0.234298	0.264601			15.4849	0.000195212	0.373801
Non-resident licence, male	-7.18681	0.288472		0.436752	-0.850129	0.448634				15.8138	0.000165606	0.373486
Non-resident licence, male	-7.11899			0.554362	-0.856629	0.5085				16.2284	0.0001346	0.366843
Non-resident licence, male	-7.12247	-0.0594905	0.0823808	0.546886	-0.821725	0.212143	0.196127	0.572133	-0.567359	17.0081	9.11e-05	0.396741
Non-resident licence, male	-7.75573	0.10636		0.294602		0.0918109	0.150596	1.14365	-0.635393	17.2533	8.06e-05	0.384431
Non-resident licence, male	-7.13248			0.687027	-0.844126					17.4696	7.24e-05	0.35932
Non-resident licence, male	-7.35655	0.223624		0.408979	-0.918658	0.246917	0.212229			18.0392	5.44e-05	0.377551
Non-resident licence, male	-7.85051	0.117923	0.0108144			0.184516	0.155886	1.01656	-0.601093	19.1654	3.1e-05	0.382629
Non-resident licence, male	-7.58888	0.145365	-0.0029664	0.309062		0.25741		1.0982	-0.639522	19.3921	2.77e-05	0.382415
Non-resident licence, male	-6.95614			0.488523	-1.05771	0.583946		-0.31837		20.5512	1.55e-05	0.368931
Non-resident licence, male	-7.21763			0.447881	-1.08825	0.304767	0.2483	-0.237479		20.8343	1.35e-05	0.374885
Non-resident licence, male	-7.16905	0.369806	-0.0407189	0.531806	-0.837134					21.614	9.11e-06	0.367904
Non-resident licence, male	-7.21444	0.331314		0.539369	-0.822864			0.0427104		21.7206	8.64e-06	0.367801
Non-resident licence, male	-7.11681	0.263389		0.420702	-0.928284	0.481598		-0.124417		22.0047	7.49e-06	0.373765
Non-resident licence, male	-7.17336	0.320477	-0.0277694	0.433526	-0.840399	0.445869				22.2237	6.72e-06	0.373556
Non-resident licence, male	-7.0558			0.668399	-0.938532			-0.148577		23.4491	3.64e-06	0.359813
Non-resident licence, male	-7.75791	0.102403	0.00298513	0.294201		0.092112	0.15071	1.14428	-0.636296	23.7354	3.15e-06	0.384432
Non-resident licence, male	-7.29985	0.205921		0.395881	-0.979826	0.275033	0.209445	-0.0986853		24.3551	2.31e-06	0.37771
Non-resident licence, male	-7.34849	0.242231	-0.0152417	0.407013	-0.912644	0.246121	0.211374			24.4985	2.15e-06	0.377574
Non-resident licence, male	-8.0551	0.414913						0.499721		26.7963	6.83e-07	0.350118
Non-resident licence, male	-7.19652	0.382382	-0.0437166	0.534973	-0.803129			0.0526761		28.0234	3.7e-07	0.367976
Non-resident licence, male	-7.11073	0.288127	-0.0196758	0.418266	-0.917345	0.478988		-0.118849		28.4508	2.99e-07	0.373801
Non-resident licence, male	-8.01968	0.363633				0.360039		0.458812		29.1227	2.13e-07	0.354236
Non-resident licence, male	-7.94564					0.500786				30.5486	1.05e-07	0.339867
Non-resident licence, male	-7.29677	0.217452	-0.00898781	0.395074	-0.974378	0.273711	0.209009	-0.0956423		30.8294	9.09e-08	0.377719
Non-resident licence, male	-7.96246	0.551221	-0.118217					0.489626		31.7868	5.63e-08	0.3516
Non-resident licence, male	-8.00386	0.398054		0.192122				0.564717		32.2187	4.54e-08	0.351171
Non-resident licence, male	-7.92778	0.476893	-0.119709			0.452579		0.462858		32.3418	4.03392e-08	0.359929
Non-resident licence, male	-8.00386									32.5289	3.89e-08	0.331269
Non-resident licence, male	-7.96335					0.473316		0.290328		32.5909	3.77e-08	0.344334
Non-resident licence, male	-7.9674	0.223785				0.453525				32.6707	3.62e-08	0.344254
Non-resident licence, male	-8.01794	0.260944								32.9294	3.18e-08	0.33746
Non-resident licence, male	-8.18157	0.327542				0.193852	0.154353	0.523095		33.4299	2.48e-08	0.35638
Non-resident licence, male	-8.01227							0.312612		33.6588	2.21e-08	0.33672
Non-resident licence, male	-7.92822	0.501725	-0.118532			0.361128		0.448725		34.0807	1.79e-08	0.35574
Non-resident licence, male	-7.99295			-0.133178		0.592807				34.4309	1.41931e-08	0.345023
Non-resident licence, male	-8.19936					0.224488	0.211555	0.401964		34.8644	1.21e-08	0.348541
Non-resident licence, male	-7.99989	0.359555		0.0818642		0.336862		0.488607		35.4212	9.15e-09	0.354418
Non-resident licence, male	-8.06853					0.373288	0.113639			35.7083	7.93e-09	0.341202
Non-resident licence, male	-7.96649			-0.0748622		0.518217				36.8725	4.43e-09	0.340028
Non-resident licence, male	-7.90276	0.539602	-0.124537	0.207152				0.560086		37.0474	4.06e-09	0.352811
Non-resident licence, male	-7.86585	0.373742	-0.129463			0.451979				37.3071	3.56e-09	0.346103
Non-resident licence, male	-7.91158	0.411956	-0.131015							37.5292	3.19e-09	0.339365
Non-resident licence, male	-7.93133			0.302875				0.428454		37.668	2.98e-09	0.339225
Non-resident licence, male	-8.02538	0.255217		-0.193936		0.489909				38.0941	2.4e-09	0.345316
Non-resident licence, male	-8.0909	0.465649	-0.115997			0.194012	0.155032	0.512902		38.3697	2.09e-09	0.357897
Non-resident licence, male	-7.92713			0.150666		0.429535		0.348899		38.504	1.96e-09	0.344906
Non-resident licence, male	-8.0256	0.205018				0.395685	0.0569942			38.8559	1.64e-09	0.344553
Non-resident licence, male	-7.9914			0.0417731						38.9523	1.57e-09	0.33133
Non-resident licence, male	-8.04873	0.278711		-0.0987262						39.1203	1.44e-09	0.337756
Non-resident licence, male	-8.16483	0.324959		0.0591578		0.179362	0.152152	0.543683		39.8128	1.02e-09	0.356479
Non-resident licence, male	-7.90327	0.499252	-0.121114	0.0961251		0.333242		0.484268		40.3154	7.92e-10	0.355984
Non-resident licence, male	-8.16671			0.115006		0.196315	0.206997	0.44441		41.004	5.61e-10	0.348883
Non-resident licence, male	-8.12482			-0.133273		0.383963	0.130699			41.6978	3.97e-10	0.341699
Non-resident licence, male	-7.92384	0.399368	-0.12491	-0.181841		0.487154				42.8519	2.23e-10	0.347041
Non-resident licence, male	-7.92503	0.354637	-0.128926			0.392602	0.0583888			43.476	1.63e-10	0.346417
Non-resident licence, male	-7.93989	0.424673	-0.128339	-0.0836804						43.8007	1.39e-10	0.339579
Non-resident licence, male	-8.11277	0.233604		-0.218804		0.414952	0.0780347			44.0261	1.24e-10	0.345868
Non-resident licence, male	-8.06876	0.464202	-0.11794	0.0732874		0.175845	0.152164	0.538581		44.7047	8.82e-11	0.358043
Non-resident licence, male	-8.01163	0.377449	-0.123675	-0.20703		0.41197	0.0784779			48.7762	1.15e-11	0.347599

## Sheet: 1990s
Table S2. Models to predict the harvest of caribou in Newfoundland, 1990-1994. The regression coefficients are shown for each variable in the model. Variables not in the models appear as blank entries.
Harvest type	Intercept	Proportion of lichen cover	Proportion of lichen cover squared	Distance to cutblocks	Distance to cutblocks squared	Distance to power lines	Distance to power lines squared	Distance to towns	Distance to towns squared	ΔAIC	AIC weight	R²
Total harvest	-4.28337	0.295257		-0.510061		-0.240505		0.400532	-0.171975	0	0.397335	0.302093
Total harvest	-4.43565	0.342591		-0.601607		-0.208532		0.294071		1.40594	0.196726	0.293624
Total harvest	-4.39976	0.345551		-0.71949				0.240693		1.65531	0.173665	0.286315
Total harvest	-4.27338	0.310217		-0.657002				0.320306	-0.138061	2.83991	0.0960458	0.292073
Total harvest	-4.23955	0.345954	-0.0448095	-0.497345		-0.245371		0.401168	-0.171324	5.68723	0.0231308	0.302942
Total harvest	-4.30711	0.297674		-0.504964		-0.281257	0.0318861	0.405075	-0.18328	6.13408	0.0184994	0.302466
Total harvest	-4.28808	0.296803		-0.516263	0.0054287	-0.239806		0.402503	-0.172502	6.47582	0.0155937	0.302101
Total harvest	-4.41017	0.321913		-0.868946						6.68977	0.0140117	0.273635
Total harvest	-4.3911	0.393679	-0.0450755	-0.589594		-0.21357		0.293156		7.09016	0.0114696	0.294486
Total harvest	-4.36322	0.385916	-0.0360017	-0.710608				0.239163		7.6237	0.00878397	0.286876
Total harvest	-4.41941	0.339747		-0.601276		-0.190771	-0.0153641	0.295362		7.80591	0.00801906	0.293714
Total harvest	-4.42255	0.338249		-0.585609	-0.0139192	-0.21072		0.289475		7.84169	0.00787688	0.293675
Total harvest	-4.40388	0.346928		-0.724049	0.00426074			0.242267		8.1338	0.00680651	0.28632
Total harvest	-4.23913	0.34885	-0.0344896	-0.647828				0.319636	-0.137129	8.847	0.0047649	0.292588
Total harvest	-4.29277	0.316431		-0.679711	0.0224284			0.32986	-0.140612	9.199	0.00399594	0.292208
Total harvest	-4.18435	0.210221				-0.355011		0.527348	-0.228639	9.61205	0.00325031	0.284705
Total harvest	-4.43324	0.31619		-0.819874		-0.12037				10.7646	0.00182666	0.276304
Total harvest	-4.26332	0.347361	-0.0440893	-0.492769		-0.284654	0.0306731	0.405515	-0.18206	11.8476	0.00106286	0.303286
Total harvest	-4.34786	0.304365		-0.785729	-0.0637778					12.0717	0.000950201	0.274857
Total harvest	-4.25075	0.352498	-0.0468723	-0.513954	0.0153206	-0.243513		0.406789	-0.172781	12.1149	0.000929916	0.303001
Total harvest	-4.36838	0.367472	-0.0408652	-0.855492						12.498	0.000767795	0.274384
Total harvest	-4.31487	0.300131		-0.514451	0.00848711	-0.280801	0.032452	0.408267	-0.184282	12.5999	0.000729674	0.302484
Total harvest	-4.37388	0.390988	-0.0452693	-0.589124		-0.194929	-0.016061	0.294532		13.4825	0.000469329	0.294584
Total harvest	-4.38777	0.391782	-0.0445012	-0.585012	-0.00413259	-0.214155		0.291813		13.5692	0.000449401	0.29449
Total harvest	-4.19256			-0.317307		-0.268585		0.41258	-0.249458	13.6604	0.000429373	0.280263
Total harvest	-4.37364	0.391878	-0.0378208	-0.723323	0.0127538			0.243932		14.0681	0.00035019	0.286918
Total harvest	-4.14224					-0.340286		0.498697	-0.270949	14.1372	0.000338297	0.272563
Total harvest	-4.12175	0.289315	-0.0680319			-0.35606		0.522482	-0.225766	14.2087	0.000326422	0.286765
Total harvest	-4.40499	0.335073		-0.584308	-0.0147597	-0.192531	-0.0158565	0.290555		14.2359	0.000322009	0.293771
Total harvest	-4.26159	0.361846	-0.0386495	-0.677635	0.0307457			0.332663	-0.140464	15.105	0.000208519	0.292832
Total harvest	-4.21935	0.214127				-0.412601	0.0456707	0.532625	-0.244276	15.3654	0.000183061	0.285502
Total harvest	-4.35533	0.292503		-0.702084	-0.0832754	-0.139993				15.4414	0.000176241	0.278301
Total harvest	-4.38613	0.369068	-0.0473393	-0.802603		-0.126438				16.3477	0.000112019	0.2773
Total harvest	-4.43444	0.316417		-0.819775		-0.121741	0.00112779			17.2472	7.14469e-05	0.276305
Total harvest	-4.37966	0.256348				-0.346994		0.40845		17.7181	5.64572e-05	0.268569
Total harvest	-4.32154	0.342738	-0.0324172	-0.784486	-0.0568151					18.1389	4.57459e-05	0.275318
Total harvest	-4.27742	0.355133	-0.0464746	-0.512265	0.0180427	-0.283853	0.0317662	0.412293	-0.184115	18.2541	4.31848e-05	0.303368
Total harvest	-4.14188			-0.258604	-0.0649101	-0.275195		0.388157	-0.237925	19.1053	2.82157e-05	0.281405
Total harvest	-4.18082			-0.46393				0.321719	-0.211973	19.3184	2.53645e-05	0.266777
Total harvest	-4.36977	0.388723	-0.0445962	-0.583646	-0.00493044	-0.195503	-0.0161823	0.292944		19.9599	1.84047e-05	0.29459
Total harvest	-4.20493			-0.31297		-0.292284	0.0179284	0.415564	-0.256662	20.0319	1.77532e-05	0.280386
Total harvest	-4.15639	0.291059	-0.0665346			-0.410453	0.0428625	0.527589	-0.240224	20.0508	1.75865e-05	0.287464
Total harvest	-4.16585					-0.381509	0.032363	0.50222	-0.283292	20.2528	1.58973e-05	0.272971
Total harvest	-4.3262	0.336087	-0.0366236	-0.700379	-0.0754758	-0.142627				21.395	8.98011e-06	0.278884
Total harvest	-4.3528	0.292012		-0.702128	-0.0833937	-0.137238	-0.00227854			21.9227	6.89763e-06	0.278302
Total harvest	-4.31105	0.338925	-0.0717296			-0.347886		0.400989		22.12	6.24959e-06	0.270893
Total harvest	-4.38681	0.369197	-0.0473418	-0.802547		-0.127221	0.000641206			22.8307	4.38066e-06	0.2773
Total harvest	-4.36125	0.253417				-0.326636	-0.017438	0.409779		24.0929	2.33047e-06	0.26869
Total harvest	-4.40494			-0.391146		-0.220632		0.250699		24.759	1.67035e-06	0.260652
Total harvest	-4.13964			-0.422112	-0.0523858			0.299207	-0.202412	25.1301	1.38746e-06	0.267529
Total harvest	-4.15323			-0.255473	-0.0640963	-0.295591	0.0155178	0.390987	-0.244272	25.5044	1.15069e-06	0.281497
Total harvest	-4.11681	0.196594						0.447223	-0.203224	25.6392	1.07565e-06	0.259656
Total harvest	-4.36788			-0.509699				0.194692		25.9235	9.33119e-07	0.251955
Total harvest	-4.37854			-0.637669						26.7907	6.04812e-07	0.243501
Total harvest	-4.32369	0.335611	-0.0365939	-0.700699	-0.0756631	-0.13987	-0.00228106			27.8764	3.51463e-07	0.278886
Total harvest	-4.29998			-0.29085	-0.114137	-0.23686		0.216877		28.0219	3.26793e-07	0.264283
Total harvest	-4.2477			-0.498973	-0.136833					28.2158	2.96607e-07	0.249329
Total harvest	-4.29044	0.336245	-0.0720983			-0.325366	-0.0191196	0.40244		28.4732	2.60783e-07	0.271038
Total harvest	-4.36833					-0.31317		0.341313		28.5934	2.45573e-07	0.248895
Total harvest	-4.08679							0.421175	-0.237036	29.023	1.98107e-07	0.248402
Total harvest	-4.26038			-0.406441	-0.158826	-0.181411				29.402	1.63905e-07	0.255384
Total harvest	-4.40656			-0.583175		-0.148574				29.5512	1.52121e-07	0.247794
Total harvest	-4.34202			-0.400288		-0.149607	-0.0611905	0.257145		29.8884	1.28524e-07	0.262181
Total harvest	-4.27735			-0.435816	-0.0964923			0.161214		30.0955	1.15881e-07	0.254594
Total harvest	-4.05415	0.273649	-0.0682737					0.440911	-0.200079	30.1838	1.10876e-07	0.261847
Total harvest	-4.29259	0.230791						0.341036		31.0302	7.2615e-08	0.246091
Total harvest	-4.24245			-0.301388	-0.111887	-0.169024	-0.0579382	0.224393		33.2814	2.35608e-08	0.265658
Total harvest	-4.3156					-0.25605	-0.0505947	0.34818		34.1499	1.52614e-08	0.249959
Total harvest	-4.21837			-0.419043	-0.158032	-0.130029	-0.0414775			35.2401	8.84826e-09	0.256118
Total harvest	-4.36107			-0.595775		-0.0943315	-0.0440939			35.3104	8.54267e-09	0.248627
Total harvest	-4.22361	0.311696	-0.0719981					0.332438		35.3719	8.2841e-09	0.248556
Total harvest	-4.29058							0.288015		38.8225	1.47553e-09	0.229454
Total harvest	-4.34319	0.16967				-0.253931				46.5058	3.16635e-11	0.228039
Total harvest	-4.3407					-0.246167				47.5468	1.88146e-11	0.219106
Total harvest	-4.25119	0.281197	-0.0972391			-0.255824				48.9535	9.31184e-12	0.232788
Total harvest	-4.27983	0.165294								50.3995	4.51905e-12	0.215693
Total harvest	-4.28001									51.1201	3.1518e-12	0.207006
Total harvest	-4.35413	0.171723				-0.266368	0.0102485			52.9495	1.26273e-12	0.228085
Total harvest	-4.18901	0.272978	-0.0955041							52.9614	1.25525e-12	0.220381
Total harvest	-4.32532					-0.228846	-0.0145249			53.9501	7.65672e-13	0.219202
Total harvest	-4.25902	0.282368	-0.0970547			-0.264598	0.00713231			55.4176	3.67603e-13	0.23281
Resident licence, male	-4.86677	0.317065		-0.878028						0	0.530194	0.199748
Resident licence, male	-4.86118	0.331379		-0.778574				0.164556		1.93381	0.201611	0.205295
Resident licence, male	-4.89858	0.317434		-0.667908		-0.197817		0.211944		3.49484	0.092372	0.211253
Resident licence, male	-4.89366	0.303607		-0.82023		-0.135313				4.02271	0.0709436	0.202752
Resident licence, male	-4.84723	0.339432	-0.01876	-0.87207						6.36576	0.0219851	0.199891
Resident licence, male	-4.86496	0.316588		-0.875618	-0.00180429					6.48223	0.0207413	0.199749
Resident licence, male	-4.91355	0.34731		-0.835246	0.052998			0.185715		7.84523	0.0104922	0.205989
Resident licence, male	-4.81319	0.320221		-0.75416				0.19137	-0.0493258	7.95933	0.00991035	0.205851
Resident licence, male	-4.84931	0.345064	-0.0114804	-0.776014				0.163615		8.37338	0.00805709	0.205348
Resident licence, male	-4.82967	0.299352		-0.628435		-0.206665		0.253424	-0.0724737	9.01734	0.00583908	0.212411
Resident licence, male	-4.93299	0.328391		-0.71	0.0357025	-0.192004		0.224456		9.7251	0.00409878	0.211558
Resident licence, male	-4.88195	0.337267	-0.0163914	-0.664155		-0.198975		0.210876		9.88968	0.00377501	0.21136
Resident licence, male	-4.91253	0.319729		-0.668657		-0.212881	0.0129382	0.210954		9.93	0.00369967	0.211311
Resident licence, male	-4.86945	0.332045	-0.0237205	-0.812337		-0.137375				10.3192	0.00304543	0.20298
Resident licence, male	-4.91895	0.308127		-0.819627		-0.163614	0.0234083			10.3467	0.00300381	0.202946
Resident licence, male	-4.87258	0.297233		-0.788387	-0.0221115	-0.140813				10.398	0.00292773	0.202884
Resident licence, male	-4.84922	0.340495	-0.0191124	-0.875108	0.00236308					12.8476	0.000860232	0.199893
Resident licence, male	-4.83862			-0.670125						13.69	0.000564532	0.174678
Resident licence, male	-4.8651	0.336157		-0.812645	0.0558601			0.215225	-0.0527923	13.8063	0.000532646	0.206623
Resident licence, male	-4.89776	0.371316	-0.0192187	-0.835315	0.0571205			0.185753		14.212	0.000434856	0.20613
Resident licence, male	-4.79742	0.336705	-0.0141113	-0.750291				0.191004	-0.0505302	14.377	0.000400411	0.20593
Resident licence, male	-4.85388	0.302006		-0.623252		-0.248667	0.0340578	0.258454	-0.0856292	15.1984	0.000265549	0.212775
Resident licence, male	-4.86544	0.310761		-0.673629	0.0388858	-0.200628		0.267801	-0.0743723	15.1988	0.000265493	0.212774
Resident licence, male	-4.80723	0.323437	-0.0203585	-0.622596		-0.208276		0.253409	-0.0743125	15.3649	0.000244337	0.212574
Resident licence, male	-4.8753			-0.605784		-0.182997				15.5637	0.00022122	0.180475
Resident licence, male	-4.91539	0.356123	-0.0218313	-0.710486	0.0404358	-0.192805		0.224664		16.0577	0.000172799	0.21174
Resident licence, male	-4.9495	0.331283		-0.711706	0.0365576	-0.208754	0.0145905	0.223645		16.1485	0.00016513	0.21163
Resident licence, male	-4.89576	0.3392	-0.016134	-0.664888		-0.213627	0.0125713	0.209905		16.3281	0.000150953	0.211414
Resident licence, male	-4.89466	0.335812	-0.0232096	-0.811824		-0.165117	0.0228092			16.651	0.000128446	0.203164
Resident licence, male	-4.89815	0.301924		-0.789763	-0.0206339	-0.167615	0.0223506			16.7362	0.000123087	0.20306
Resident licence, male	-4.85545	0.323985	-0.0211412	-0.788037	-0.0174667	-0.141577				16.7372	0.000123027	0.203059
Resident licence, male	-4.87768			-0.472728		-0.235135		0.181329		16.9852	0.000108678	0.186793
Resident licence, male	-4.83332			-0.591065				0.124683		17.6002	7.99e-05	0.177919
Resident licence, male	-4.73593			-0.422816		-0.250987		0.272543	-0.153575	18.8451	4.29e-05	0.192522
Resident licence, male	-4.77116			-0.597994	-0.0688604					19.1136	3.75e-05	0.176014
Resident licence, male	-4.83996	0.215864				-0.360434		0.336562		19.7317	2.75e-05	0.183371
Resident licence, male	-4.84459	0.363664	-0.0224919	-0.811585	0.0607341			0.216632	-0.0549174	20.1307	2.25e-05	0.206815
Resident licence, male	-4.78818			-0.500599	-0.0924852	-0.201697				20.1929	2.19e-05	0.182795
Resident licence, male	-4.71239			-0.553835				0.19703	-0.128375	20.8042	1.61e-05	0.182031
Resident licence, male	-4.89407	0.314589		-0.671373	0.041627	-0.245217	0.0366135	0.27418	-0.0885247	21.3374	1.23e-05	0.213189
Resident licence, male	-4.84167	0.343552	-0.0264283	-0.672657	0.0446168	-0.201858		0.269809	-0.0769537	21.4623	1.16e-05	0.213039
Resident licence, male	-4.83158	0.32582	-0.020185	-0.617498		-0.250214	0.0339295	0.258436	-0.0873917	21.548	1.11e-05	0.212935
Resident licence, male	-4.70017	0.189236				-0.354278		0.408595	-0.151358	21.7679	9.94e-06	0.188905
Resident licence, male	-4.85584			-0.609741		-0.159983	-0.0184086			21.9507	9.08e-06	0.180595
Resident licence, male	-4.66462					-0.347671		0.384806	-0.187769	22.3056	7.6e-06	0.180151
Resident licence, male	-4.93157	0.358634	-0.0216193	-0.712143	0.0411992	-0.209084	0.0141482	0.223861		22.4849	6.95e-06	0.211807
Resident licence, male	-4.83511					-0.347271		0.285969		22.8532	5.78e-06	0.171289
Resident licence, male	-4.82673			-0.424877	-0.0538282	-0.241768		0.163726		22.8909	5.67e-06	0.187511
Resident licence, male	-4.88092	0.328239	-0.0208627	-0.789398	-0.0160956	-0.168093	0.0220632			23.079	5.16e-06	0.203231
Resident licence, male	-4.84723			-0.475816		-0.200738	-0.0289171	0.183971		23.2343	4.78e-06	0.187084
Resident licence, male	-4.79638			-0.560683	-0.0383143			0.110314		23.7903	3.62e-06	0.178287
Resident licence, male	-4.70685			-0.391704	-0.034827	-0.254745		0.259142	-0.14914	25.0847	1.89e-06	0.192822
Resident licence, male	-4.74781			-0.41864		-0.274068	0.0181	0.275691	-0.161383	25.2408	1.75e-06	0.192629
Resident licence, male	-4.79606	0.270959	-0.044346			-0.359028		0.330264		25.5574	1.5e-06	0.184191
Resident licence, male	-4.8492	0.217266				-0.370671	0.00860942	0.335991		26.1937	1.09e-06	0.183397
Resident licence, male	-4.76984			-0.504409	-0.092281	-0.179793	-0.0175555			26.5883	8.93e-07	0.182904
Resident licence, male	-4.69408			-0.536577	-0.0216841			0.187593	-0.125527	27.1933	6.6e-07	0.182148
Resident licence, male	-4.64768	0.251016	-0.0502867			-0.352571		0.4041	-0.154219	27.4064	5.93e-07	0.189952
Resident licence, male	-4.73751	0.193829				-0.416678	0.0510504	0.414948	-0.170369	27.5613	5.49e-07	0.18976
Resident licence, male	-4.87022	0.347503	-0.0265966	-0.670379	0.047315	-0.24671	0.0366941	0.276204	-0.0911098	27.5993	5.39e-07	0.213455
Resident licence, male	-4.69079					-0.39388	0.0375349	0.389297	-0.203035	28.4133	3.59e-07	0.180621
Resident licence, male	-4.79849			-0.428547	-0.0529334	-0.208758	-0.0276102	0.166622		29.1593	2.47e-07	0.187778
Resident licence, male	-4.81508					-0.325208	-0.0188194	0.288008		29.2371	2.38e-07	0.171415
Resident licence, male	-4.74359	0.205461						0.270049		30.3218	1.38e-07	0.161771
Resident licence, male	-4.80575					-0.286615				31.3125	8.41e-08	0.152137
Resident licence, male	-4.71878			-0.387944	-0.0343209	-0.27698	0.0174849	0.262346	-0.156701	31.4866	7.71e-08	0.192922
Resident licence, male	-4.80383	0.271871	-0.0441716			-0.367483	0.00707248	0.329807		32.0263	5.89e-08	0.184209
Resident licence, male	-4.74319							0.225576		32.5736	4.48e-08	0.150501
Resident licence, male	-4.61292	0.185542						0.339382	-0.142665	32.7506	4.1e-08	0.166952
Resident licence, male	-4.58703							0.314839	-0.171484	33.1388	3.38e-08	0.158153
Resident licence, male	-4.68528	0.254441	-0.0495577			-0.414206	0.0500791	0.410437	-0.172759	33.2262	3.23e-08	0.190773
Resident licence, male	-4.80477	0.149006				-0.284734				33.2951	3.12e-08	0.157952
Resident licence, male	-4.73197									35.7495	9.15e-09	0.137861
Resident licence, male	-4.69282	0.267677	-0.0518381					0.261823		35.8967	8.5e-09	0.162935
Resident licence, male	-4.73074	0.154605								37.3404	4.13e-09	0.144286
Resident licence, male	-4.81222					-0.293948	0.00599513			37.7845	3.31e-09	0.152152
Resident licence, male	-4.73273	0.241644	-0.0739533			-0.283001				37.8622	3.18e-09	0.160415
Resident licence, male	-4.55366	0.253699	-0.0574967					0.333347	-0.145831	38.12	2.8e-09	0.168369
Resident licence, male	-4.83389	0.154087				-0.3177	0.0269147			39.5667	1.36e-09	0.158224
Resident licence, male	-4.65628	0.248233	-0.076895							41.7439	4.57e-10	0.147003
Resident licence, male	-4.75949	0.245152	-0.0732185			-0.312665	0.0239815			44.1777	1.35e-10	0.16063
Resident licence, female	-6.41728	0.335969				-0.44357		0.399686		0	0.221884	0.16523
Resident licence, female	-6.43976	0.436066		-0.434589		-0.356854		0.326661		0.30717	0.190294	0.173076
Resident licence, female	-6.22749	0.312154				-0.454639		0.52471	-0.217974	0.426332	0.179287	0.172925
Resident licence, female	-6.3777	0.426749		-0.70241						2.13718	0.0762154	0.154154
Resident licence, female	-6.37003	0.438108		-0.573717				0.248796		2.69877	0.0575568	0.161778
Resident licence, female	-6.28451	0.39774		-0.346		-0.384276		0.441117	-0.171959	3.25361	0.0436127	0.177536
Resident licence, female	-6.42949	0.418119		-0.616624		-0.266711				3.44338	0.0396649	0.160823
Resident licence, female	-6.31004	0.317529				-0.342786	-0.108649	0.417157		4.84167	0.0197139	0.167323
Resident licence, female	-6.32679	0.41709		-0.439358		-0.249768	-0.115219	0.345478		4.9687	0.0185007	0.175376
Resident licence, female	-6.16911					-0.415752		0.473972	-0.257231	5.50999	0.0141139	0.158167
Resident licence, female	-6.36414	0.405846	-0.055736			-0.443078		0.385961		5.85502	0.0118775	0.166031
Resident licence, female	-6.52236	0.458445		-0.528667	0.0847761	-0.349071		0.356342		5.9896	0.0111045	0.174088
Resident licence, female	-6.1669	0.301654				-0.383424	-0.0739652	0.527819	-0.204501	6.17299	0.0101316	0.173856
Resident licence, female	-6.1754	0.381642	-0.0555612			-0.454558		0.512893	-0.21717	6.28536	0.00957806	0.173714
Resident licence, female	-6.40633	0.477076	-0.0344943	-0.42459		-0.35985		0.320539		6.55624	0.00836481	0.173372
Resident licence, female	-6.24704	0.411236		-0.509143				0.334132	-0.130344	7.05314	0.00652462	0.164502
Resident licence, female	-6.38944					-0.3895		0.31991		7.45269	0.00534313	0.147251
Resident licence, female	-6.30108	0.301056						0.321655		7.71894	0.00467714	0.146904
Resident licence, female	-6.47004	0.4636		-0.680895	0.101607			0.288402		8.02404	0.00401538	0.163261
Resident licence, female	-6.33203	0.47952	-0.0447836	-0.680916						8.20521	0.00366764	0.154691
Resident licence, female	-6.37822	0.423237		-0.460491	0.105238	-0.37597		0.484039	-0.182944	8.52037	0.00313293	0.179064
Resident licence, female	-6.39496	0.430679		-0.724287	0.0173913					8.58406	0.00303475	0.154201
Resident licence, female	-6.21522	0.387973		-0.358647		-0.298414	-0.0874179	0.442724	-0.154202	8.72321	0.00283078	0.178809
Resident licence, female	-6.35219	0.403207		-0.62872		-0.188163	-0.078081			9.07106	0.00237886	0.16192
Resident licence, female	-6.34711	0.465187	-0.0229888	-0.566348				0.244487		9.07653	0.00237237	0.161913
Resident licence, female	-6.37009	0.489855	-0.0605632	-0.587765		-0.27629				9.1744	0.00225908	0.161788
Resident licence, female	-6.13181	0.283589						0.434408	-0.193084	9.20619	0.00222345	0.153396
Resident licence, female	-6.24687	0.442223	-0.0380035	-0.333525		-0.387768		0.436244	-0.172918	9.45219	0.00196611	0.177893
Resident licence, female	-6.3734	0.268614				-0.353395				9.63155	0.00179747	0.144406
Resident licence, female	-6.42198	0.416443		-0.606642	-0.0077931	-0.26788				9.91879	0.001557	0.160833
Resident licence, female	-6.08277					-0.308457	-0.111151	0.47953	-0.233207	10.2906	0.00129284	0.160356
Resident licence, female	-6.2373					-0.246974	-0.156428	0.350537		10.4015	0.00122313	0.151847
Resident licence, female	-6.40724	0.438516		-0.529183	0.0805807	-0.244099	-0.113338	0.373188		10.7217	0.00104217	0.176296
Resident licence, female	-6.26139	0.384594	-0.0527817			-0.343453	-0.106708	0.40402		10.7585	0.00102315	0.168043
Resident licence, female	-6.29853	0.45394	-0.030424	-0.43028		-0.253336	-0.113743	0.340013		11.2688	0.000792745	0.175607
Resident licence, female	-6.36373					-0.335654				11.8727	0.000586138	0.132916
Resident licence, female	-6.35328	0.438491		-0.633502	0.120263			0.389144	-0.144352	11.9389	0.000567055	0.16654
Resident licence, female	-6.17304			-0.0320862		-0.408193		0.464591	-0.254091	11.9572	0.000561884	0.158213
Resident licence, female	-6.48718	0.521485	-0.050094	-0.529696	0.0982681	-0.351852		0.351864		12.0096	0.000547368	0.174672
Resident licence, female	-6.11806	0.369351	-0.0535823			-0.384797	-0.0719751	0.516386	-0.204128	12.0733	0.000530203	0.174592
Resident licence, female	-6.28313	0.258784								12.336	0.000464933	0.132301
Resident licence, female	-6.09331							0.399747	-0.223195	12.4749	0.000433756	0.140678
Resident licence, female	-6.28874							0.267617		12.5942	0.000408622	0.131959
Resident licence, female	-6.22202	0.440099	-0.0247016	-0.500284				0.330423	-0.130706	13.4129	0.000271366	0.16466
Resident licence, female	-6.39413			-0.112748		-0.36289		0.293454		13.455	0.00026571	0.147878
Resident licence, female	-6.2471	0.372717	-0.0572416					0.307119		13.5153	0.000257825	0.1478
Resident licence, female	-6.27699	0.402319	-0.10406			-0.358833				13.7148	0.000233346	0.14754
Resident licence, female	-6.27839									13.9615	0.000206263	0.121476
Resident licence, female	-6.30774	0.412458		-0.467401	0.100489	-0.294488	-0.0832541	0.483717	-0.165836	14.0912	0.000193313	0.180208
Resident licence, female	-6.44053	0.515117	-0.041369	-0.680149	0.113289			0.284953		14.1865	0.000184315	0.163671
Resident licence, female	-6.33664	0.492282	-0.0560433	-0.458667	0.119719	-0.379649		0.482004	-0.185238	14.4217	0.000163864	0.179794
Resident licence, female	-6.32856			-0.37765						14.5202	0.000155993	0.129398
Resident licence, female	-6.35916	0.495246	-0.0516444	-0.72076	0.0343301					14.5542	0.000153362	0.154864
Resident licence, female	-6.38777			-0.292884		-0.286937				14.8512	0.000132202	0.13755
Resident licence, female	-6.2973	0.472937	-0.0582123	-0.599684		-0.199737	-0.075605			14.8568	0.000131832	0.162813
Resident licence, female	-6.18211	0.429107	-0.0346788	-0.346801		-0.303065	-0.0855601	0.438292	-0.155514	14.9684	0.000124676	0.179108
Resident licence, female	-6.08026	0.353474	-0.0560116					0.421759	-0.191676	15.03	0.000120895	0.154249
Resident licence, female	-6.3391	0.400148		-0.611966	-0.0129078	-0.189643	-0.0787804			15.5329	9.4e-05	0.161947
Resident licence, female	-6.3135	0.255783				-0.295044	-0.059194			15.6105	9.04e-05	0.145065
Resident licence, female	-6.37966	0.495583	-0.0629489	-0.602818	0.012397	-0.274585				15.6407	8.91e-05	0.161809
Resident licence, female	-6.23568			-0.146462		-0.205326	-0.164701	0.318399		16.0759	7.17e-05	0.152895
Resident licence, female	-6.31932			-0.257832				0.219597		16.3263	6.32e-05	0.135602
Resident licence, female	-6.08699			-0.0632952		-0.289105	-0.115898	0.461482	-0.225859	16.6312	5.43e-05	0.160539
Resident licence, female	-6.25832					-0.232599	-0.105396			16.68	5.3e-05	0.135135
Resident licence, female	-6.19234	0.382368	-0.0972432							16.6946	5.26e-05	0.135115
Resident licence, female	-6.37755	0.496833	-0.0456702	-0.530021	0.0932191	-0.248315	-0.110997	0.369038		16.8186	4.94e-05	0.176782
Resident licence, female	-6.1314			-0.200002				0.352526	-0.205932	17.3328	3.82e-05	0.142811
Resident licence, female	-6.31919	0.494057	-0.0454398	-0.630896	0.132652			0.387416	-0.14589	18.0323	2.69e-05	0.167037
Resident licence, female	-6.19271			-0.0527628	0.0237377	-0.406308		0.474211	-0.257814	18.3741	2.27e-05	0.158299
Resident licence, female	-6.25937			-0.335215		-0.150869	-0.132782			18.7596	1.87e-05	0.140938
Resident licence, female	-6.21877	0.38943	-0.103286			-0.301002	-0.0579615			19.7175	1.16e-05	0.148166
Resident licence, female	-6.3771			-0.0972722	-0.0179026	-0.364887		0.287729		19.8995	1.06e-05	0.147928
Resident licence, female	-6.27118	0.478021	-0.052507	-0.46552	0.114514	-0.300321	-0.0802305	0.482019	-0.168762	20.0624	9.76e-06	0.18085
Resident licence, female	-6.30776			-0.201083	-0.0848558	-0.301771				20.4032	8.23e-06	0.138777
Resident licence, female	-6.27279			-0.318707	-0.0571059					20.5746	7.56e-06	0.129969
Resident licence, female	-6.30278	0.476099	-0.0595027	-0.607686	0.00660776	-0.199213	-0.075207			21.3352	5.17e-06	0.162819
Resident licence, female	-6.22365			-0.135052	-0.0130446	-0.207142	-0.164314	0.314249		22.5385	2.83e-06	0.152922
Resident licence, female	-6.32247			-0.260644	0.00326499			0.220779		22.8081	2.47e-06	0.135604
Resident licence, female	-6.10569			-0.082922	0.022423	-0.287474	-0.115709	0.470533	-0.229449	23.0548	2.19e-06	0.160615
Resident licence, female	-6.16454			-0.233772	0.040054			0.370739	-0.212392	23.6286	1.64e-06	0.143056
Resident licence, female	-6.17902			-0.242332	-0.085204	-0.165704	-0.132823			24.3062	1.17e-06	0.142168
Resident Licence	-4.69873	0.338326		-0.609461		-0.243147		0.247246		0	0.299572	0.215639
Resident Licence	-4.65696	0.340912		-0.854995						0.146654	0.278391	0.199754
Resident Licence	-4.65055	0.354579		-0.737798				0.190449		0.696765	0.211446	0.206981
Resident Licence	-4.69267	0.324805		-0.786511		-0.171416				2.84553	0.0722108	0.204371
Resident Licence	-4.60759	0.314678		-0.558684		-0.255192		0.301961	-0.0963705	4.79673	0.027221	0.217659
Resident Licence	-4.72517	0.346166		-0.640966	0.0276527	-0.238616		0.256686		6.33465	0.0126168	0.215817
Resident Licence	-4.58647	0.340153		-0.70568				0.226125	-0.0660281	6.363	0.0124392	0.207971
Resident Licence	-4.68235	0.357565	-0.016073	-0.60581		-0.244268		0.245824		6.40045	0.0122085	0.215739
Resident Licence	-4.69503	0.337766		-0.609432		-0.239094	-0.00345267	0.247592		6.48008	0.0117319	0.215643
Resident Licence	-4.63493	0.365614	-0.0209554	-0.847582						6.48611	0.0116966	0.19993
Resident Licence	-4.64348	0.337507		-0.837298	-0.0135855					6.58813	0.0111149	0.199805
Resident Licence	-4.69709	0.367664		-0.786766	0.047421			0.209092		6.73142	0.0103465	0.207525
Resident Licence	-4.63976	0.366804	-0.0103755	-0.735386				0.189353		7.14519	0.00841283	0.207023
Resident Licence	-4.65706	0.314668		-0.733548	-0.037662	-0.180574				9.02518	0.0032863	0.20474
Resident Licence	-4.66452	0.357334	-0.0274318	-0.776413		-0.174091				9.08465	0.00319002	0.204668
Resident Licence	-4.7053	0.327188		-0.785507		-0.185717	0.0118415			9.28824	0.00288128	0.20442
Resident Licence	-4.63769	0.323563		-0.596237	0.0334801	-0.250067		0.314219	-0.0985367	11.0608	0.00118764	0.217921
Resident Licence	-4.58379	0.339934	-0.0215005	-0.552646		-0.256788		0.301614	-0.0982923	11.1327	0.00114569	0.217835
Resident Licence	-4.6239	0.316701		-0.554582		-0.283999	0.0234161	0.305059	-0.105505	11.14	0.0011415	0.217827
Resident Licence	-4.63403	0.35358		-0.758446	0.052395			0.248506	-0.0701344	12.2979	0.000639801	0.208634
Resident Licence	-4.64895	0.235546				-0.391314		0.361363		12.3443	0.00062513	0.192731
Resident Licence	-4.70858	0.371769	-0.0204188	-0.641298	0.0320741	-0.239343		0.256363		12.6896	0.00052601	0.215971
Resident Licence	-4.57073	0.356331	-0.0140228	-0.70168				0.225482	-0.0672026	12.7831	0.000501972	0.208047
Resident Licence	-4.72221	0.345637		-0.640755	0.0275336	-0.235573	-0.00267373	0.256892		12.8159	0.000493812	0.21582
Resident Licence	-4.67842	0.357056	-0.0161305	-0.605764		-0.240027	-0.00360949	0.246186		12.8802	0.000478182	0.215742
Resident Licence	-4.62732	0.361777	-0.0195978	-0.836289	-0.009117					12.9512	0.00046152	0.199952
Resident Licence	-4.68271	0.388999	-0.0173291	-0.786538	0.0511447			0.20869		13.1221	0.000423715	0.207637
Resident Licence	-4.49677	0.208485				-0.386406		0.440088	-0.165368	13.5578	0.000340767	0.199209
Resident Licence	-4.67749			-0.389964		-0.281528		0.219063		15.0835	0.000158913	0.189343
Resident Licence	-4.63887	0.342794	-0.0224457	-0.732681	-0.0325537	-0.181496				15.3497	0.000139108	0.204933
Resident Licence	-4.46076					-0.37848		0.413407	-0.203069	15.3814	0.000136923	0.188973
Resident Licence	-4.66864	0.316853		-0.733362	-0.0371369	-0.193009	0.0103886			15.4771	0.000130522	0.204778
Resident Licence	-4.51462			-0.337823		-0.30101		0.323364	-0.177421	15.4943	0.000129405	0.196835
Resident Licence	-4.67703	0.359548	-0.0273447	-0.775483		-0.188179	0.011631			15.5287	0.000127197	0.204715
Resident Licence	-4.62832			-0.621245						15.6614	0.000119032	0.172379
Resident Licence	-4.67426			-0.548469		-0.220366				15.7919	0.000111513	0.180379
Resident Licence	-4.64437					-0.374637		0.306561		16.9841	6.14e-05	0.178884
Resident Licence	-4.6133	0.356374	-0.0268514	-0.595041	0.0392812	-0.251284		0.315745	-0.101231	17.323	5.19e-05	0.218185
Resident Licence	-4.65657	0.326109		-0.593595	0.0349814	-0.280747	0.025093	0.318051	-0.108398	17.3844	5.03e-05	0.218112
Resident Licence	-4.60005	0.342184	-0.0218075	-0.548344		-0.286134	0.0237144	0.304691	-0.107541	17.4723	4.81e-05	0.218007
Resident Licence	-4.6079	0.286341	-0.041225			-0.390005		0.354572		18.2719	3.23e-05	0.193416
Resident Licence	-4.62203			-0.52415				0.154076		18.3393	3.12e-05	0.177181
Resident Licence	-4.61375	0.379934	-0.0219307	-0.756821	0.0571976			0.249525	-0.0723251	18.6334	2.69e-05	0.208813
Resident Licence	-4.64461	0.234864				-0.386493	-0.00404664	0.36172		18.8232	2.45e-05	0.192736
Resident Licence	-4.70548	0.371245	-0.0204414	-0.641082	0.0319584	-0.236159	-0.00279234	0.256582		19.1707	2.06e-05	0.215974
Resident Licence	-4.44645	0.267009	-0.0479879			-0.384828		0.434933	-0.168035	19.2888	1.94e-05	0.20013
Resident Licence	-4.52721	0.212897				-0.437459	0.0420169	0.444438	-0.181008	19.5848	1.67e-05	0.199768
Resident Licence	-4.57448			-0.431967	-0.106574	-0.241557				19.9513	1.39e-05	0.183286
Resident Licence	-4.48631			-0.485924				0.23427	-0.144332	20.7359	9.41e-06	0.182306
Resident Licence	-4.55122			-0.541514	-0.0791199					20.824	9.01e-06	0.174049
Resident Licence	-4.62272			-0.340661	-0.0581528	-0.288926		0.20032		20.9326	8.53e-06	0.190128
Resident Licence	-4.62803			-0.397038		-0.225452	-0.0474611	0.224056		20.9481	8.47e-06	0.190109
Resident Licence	-4.47808					-0.409346	0.0251846	0.415908	-0.21341	21.6992	5.82e-06	0.189178
Resident Licence	-4.48631			-0.308176	-0.0341446	-0.304765		0.310516	-0.172917	21.7552	5.65e-06	0.197108
Resident Licence	-4.65051	0.345	-0.0224623	-0.732493	-0.0320352	-0.194052	0.0104583			21.8013	5.53e-06	0.204971
Resident Licence	-4.51888			-0.336225		-0.309488	0.0066006	0.324406	-0.180342	21.9657	5.09e-06	0.196849
Resident Licence	-4.64044			-0.557352		-0.180136	-0.0324377			21.9798	5.05e-06	0.180749
Resident Licence	-4.60701					-0.333845	-0.0353767	0.311337		23.1237	2.85e-06	0.179315
Resident Licence	-4.63218	0.35946	-0.0273189	-0.592302	0.0408299	-0.282767	0.0256408	0.319642	-0.111293	23.6395	2.2e-06	0.218385
Resident Licence	-4.58432			-0.494611	-0.0392774			0.139356		24.5327	1.41e-06	0.177545
Resident Licence	-4.60263	0.285655	-0.0413109			-0.384222	-0.00482914	0.35499		24.749	1.27e-06	0.193424
Resident Licence	-4.54323	0.222496						0.290143		25.1285	1.05e-06	0.168594
Resident Licence	-4.47695	0.271227	-0.0480046			-0.436035	0.0418829	0.439325	-0.183561	25.3183	9.52e-07	0.200684
Resident Licence	-4.54354			-0.440906	-0.105783	-0.203637	-0.03039			26.175	6.2e-07	0.18361
Resident Licence	-4.57759			-0.349331	-0.0558253	-0.234888	-0.0454149	0.206051		26.8478	4.43e-07	0.190831
Resident Licence	-4.40499	0.203747						0.363376	-0.150812	27.1009	3.9e-07	0.174309
Resident Licence	-4.47043			-0.471383	-0.0189366			0.226057	-0.141771	27.1513	3.81e-07	0.182391
Resident Licence	-4.61377					-0.312618				27.2296	3.66e-07	0.15761
Resident Licence	-4.49045			-0.30655	-0.0340937	-0.312928	0.00636474	0.311548	-0.175708	28.2274	2.22e-07	0.197121
Resident Licence	-4.612	0.164952				-0.31114				28.4234	2.02e-07	0.164395
Resident Licence	-4.54403							0.244197		28.5971	1.85e-07	0.155847
Resident Licence	-4.3804							0.336915	-0.179444	28.6931	1.76e-07	0.164051
Resident Licence	-4.49484	0.281163	-0.0491007					0.281081		30.8082	6.12e-08	0.169615
Resident Licence	-4.34757	0.269139	-0.0553913					0.356353	-0.153815	32.5674	2.54e-08	0.175591
Resident Licence	-4.53629	0.261437	-0.0773057			-0.309462				32.8397	2.22e-08	0.167032
Resident Licence	-4.53198									33.0986	1.95e-08	0.141548
Resident Licence	-4.61047					-0.308931	-0.00309281			33.7101	1.43e-08	0.157613
Resident Licence	-4.52965	0.170618								33.8705	1.32e-08	0.149012
Resident Licence	-4.63524	0.16941				-0.337311	0.021662			34.7739	8.42e-09	0.164565
Resident Licence	-4.45185	0.267606	-0.0798662							38.1391	1.57e-09	0.151889
Resident Licence	-4.55764	0.264835	-0.0769179			-0.333244	0.0194726			39.2157	9.14e-10	0.167168
Non-resident licence, male	-5.79108							0.98218	-0.399857	0	0.80259	0.191808
Non-resident licence, male	-5.82713	0.157207						0.99843	-0.359037	4.71764	0.0758703	0.193986
Non-resident licence, male	-5.79552					-0.115492		1.00148	-0.414509	5.7037	0.0463395	0.19277
Non-resident licence, male	-5.7963			-0.032708				0.973272	-0.399416	6.464	0.031685	0.191831
Non-resident licence, male	-5.7134	0.2997	-0.143814					0.992052	-0.343075	9.14535	0.008291	0.196515
Non-resident licence, male	-6.07618							0.692659		9.6287	0.00651101	0.17165
Non-resident licence, male	-5.83911	0.186311				-0.156035		1.0288	-0.370645	9.85026	0.00582824	0.195649
Non-resident licence, male	-5.92593					-0.31348	0.142917	1.00171	-0.453559	10.2231	0.00483691	0.19519
Non-resident licence, male	-6.08538	0.266735						0.772686		10.4234	0.00437604	0.178823
Non-resident licence, male	-5.67023			0.186518	-0.177546			0.90618	-0.34589	10.8682	0.00350345	0.194396
Non-resident licence, male	-5.84242	0.164351		-0.0818988				0.977454	-0.355356	11.0743	0.00316046	0.194142
Non-resident licence, male	-5.7851			0.0630448		-0.131552		1.02184	-0.417921	12.1115	0.00188154	0.192863
Non-resident licence, male	-5.93638	0.424546	-0.170308					0.761694		14.0515	0.000713278	0.1824
Non-resident licence, male	-5.72023	0.339188	-0.152503			-0.16886		1.02514	-0.354682	14.0726	0.000705794	0.198425
Non-resident licence, male	-5.96276	0.180344				-0.339293	0.135918	1.03002	-0.406589	14.5512	0.000555559	0.197838
Non-resident licence, male	-5.79949			0.31395	-0.312363			0.625898		14.9304	0.00045963	0.181301
Non-resident licence, male	-5.72543	0.304313	-0.142123	-0.0594089				0.977002	-0.340545	15.5626	0.000335055	0.196596
Non-resident licence, male	-5.63077			0.363757	-0.212831	-0.190055		0.965732	-0.361862	15.6968	0.000313318	0.196432
Non-resident licence, male	-6.08464			-0.0567358				0.677638		16.0512	0.000262429	0.171727
Non-resident licence, male	-6.07896					-0.0189294		0.694212		16.0927	0.00025704	0.171674
Non-resident licence, male	-6.10061	0.292994				-0.113351		0.793129		16.258	0.000236652	0.179637
Non-resident licence, male	-5.8339	0.184921		0.0313714		-0.163942		1.0387	-0.372338	16.3131	0.000230228	0.195674
Non-resident licence, male	-6.10835	0.28035		-0.152733				0.737765		16.4539	0.000214577	0.179392
Non-resident licence, male	-5.73299	0.117453		0.0994732	-0.136251			0.922944	-0.327118	16.4769	0.000212119	0.195472
Non-resident licence, male	-5.91661			0.0581393		-0.32747	0.142451	1.02081	-0.456037	16.6388	0.000195621	0.195273
Non-resident licence, male	-5.84634	0.332357	-0.150398			-0.348397	0.133874	1.02695	-0.387484	18.8428	6.5e-05	0.200521
Non-resident licence, male	-5.88494	0.176728		0.164702	-0.236997			0.671379		19.3304	5.09e-05	0.183904
Non-resident licence, male	-5.94822	0.460232	-0.177291			-0.129276		0.784442		19.6977	4.24e-05	0.183446
Non-resident licence, male	-5.95825	0.43642	-0.16748	-0.134416				0.731891		20.1843	3.32e-05	0.182838
Non-resident licence, male	-5.70828	0.337389	-0.154727	0.0592001		-0.182795		1.04353	-0.358631	20.4843	2.86e-05	0.198512
Non-resident licence, male	-5.77857			0.446862	-0.340108	-0.136889		0.663394		20.6501	2.63e-05	0.182256
Non-resident licence, male	-5.75778			0.335405	-0.19813	-0.355714	0.125613	0.966611	-0.399739	20.6596	2.62e-05	0.198297
Non-resident licence, male	-5.95773	0.179126		0.0261831		-0.345032	0.135639	1.03842	-0.408326	21.0194	2.19e-05	0.197856
Non-resident licence, male	-5.69785	0.128201		0.276923	-0.16875	-0.199451		0.985974	-0.341626	21.1659	2.03e-05	0.197677
Non-resident licence, male	-5.6482	0.252864	-0.127725	0.0847343	-0.110313			0.932371	-0.320184	21.3488	1.86e-05	0.197452
Non-resident licence, male	-6.08486			-0.0535371		-0.00464738		0.678761		22.5333	1.03e-05	0.171728
Non-resident licence, male	-6.09627					-0.0371942	0.0158441	0.691469		22.5543	1.02e-05	0.171701
Non-resident licence, male	-6.1113	0.295663		-0.0897086		-0.0899031		0.767666		22.6075	9.89e-06	0.179805
Non-resident licence, male	-6.13895	0.296086				-0.154881	0.0353597	0.788928		22.6288	9.79e-06	0.179778
Non-resident licence, male	-5.79799	0.317531	-0.132435	0.134193	-0.203801			0.674934		24.1002	4.69e-06	0.18604
Non-resident licence, male	-5.86636	0.189291		0.309358	-0.263155	-0.159676		0.718144		24.7967	3.31e-06	0.185172
Non-resident licence, male	-5.83527	0.330494	-0.15233	0.0524861		-0.359442	0.133198	1.04348	-0.390792	25.2673	2.62e-06	0.200593
Non-resident licence, male	-5.60669	0.27316	-0.137324	0.262459	-0.142536	-0.210408		0.997893	-0.335849	25.818	1.99e-06	0.19992
Non-resident licence, male	-5.76643			-0.0429911	-0.382859					25.9022	1.91e-06	0.159156
Non-resident licence, male	-5.99659	0.465685	-0.17948			-0.183768	0.0460797	0.779265		25.994	1.82e-06	0.183679
Non-resident licence, male	-5.9563	0.461916	-0.175489	-0.0584232		-0.11474		0.768365		26.123	1.71e-06	0.183518
Non-resident licence, male	-5.82309	0.127424		0.249401	-0.154686	-0.361476	0.12423	0.98817	-0.377794	26.1589	1.68e-06	0.199502
Non-resident licence, male	-5.79917			0.444645	-0.340247	-0.158007	0.018574	0.65833		27.1019	1.05e-06	0.182295
Non-resident licence, male	-6.15239	0.298918		-0.092773		-0.133365	0.0374609	0.762274		28.9663	4.12e-07	0.179961
Non-resident licence, male	-6.10328			-0.0546548		-0.0236106	0.016711	0.675433		28.9925	4.06e-07	0.171758
Non-resident licence, male	-5.77529	0.336811	-0.138995	0.281685	-0.23023	-0.170209		0.723448		29.4154	3.29e-07	0.187492
Non-resident licence, male	-6.03398									29.5733	3.04e-07	0.137491
Non-resident licence, male	-6.11925			-0.549842						30.2442	2.17e-07	0.145123
Non-resident licence, male	-5.73366	0.273109	-0.137416	0.236446	-0.129679	-0.37264	0.124483	1.0004	-0.368974	30.8142	1.63e-07	0.201737
Non-resident licence, male	-5.90042	0.191954		0.303804	-0.262112	-0.193726	0.0297316	0.711968		31.1986	1.35e-07	0.185274
Non-resident licence, male	-5.7727			-0.104525	-0.36847	0.0724003				32.1683	8.3e-08	0.159435
Non-resident licence, male	-5.78908	0.053047		-0.0937271	-0.363997					32.1746	8.28e-08	0.159427
Non-resident licence, male	-6.00686	0.467578	-0.17755	-0.0625836		-0.170104	0.0475164	0.762038		32.4088	7.36e-08	0.183764
Non-resident licence, male	-6.13561	0.171927		-0.647203						34.3994	2.72e-08	0.14816
Non-resident licence, male	-6.1			-0.664175		0.194441				34.9919	2.02e-08	0.147388
Non-resident licence, male	-6.0352	0.0925316								35.3523	1.69e-08	0.138419
Non-resident licence, male	-5.81802	0.342331	-0.141029	0.273937	-0.228302	-0.214417	0.0383351	0.71638		35.7653	1.37e-08	0.187657
Non-resident licence, male	-6.02159					0.0668846				35.8282	1.33e-08	0.137792
Non-resident licence, male	-5.70784	0.176166	-0.11629	-0.112191	-0.337939					37.25	6.54e-09	0.161234
Non-resident licence, male	-5.89176			-0.0623263	-0.37345	-0.0729591	0.109405			37.4453	5.93e-09	0.160984
Non-resident licence, male	-5.98273	0.329905	-0.166391	-0.614909						38.0422	4.4e-09	0.151851
Non-resident licence, male	-5.86818	0.267497	-0.189699							38.1198	4.24e-09	0.1433
Non-resident licence, male	-5.79514	0.0530277		-0.155215	-0.349681	0.0726486				38.4403	3.61e-09	0.159706
Non-resident licence, male	-6.11642	0.15749		-0.742172		0.175711				39.5139	2.11e-09	0.149941
Non-resident licence, male	-6.21093			-0.634705		0.0687398	0.0983229			40.5503	1.26e-09	0.148593
Non-resident licence, male	-6.16603					-0.0866188	0.124039			40.7709	1.13e-09	0.139821
Non-resident licence, male	-6.02562	0.0862836				0.0510664				41.7103	7.03e-10	0.138584
Non-resident licence, male	-5.97777	0.306607	-0.154023	-0.694974		0.147829				43.5743	2.77e-10	0.153084
Non-resident licence, male	-5.71442	0.173075	-0.113492	-0.161576	-0.326941	0.0603797				43.5847	2.76e-10	0.161425
Non-resident licence, male	-5.92191	0.0617452		-0.120831	-0.351593	-0.076899	0.112791			43.6446	2.67e-10	0.161348
Non-resident licence, male	-5.86395	0.262013	-0.18791			0.0308984				44.5591	1.69e-10	0.143358
Non-resident licence, male	-6.24273	0.167672		-0.714015		0.0327668	0.11062			44.8211	1.48e-10	0.151468
Non-resident licence, male	-6.18025	0.0999345				-0.115149	0.13199			46.4513	6.57e-11	0.140876
Non-resident licence, male	-5.84387	0.183991	-0.115655	-0.129714	-0.328095	-0.0935458	0.115514			48.7363	2.1e-11	0.16313
Non-resident licence, male	-6.10792	0.319276	-0.156966	-0.667951		-0.00271088	0.115475			48.7846	2.05e-11	0.154731
Non-resident licence, male	-6.02047	0.275467	-0.188361			-0.138926	0.133103			49.2858	1.59e-11	0.145655

## Sheet: 2000s
Table S3. Models to predict the harvest of caribou in Newfoundland, 2000-2009. The regression coefficients are shown for each variable in the model. Variables not in the models appear as blank entries.
Harvest type	Intercept	Proportion of lichen cover	Proportion of lichen cover squared	Distance to cutblocks	Distance to cutblocks squared	Distance to power lines	Distance to power lines squared	Distance to towns	Distance to towns squared	ΔAIC	AIC weight	R²
Total harvest	-4.37977	0.283354		-0.554912	0.239812	-0.228069		0.268766		0	0.331511	0.239451
Total harvest	-4.448	0.262882		-0.466937	0.202929	-0.343021	0.102152	0.274575		0.0257946	0.327263	0.246923
Total harvest	-4.37291	0.221624		-0.455726	0.217465	-0.373312	0.109371	0.337279	-0.107283	1.27501	0.17524	0.252926
Total harvest	-4.30724	0.247105		-0.550941	0.25534	-0.24719		0.325562	-0.097385	2.12591	0.114515	0.244501
Total harvest	-4.42636	0.292354	-0.0255544	-0.468465	0.205421	-0.346344	0.102858	0.273535		6.07072	0.0159316	0.247427
Total harvest	-4.35984	0.309996	-0.0229496	-0.556868	0.242316	-0.230096		0.267777		6.12991	0.015467	0.239861
Total harvest	-4.35296	0.249531	-0.0240834	-0.456661	0.219558	-0.376549	0.110156	0.336571	-0.106652	7.36425	0.00834394	0.253375
Total harvest	-4.28958	0.271582	-0.0208897	-0.552405	0.257407	-0.248941		0.324723	-0.0966215	8.31279	0.00519276	0.244843
Total harvest	-4.31195			-0.288522	0.196236	-0.437878	0.13521	0.367655	-0.163163	9.13554	0.00344144	0.23636
Total harvest	-4.26923	0.221556		-0.168254		-0.374441	0.152344	0.193233		12.2744	0.000716391	0.225042
Total harvest	-4.16232					-0.461872	0.17934	0.286312	-0.130547	13.52	0.000384303	0.215829
Total harvest	-4.27091	0.133834				-0.437044	0.17603	0.246185		13.5606	0.000376576	0.21578
Total harvest	-4.21837			-0.381624	0.238474	-0.286428		0.355707	-0.158457	13.9423	0.000311145	0.223063
Total harvest	-4.18299	0.109264				-0.458502	0.181784	0.294092	-0.105748	14.6876	0.000214348	0.222177
Total harvest	-4.30356	0.282781		-0.53969	0.164886	-0.190233				14.7945	0.000203191	0.214299
Total harvest	-4.30335	0.323288		-0.579737	0.214668			0.220734		14.9504	0.000187954	0.214112
Total harvest	-4.27035					-0.434097	0.170918	0.221907		15.5962	0.000136093	0.205499
Total harvest	-4.36612	0.265029		-0.460613	0.130902	-0.293771	0.094602			15.7386	0.00012674	0.220926
Total harvest	-4.41859			-0.250747	0.164905	-0.405915	0.130625	0.273348		15.7425	0.000126489	0.220921
Total harvest	-4.20401	0.189105		-0.141904		-0.399552	0.160122	0.236954	-0.0789394	15.9231	0.000115572	0.228393
Total harvest	-4.25357	0.236434		-0.248188		-0.324064	0.132008			18.1227	3.85e-05	0.210291
Total harvest	-4.25364	0.239951	-0.0165484	-0.166765		-0.376923	0.152938	0.19196		18.5781	3.06e-05	0.225254
Total harvest	-4.24857	0.161465	-0.0236211			-0.439265	0.176439	0.243309		19.6702	1.77e-05	0.216228
Total harvest	-4.16324			-0.0238236		-0.452609	0.175358	0.275751	-0.129283	19.7737	1.69e-05	0.216104
Total harvest	-4.32471			-0.339229	0.205919	-0.262163		0.263497		19.8169	1.65e-05	0.208242
Total harvest	-4.2602	0.305188		-0.578973	0.222759			0.25035	-0.0540337	20.0229	1.49e-05	0.215805
Total harvest	-4.27846	0.314908	-0.028613	-0.540441	0.167755	-0.193317				20.7264	1.05e-05	0.214961
Total harvest	-4.16253	0.135394	-0.0222163			-0.460649	0.182178	0.29172	-0.105171	20.8382	9.9e-06	0.222572
Total harvest	-4.29402	0.33508	-0.010337	-0.58051	0.215751			0.220256		21.3622	7.62e-06	0.214198
Total harvest	-4.33948	0.299781	-0.0311537	-0.460657	0.133667	-0.298402	0.0954867			21.568	6.87e-06	0.221704
Total harvest	-4.27012			-0.0313743		-0.422563	0.16582	0.208879		21.6791	6.5e-06	0.205985
Total harvest	-4.10258	0.238705		-0.21951		-0.189571		0.156397		22.1979	5.02e-06	0.205355
Total harvest	-4.18889	0.207143	-0.0162283	-0.140317		-0.402058	0.160724	0.235968	-0.0787872	22.2324	4.93e-06	0.228598
Total harvest	-4.24556	0.317228		-0.555914	0.151982					23.5527	2.55e-06	0.195774
Total harvest	-4.10908	0.249616		-0.281158		-0.17085				24.0847	1.95e-06	0.195119
Total harvest	-4.23085	0.262764	-0.0242229	-0.244795		-0.328214	0.133046			24.2177	1.83e-06	0.210759
Total harvest	-4.25285	0.315019	-0.00855259	-0.579552	0.223622			0.249856	-0.0536093	26.457	5.96e-07	0.215864
Total harvest	-4.05115	0.216553		-0.202985		-0.19948		0.185917	-0.0549322	27.2855	3.94e-07	0.207049
Total harvest	-4.24892					-0.399138	0.160149			28.0592	2.68e-07	0.182146
Total harvest	-4.09187	0.250788	-0.0108351	-0.218641		-0.190585		0.155439		28.6044	2.04e-07	0.205448
Total harvest	-4.25286			-0.106064		-0.371298	0.145037			29.4653	1.32e-07	0.18847
Total harvest	-4.06986	0.120457				-0.234439		0.222315		29.7667	1.14e-07	0.188096
Total harvest	-4.23116	0.334806	-0.0157878	-0.556307	0.153525					29.8687	1.08e-07	0.195979
Total harvest	-4.24782	0.0978538				-0.396576	0.162946			30.0341	9.97e-08	0.187764
Total harvest	-4.07594					-0.239135		0.201652		30.1591	9.37e-08	0.179515
Total harvest	-3.97289					-0.252467		0.257429	-0.113211	30.203	9.16e-08	0.187554
Total harvest	-4.06984	0.285927		-0.318638						30.2106	9.13e-08	0.179451
Total harvest	-4.09109	0.269426	-0.0181399	-0.278787		-0.172834				30.3515	8.51e-08	0.195386
Total harvest	-4.06157	0.280695		-0.274955				0.125501		31.0444	6.02e-08	0.186508
Total harvest	-4.33729			-0.246822	0.0964023	-0.354389	0.120985			31.1883	5.6e-08	0.194355
Total harvest	-3.98823	0.0992038				-0.24557		0.263486	-0.0906828	32.3141	3.19e-08	0.192967
Total harvest	-4.04118	0.228032	-0.0102538	-0.20214		-0.20043		0.185067	-0.0547558	33.6996	1.59e-08	0.207132
Total harvest	-4.25228			-0.327275	0.135226	-0.224946				33.7223	1.58e-08	0.183171
Total harvest	-4.08986			-0.0762482		-0.226338		0.171046		34.1231	1.29e-08	0.18267
Total harvest	-3.98868			-0.0724854		-0.239843		0.226918	-0.110736	34.4086	1.12e-08	0.190379
Total harvest	-4.2085	0.147198	-0.0418035			-0.400651	0.163491			35.307	7.14e-09	0.189266
Total harvest	-4.04978	0.144704	-0.0206608			-0.235515		0.219463		35.9653	5.14e-09	0.188449
Total harvest	-4.06386	0.292298	-0.00585091	-0.317918						36.6708	3.61e-09	0.17948
Total harvest	-4.03967	0.27261		-0.26934				0.13688	-0.0224407	37.2838	2.66e-09	0.186811
Total harvest	-4.09579			-0.134907		-0.207217				37.509	2.37e-09	0.170243
Total harvest	-4.06243	0.279766	0.000849755	-0.275012				0.125589		37.5271	2.35e-09	0.186509
Total harvest	-3.97015	0.12181	-0.0191312			-0.246555		0.261041	-0.0901324	38.5513	1.41e-09	0.193271
Total harvest	-4.06896					-0.221332				39.6896	7.98e-10	0.159178
Total harvest	-4.06423	0.0886368				-0.215454				42.489	1.97e-10	0.1639
Total harvest	-4.14327			-0.366019	0.19692			0.271571	-0.120614	42.5105	1.95e-10	0.180286
Total harvest	-4.22938			-0.332569	0.172786			0.204603		43.3366	1.29e-10	0.171074
Total harvest	-4.04105	0.271045	0.00140531	-0.269442				0.137034	-0.0224916	43.7657	1.04e-10	0.186813
Total harvest	-4.0075	0.133323						0.192614		47.8549	1.35e-11	0.157012
Total harvest	-4.02622	0.135318	-0.0394087			-0.217911				47.9038	1.31e-11	0.165265
Total harvest	-4.17797			-0.315695	0.116969					49.883	4.88e-12	0.154394
Total harvest	-4.01309							0.17059		49.9231	4.78e-12	0.145917
Total harvest	-4.04566			-0.15202						50.7545	3.16e-12	0.144831
Total harvest	-4.03786			-0.110898				0.1335		50.9198	2.91e-12	0.153052
Total harvest	-3.9499	0.120134						0.220015	-0.06144	52.487	1.33e-12	0.159394
Total harvest	-3.93128							0.212194	-0.0864971	52.5983	1.26e-12	0.150876
Total harvest	-3.95736			-0.110172				0.174855	-0.0852721	53.6593	7.39e-13	0.157886
Total harvest	-3.99399	0.149051	-0.0136372					0.190592		54.2144	5.6e-13	0.157171
Total harvest	-4.01131									55.18	3.45e-13	0.130447
Total harvest	-4.00715	0.106892								56.1829	2.09e-13	0.137703
Total harvest	-3.93846	0.134159	-0.0120565					0.218251	-0.0609316	58.8731	5.45e-14	0.159519
Total harvest	-3.97631	0.143419	-0.0312965							61.9946	1.14e-14	0.138588
Resident licence, male	-5.29274	0.2336		-0.542625	0.223867	-0.47472	0.168956			0	0.484358	0.240346
Resident licence, male	-5.31766	0.233063		-0.542443	0.248472	-0.490712	0.172001	0.103466		4.03351	0.0644614	0.243186
Resident licence, male	-5.2731	0.26044	-0.0223951	-0.542889	0.225524	-0.477523	0.169889			6.23248	0.0214685	0.240637
Resident licence, male	-5.16469	0.262244		-0.67334	0.279917	-0.273798				6.70587	0.0169436	0.224871
Resident licence, male	-5.26733			-0.361129	0.190751	-0.531578	0.191782			6.96622	0.0148755	0.224562
Resident licence, male	-5.07952					-0.581319	0.244104			9.97315	0.00330768	0.20539
Resident licence, male	-5.30081	0.255979	-0.0189245	-0.543032	0.24966	-0.49274	0.172722	0.102134		10.338	0.00275607	0.243393
Resident licence, male	-5.33792	0.241917		-0.547168	0.246259	-0.486263	0.170592	0.0895997	0.0244168	10.3414	0.00275148	0.243389
Resident licence, male	-5.29134			-0.359624	0.213569	-0.547864	0.195441	0.100984		11.1058	0.00187749	0.227336
Resident licence, male	-5.18599	0.262801		-0.676745	0.304303	-0.284248		0.0942839		11.1493	0.0018371	0.227284
Resident licence, male	-5.07973	0.183117		-0.175483		-0.522757	0.224876			12.5325	0.000919973	0.217934
Resident licence, male	-5.15009	0.28143	-0.0158615	-0.674008	0.281273	-0.274734				13.0624	0.000705823	0.225021
Resident licence, male	-5.0762	0.0896856				-0.575432	0.246366			13.6555	0.000524698	0.208785
Resident licence, male	-5.08271			-0.0761761		-0.561838	0.233529			14.43	0.000356226	0.207848
Resident licence, male	-5.08194					-0.588865	0.246337	0.056153		15.529	0.000205634	0.206516
Resident licence, male	-5.32091	0.263437	-0.0180892	-0.547584	0.247509	-0.488394	0.17133	0.0888855	0.0233069	16.6618	0.000116706	0.243577
Resident licence, male	-5.25815			-0.364743	0.219967	-0.551969	0.196295	0.125021	-0.0424511	17.0009	9.85e-05	0.22803
Resident licence, male	-5.21951	0.276481		-0.682542	0.300235	-0.28021		0.0723642	0.0382495	17.2001	8.92e-05	0.227795
Resident licence, male	-5.11473			-0.481133	0.246806	-0.309333				17.4413	7.9e-05	0.204192
Resident licence, male	-5.17402	0.278512	-0.0128694	-0.677487	0.305249	-0.284839		0.0934246		17.5491	7.49e-05	0.227383
Resident licence, male	-5.0789	0.0996734				-0.585052	0.249557	0.0730419		18.5961	4.44e-05	0.210649
Resident licence, male	-5.0647	0.201238	-0.0156716	-0.173748		-0.525055	0.225484			18.8953	3.82e-05	0.218078
Resident licence, male	-5.0802	0.181852		-0.168465		-0.526794	0.226512	0.0174148		18.9401	3.74e-05	0.218024
Resident licence, male	-5.0505	0.122513	-0.0267696			-0.577825	0.246885			19.7775	2.46e-05	0.209222
Resident licence, male	-5.0835			-0.0659231		-0.568014	0.236098	0.0286277		20.7091	1.54e-05	0.208095
Resident licence, male	-5.06944					-0.590129	0.246833	0.062729	-0.0135113	21.9509	8.29e-06	0.20659
Resident licence, male	-5.13355			-0.482738	0.268381	-0.319033		0.0875017		22.1603	7.47e-06	0.206336
Resident licence, male	-5.2081	0.29059	-0.0117224	-0.683196	0.30118	-0.280831		0.0718522	0.0376431	23.6143	3.61e-06	0.227876
Resident licence, male	-5.12721	0.201086		-0.186392		-0.516153	0.222668	-0.0113771	0.0510159	24.6601	2.14e-06	0.218936
Resident licence, male	-5.06602	0.318237		-0.683694	0.260054					24.8137	1.98e-06	0.19517
Resident licence, male	-5.05835	0.125434	-0.0212971			-0.586649	0.249871	0.0702685		24.854	1.94e-06	0.210921
Resident licence, male	-5.08643	0.101308				-0.584251	0.249323	0.0693381	0.00817298	25.0583	1.75e-06	0.210675
Resident licence, male	-5.06584	0.199235	-0.0149331	-0.16737		-0.528665	0.226963	0.0160838		25.3144	1.54e-06	0.218155
Resident licence, male	-5.07737			-0.0651426		-0.568843	0.23646	0.0321652	-0.00660931	27.1775	6.08e-07	0.208113
Resident licence, male	-5.10339			-0.488352	0.27455	-0.321497		0.109465	-0.0379658	28.1729	3.69e-07	0.206907
Resident licence, male	-5.0762	0.319287		-0.687862	0.273153			0.0486455		30.7351	1.03e-07	0.195861
Resident licence, male	-5.11419	0.215426	-0.0126098	-0.185188		-0.517935	0.223123	-0.012061	0.0500392	31.0659	8.7e-08	0.219029
Resident licence, male	-5.06123	0.324226	-0.00512774	-0.683875	0.260553					31.2836	7.8e-08	0.195187
Resident licence, male	-5.06505	0.126498	-0.0210259			-0.585952	0.24967	0.0671185	0.00697066	31.3221	7.65e-08	0.210939
Resident licence, male	-4.81295	0.198618		-0.22239		-0.236857				33.2136	2.97e-08	0.184767
Resident licence, male	-4.78436					-0.282494				35.3322	1.03e-08	0.165744
Resident licence, male	-5.13921	0.342588		-0.697517	0.265734			0.00971205	0.0698011	35.7356	8.42e-09	0.197682
Resident licence, male	-4.80889			-0.118291		-0.271689				36.5526	5.6e-09	0.172431
Resident licence, male	-5.07257	0.323796	-0.00384906	-0.688018	0.273483			0.0484414		37.2108	4.03e-09	0.195871
Resident licence, male	-4.8157	0.200727		-0.233995		-0.234134		-0.0296881		39.4703	1.3e-09	0.185049
Resident licence, male	-4.80604	0.206511	-0.00680423	-0.221705		-0.237405				39.6739	1.18e-09	0.184795
Resident licence, male	-4.77807	0.0756825				-0.273806				39.8363	1.08e-09	0.168265
Resident licence, male	-4.7838					-0.284417		0.0335075		41.4759	4.77e-10	0.166177
Resident licence, male	-5.1374	0.34462	-0.0017232	-0.697552	0.265857			0.00966808	0.069654	42.2171	3.29e-10	0.197684
Resident licence, male	-4.8105			-0.124643		-0.270213		-0.0182936		42.9501	2.28e-10	0.172539
Resident licence, male	-4.89574	0.230552		-0.260453		-0.226518		-0.0745091	0.0792595	44.1035	1.28e-10	0.187351
Resident licence, male	-4.99725			-0.452	0.221343					44.3574	1.13e-10	0.162495
Resident licence, male	-4.77672	0.0819938				-0.276294		0.0466338		45.6701	5.86e-11	0.16909
Resident licence, male	-4.74988	0.260536		-0.274062						45.8177	5.44e-11	0.160623
Resident licence, male	-4.80742	0.210304	-0.00822943	-0.233429		-0.23474		-0.0304233		45.9203	5.17e-11	0.18509
Resident licence, male	-4.75617	0.102718	-0.0219903			-0.274659				46.0761	4.78e-11	0.168574
Resident licence, male	-4.78536					-0.284689		0.0326699	0.00157347	47.9583	1.87e-11	0.166178
Resident licence, male	-4.82459			-0.126117		-0.26975		-0.0258772	0.0141173	49.3686	9.22e-12	0.172621
Resident licence, male	-5.00395			-0.454136	0.230036			0.033727		50.5679	5.06e-12	0.162844
Resident licence, male	-4.89074	0.235821	-0.00462705	-0.260065		-0.226885		-0.0747983	0.0789186	50.576	5.04e-12	0.187364
Resident licence, male	-4.75661	0.263402		-0.2945				-0.0584824		51.3917	3.35e-12	0.161789
Resident licence, male	-4.75859	0.104123	-0.0182621			-0.276872		0.0440914		51.9879	2.49e-12	0.1693
Resident licence, male	-4.79571	0.0859441				-0.275386		0.0374567	0.0197427	52.0314	2.44e-12	0.169245
Resident licence, male	-4.75662	0.253246	0.00647247	-0.274717						52.2815	2.15e-12	0.160648
Resident licence, male	-4.86262	0.29906		-0.326133				-0.114952	0.102862	54.6688	6.52e-13	0.165888
Resident licence, male	-4.98915			-0.456939	0.232952			0.0440472	-0.0181716	56.9419	2.09e-13	0.162984
Resident licence, male	-4.73374			-0.138427						57.0102	2.02e-13	0.137628
Resident licence, male	-4.70179									57.538	1.55e-13	0.128334
Resident licence, male	-4.76047	0.259163	0.00371891	-0.294812				-0.058169		57.8686	1.32e-13	0.161797
Resident licence, male	-4.77729	0.106988	-0.0175458			-0.275972		0.0354456	0.0186899	58.3622	1.03e-13	0.169439
Resident licence, male	-4.6954	0.114693								59.3587	6.25e-14	0.134526
Resident licence, male	-4.87146	0.290094	0.00798506	-0.32683				-0.114406	0.103428	61.1228	2.59e-14	0.165925
Resident licence, male	-4.7392			-0.154162				-0.0506102		62.8164	1.11e-14	0.13852
Resident licence, male	-4.70163							0.00420715		64.0158	6.09e-15	0.128341
Resident licence, male	-4.69426	0.117692						0.0230376		65.6815	2.65e-15	0.134738
Resident licence, male	-4.6797	0.133248	-0.0155036							65.7216	2.59e-15	0.134685
Resident licence, male	-4.76237			-0.156147				-0.0627329	0.0230676	69.1243	4.73e-16	0.138751
Resident licence, male	-4.71223							-0.00116035	0.0107448	70.4621	2.42e-16	0.12839
Resident licence, male	-4.72877	0.124152						0.00643187	0.0353734	71.7683	1.26e-16	0.135262
Resident licence, male	-4.68055	0.133757	-0.0136295					0.0210537		72.073	1.08e-16	0.134859
Resident licence, male	-4.71548	0.138761	-0.012465					0.00491025	0.0346098	78.1751	5.12e-18	0.135363
Resident licence, female	-6.07471	0.299346		-0.713618	0.342979	-0.538578	0.172399	0.270216		0	0.68038	0.178065
Resident licence, female	-5.94415	0.333644		-0.858364	0.39796	-0.339209		0.266749		3.3078	0.130158	0.165668
Resident licence, female	-5.98359	0.316947		-0.694259	0.263098	-0.489675	0.169214			4.89632	0.0588205	0.163639
Resident licence, female	-6.08798	0.277809	0.016089	-0.711663	0.341524	-0.535916	0.17124	0.271867		6.38432	0.0279521	0.178189
Resident licence, female	-6.06101	0.29275		-0.710946	0.344827	-0.542023	0.173298	0.280415	-0.0169867	6.41964	0.0274629	0.178145
Resident licence, female	-5.85411	0.348835		-0.83183	0.315471	-0.297103				7.89419	0.0131386	0.151426
Resident licence, female	-6.03222			-0.457692	0.301514	-0.609238	0.203399	0.286384		8.55427	0.00944528	0.158948
Resident licence, female	-5.96806	0.296965	0.0270802	-0.853337	0.394704	-0.337567		0.269516		9.51016	0.00585662	0.166026
Resident licence, female	-5.94018	0.331897		-0.857806	0.398551	-0.340082		0.269563	-0.0046936	9.78601	0.00510208	0.165674
Resident licence, female	-5.98639	0.312413	0.00346235	-0.693975	0.262732	-0.489016	0.168953			11.3751	0.00230509	0.163644
Resident licence, female	-6.07462	0.272523	0.0154311	-0.709295	0.34333	-0.53923	0.172115	0.281299	-0.0159009	12.812	0.00112373	0.178259
Resident licence, female	-5.96121			-0.476812	0.317478	-0.620465	0.204625	0.34084	-0.0951176	12.8299	0.00111374	0.161782
Resident licence, female	-5.8669	0.32954	0.0146247	-0.829759	0.313544	-0.295934				14.2949	0.000535363	0.151533
Resident licence, female	-5.9334			-0.426343	0.217138	-0.558405	0.199643			14.9842	0.000379291	0.142176
Resident licence, female	-5.86905			-0.591537	0.358565	-0.380653		0.28125		15.8785	0.000242542	0.141003
Resident licence, female	-5.96519	0.295958	0.0269366	-0.852995	0.39515	-0.338275		0.271435	-0.00326932	15.9909	0.000229284	0.166029
Resident licence, female	-5.7273	0.259789		-0.267322		-0.531315	0.22897			16.3374	0.000192806	0.1404
Resident licence, female	-5.73122					-0.633546	0.263889	0.179434		16.8718	0.000147598	0.131126
Resident licence, female	-5.71796					-0.60443	0.259976			17.2517	0.000122067	0.12196
Resident licence, female	-5.73594	0.122799				-0.635051	0.270512	0.19414		19.4618	4.04e-05	0.136283
Resident licence, female	-5.73494	0.240834		-0.211672		-0.564187	0.239741	0.129208		19.7787	3.45e-05	0.144388
Resident licence, female	-5.79831			-0.612089	0.374574	-0.389552		0.335667	-0.0934061	20.2309	2.75e-05	0.143797
Resident licence, female	-5.72095	0.104879				-0.601986	0.265171			20.9424	1.93e-05	0.125701
Resident licence, female	-5.72007			-0.105941		-0.580522	0.242802			20.9599	1.91e-05	0.125678
Resident licence, female	-5.73035	0.401008		-0.811465	0.287004					21.0652	1.81e-05	0.125537
Resident licence, female	-5.78633	0.395041		-0.837608	0.34448			0.183343		21.7391	1.29e-05	0.13327
Resident licence, female	-5.77259			-0.553885	0.271672	-0.337554				21.8051	1.25e-05	0.124547
Resident licence, female	-5.74225	0.239543	0.0162511	-0.269089		-0.52792	0.227589			22.7216	7.92e-06	0.14053
Resident licence, female	-5.73032			-0.0521941		-0.616791	0.254808	0.159352		22.7501	7.81e-06	0.131929
Resident licence, female	-5.68653					-0.639416	0.265555	0.203583	-0.0483511	22.7722	7.72e-06	0.1319
Resident licence, female	-5.7551	0.0956133	0.0205902			-0.632162	0.269291	0.197584		25.7829	1.71e-06	0.136497
Resident licence, female	-5.71587	0.118177				-0.63754	0.270994	0.204417	-0.021522	25.8354	1.67e-06	0.136428
Resident licence, female	-5.75859	0.208259	0.0255755	-0.212719		-0.559677	0.237845	0.132791		26.0193	1.52e-06	0.144706
Resident licence, female	-5.75507	0.249681		-0.21926		-0.559402	0.238215	0.116555	0.0216258	26.158	1.42e-06	0.144524
Resident licence, female	-5.75546	0.366069	0.0272993	-0.80881	0.283581					27.2645	8.17e-07	0.125917
Resident licence, female	-5.72224	0.103013	0.00137355			-0.601796	0.2651			27.4249	7.54e-07	0.125702
Resident licence, female	-5.82157	0.345484	0.0379626	-0.832731	0.340392			0.187767		27.6761	6.65e-07	0.133994
Resident licence, female	-5.81928	0.407931		-0.84196	0.340514			0.163219	0.0363238	27.9174	5.9e-07	0.133674
Resident licence, female	-5.68823			-0.0493665		-0.623047	0.256836	0.183218	-0.0455697	28.7163	3.95e-07	0.132615
Resident licence, female	-5.46364	0.288347		-0.342451		-0.256995				28.8378	3.72e-07	0.115082
Resident licence, female	-5.73562	0.0927599	0.0195308			-0.634553	0.269787	0.206804	-0.0198152	32.1737	7.02e-08	0.136619
Resident licence, female	-5.78246	0.216366	0.0269754	-0.221194		-0.554116	0.236051	0.118934	0.0242463	32.3732	6.35e-08	0.144874
Resident licence, female	-5.85702	0.357532	0.0390353	-0.836863	0.336024			0.167026	0.0381202	33.8259	3.07e-08	0.134435
Resident licence, female	-5.46	0.27637		-0.30735		-0.268438		0.0873698		33.8814	2.99e-08	0.117028
Resident licence, female	-5.50028	0.244022	0.0353958	-0.345608		-0.254339				34.854	1.84e-08	0.115714
Resident licence, female	-5.44071			-0.16471		-0.294947				35.8582	1.11e-08	0.0966211
Resident licence, female	-5.40446					-0.298228				36.5299	7.95e-09	0.0866839
Resident licence, female	-5.41126					-0.318296		0.164826		37.0938	6e-09	0.0949128
Resident licence, female	-5.38712	0.338932		-0.373845						37.3332	5.32e-09	0.0945814
Resident licence, female	-5.43701			-0.126866		-0.308757		0.118185		39.6823	1.64e-09	0.100287
Resident licence, female	-5.50417	0.221237	0.0430433	-0.308447		-0.265666		0.0941921		39.6856	1.64e-09	0.117944
Resident licence, female	-5.50679	0.29512		-0.322715		-0.262367		0.0603292	0.0462064	39.885	1.49e-09	0.117675
Resident licence, female	-5.40752	0.0957648				-0.311539		0.17547		41.2	7.7e-10	0.0981963
Resident licence, female	-5.40103	0.0801592				-0.290697				41.3763	7.05e-10	0.0889666
Resident licence, female	-5.61682			-0.475438	0.231949					42.3578	4.31e-10	0.0875984
Resident licence, female	-5.67506			-0.506202	0.290295			0.185892		42.6984	3.64e-10	0.0961277
Resident licence, female	-5.43623	0.282439	0.0461827	-0.378634						43.0288	3.08e-10	0.095671
Resident licence, female	-5.37672					-0.321255		0.182905	-0.0355761	43.2597	2.75e-10	0.0953517
Resident licence, female	-5.38414	0.33407		-0.35883				0.0421213		43.4467	2.5e-10	0.095093
Resident licence, female	-5.55722	0.23825	0.0455133	-0.324427		-0.25966		0.0657656	0.0499468	45.6144	8.47e-11	0.118692
Resident licence, female	-5.40676			-0.125647		-0.310893		0.134462	-0.0308674	45.9252	7.25e-11	0.100617
Resident licence, female	-5.44424	0.0479382	0.0360671			-0.310728		0.182421		47.184	3.86e-11	0.0988842
Resident licence, female	-5.39381	0.0926989				-0.313303		0.182315	-0.014267	47.6339	3.08e-11	0.0982641
Resident licence, female	-5.4167	0.0594198	0.0154479			-0.290087				47.7648	2.89e-11	0.0890985
Resident licence, female	-5.6242			-0.519563	0.300808			0.219716	-0.0631062	48.1866	2.34e-11	0.0975017
Resident licence, female	-5.46233	0.36238		-0.381375				0.00146502	0.0744269	48.6495	1.86e-11	0.0968627
Resident licence, female	-5.43762	0.270623	0.0509247	-0.360818				0.0505924		48.9884	1.57e-11	0.0963947
Resident licence, female	-5.34491			-0.157185						50.426	7.64e-12	0.0670703
Resident licence, female	-5.31276									50.7305	6.56e-12	0.0573373
Resident licence, female	-5.43241	0.0460867	0.0355475			-0.311549		0.188033	-0.0117234	53.6355	1.53e-12	0.0989278
Resident licence, female	-5.31353	0.108188								54.0053	1.28e-12	0.0619504
Resident licence, female	-5.52387	0.295552	0.0546344	-0.384094				0.00907318	0.0785603	54.0608	1.24e-12	0.0983416
Resident licence, female	-5.31366							0.110464		54.2869	1.11e-12	0.0615464
Resident licence, female	-5.34101			-0.137552				0.0704819		55.845	5.08e-13	0.0685869
Resident licence, female	-5.31431	0.118709						0.123348		56.9045	2.99e-13	0.0670768
Resident licence, female	-5.33394	0.0821872	0.0198024							60.3323	5.39e-14	0.0621742
Resident licence, female	-5.29499							0.119126	-0.0185997	60.6811	4.53e-14	0.0616739
Resident licence, female	-5.32427			-0.137131				0.0785804	-0.0164926	62.2581	2.06e-14	0.0686866
Resident licence, female	-5.35297	0.0700075	0.0376276					0.13157		62.8474	1.53e-14	0.0678471
Resident licence, female	-5.32388	0.120763						0.118978	0.00962807	63.365	1.18e-14	0.0671091
Resident licence, female	-5.36603	0.0718289	0.0382365					0.126131	0.0125244	69.2934	6.11e-16	0.0679
Resident licence	-4.87148	0.247885		-0.572767	0.230775	-0.487268	0.169414			0	0.442954	0.219512
Resident licence	-4.9127	0.242805		-0.573089	0.270202	-0.512019	0.17331	0.1557		1.17684	0.24593	0.225819
Resident licence	-4.74419	0.279401		-0.710018	0.286017	-0.288992				6.07619	0.0212291	0.204379
Resident licence	-4.86256	0.260786	-0.0103117	-0.573175	0.231622	-0.488735	0.169972			6.4291	0.0177949	0.219577
Resident licence	-4.92629	0.248794		-0.576248	0.268795	-0.508858	0.172318	0.14645	0.0163526	7.58528	0.00998241	0.225907
Resident licence	-4.90871	0.248613	-0.00456401	-0.573416	0.270532	-0.512583	0.173543	0.155341		7.64922	0.00966834	0.225832
Resident licence	-4.78129	0.276387		-0.715467	0.326162	-0.305986		0.147568		7.78873	0.0090169	0.210161
Resident licence	-4.84858			-0.379749	0.197199	-0.551507	0.195524			7.90326	0.00851506	0.202153
Resident licence	-4.89132			-0.381651	0.236527	-0.577308	0.200441	0.159684		8.80858	0.00541503	0.208929
Resident licence	-4.65659					-0.606754	0.251434			11.5533	0.00137275	0.181622
Resident licence	-4.74232	0.281987	-0.00204936	-0.710187	0.286222	-0.289119				12.557	0.000831063	0.204382
Resident licence	-4.65301	0.196278		-0.192695		-0.539171	0.226971			13.0162	0.000660566	0.195891
Resident licence	-4.80865	0.287558		-0.719966	0.3229	-0.302492		0.12977	0.0311506	13.9999	0.000403935	0.21049
Resident licence	-4.92275	0.253441	-0.00374715	-0.576464	0.269097	-0.509383	0.172527	0.14633	0.0160269	14.0611	0.000391763	0.225916
Resident licence	-4.78434	0.272139	0.00329073	-0.715097	0.32587	-0.305859		0.147823		14.2667	0.000353492	0.210168
Resident licence	-4.84882			-0.388414	0.244223	-0.582807	0.201524	0.189601	-0.0538119	14.3912	0.000332161	0.210017
Resident licence	-4.65396	0.0922261				-0.601511	0.254264			15.2017	0.000221484	0.185162
Resident licence	-4.66093					-0.619449	0.254249	0.097639		15.316	0.000209188	0.18502
Resident licence	-4.65809			-0.0843381		-0.58362	0.238033			15.6594	0.000176186	0.184592
Resident licence	-4.65834	0.106153				-0.6161	0.257909	0.11362		18.0364	5.37e-05	0.189695
Resident licence	-4.6943			-0.506213	0.253537	-0.328715				18.1668	5.03e-05	0.181459
Resident licence	-4.65508	0.190528		-0.168472		-0.552912	0.232167	0.0566781		18.7255	3.8e-05	0.196842
Resident licence	-4.65062	0.199289	-0.00250813	-0.192444		-0.539592	0.227105			19.4961	2.59e-05	0.195895
Resident licence	-4.73075			-0.512305	0.292668	-0.345065		0.147472		19.9024	2.11e-05	0.18738
Resident licence	-4.81329	0.281662	0.00466658	-0.719468	0.322438	-0.302259		0.129946	0.0315322	20.4727	1.59e-05	0.210502
Resident licence	-4.6608			-0.0574895		-0.599793	0.244389	0.0735228		20.8418	1.32e-05	0.186212
Resident licence	-4.64116	0.109165	-0.0133321			-0.602926	0.254657			21.594	9.06e-06	0.185275
Resident licence	-4.64105					-0.62176	0.255058	0.108045	-0.0214815	21.6529	8.8e-06	0.185202
Resident licence	-4.65447	0.111193	-0.00402104			-0.616493	0.258025	0.11307		24.5112	2.11e-06	0.189705
Resident licence	-4.66035	0.106599				-0.615859	0.25784	0.112626	0.00217554	24.5182	2.1e-06	0.189697
Resident licence	-4.69547	0.207355		-0.183912		-0.542911	0.228669	0.0316002	0.0441144	24.6683	1.95e-06	0.197505
Resident licence	-4.65552	0.189964	0.000459313	-0.168489		-0.552855	0.232149	0.0567261		25.2086	1.49e-06	0.196842
Resident licence	-4.64083	0.343103		-0.724298	0.268073					25.5207	1.27e-06	0.172203
Resident licence	-4.69109			-0.520038	0.30038	-0.348389		0.175617	-0.0494514	25.6273	1.21e-06	0.188321
Resident licence	-4.64596			-0.0557831		-0.602028	0.245273	0.0819886	-0.0160461	27.2436	5.38e-07	0.186313
Resident licence	-4.66345	0.342911		-0.732935	0.295249			0.0950073		29.9331	1.4e-07	0.17482
Resident licence	-4.65627	0.111418	-0.00390769			-0.616273	0.257963	0.112251	0.00182976	30.9935	8.25e-08	0.189706
Resident licence	-4.69894	0.203512	0.00325722	-0.184179		-0.542383	0.228502	0.0317528	0.0444976	31.1467	7.64e-08	0.197511
Resident licence	-4.64817	0.333534	0.00785908	-0.723742	0.267212					31.9744	5.05e-08	0.17224
Resident licence	-4.38623	0.216011		-0.249574		-0.253317				32.6499	3.6e-08	0.16313
Resident licence	-4.72386	0.36504		-0.741554	0.288099			0.0578251	0.0667391	35.1237	1.05e-08	0.176449
Resident licence	-4.67372	0.329466	0.0109366	-0.73196	0.294149			0.0957045		36.3591	5.64e-09	0.174892
Resident licence	-4.38164			-0.134233		-0.291492				37.1614	3.77e-09	0.148942
Resident licence	-4.35384					-0.303072				37.1704	3.76e-09	0.140452
Resident licence	-4.39645	0.203993	0.00992801	-0.250407		-0.252592				39.0865	1.44e-09	0.16319
Resident licence	-4.38545	0.215085		-0.245618		-0.25426		0.00961103		39.1101	1.42e-09	0.163159
Resident licence	-4.73774	0.348282	0.0138385	-0.740259	0.286552			0.0583276	0.0677884	41.5164	4.28e-10	0.176563
Resident licence	-4.34783	0.0749449				-0.294848				41.7933	3.72e-10	0.142893
Resident licence	-4.35355					-0.308452		0.0784925		41.851	3.62e-10	0.142818
Resident licence	-4.3796			-0.124857		-0.293661		0.026513		43.4712	1.61e-10	0.149168
Resident licence	-4.46053	0.243185		-0.270046		-0.246392		-0.0327193	0.0743627	44.0467	1.21e-10	0.165136
Resident licence	-4.3962	0.202196	0.010548	-0.246013		-0.253607		0.0107724		45.541	5.72e-11	0.163226
Resident licence	-4.34642	0.0862654				-0.300133		0.0910778		45.8726	4.84e-11	0.146038
Resident licence	-4.31559	0.28403		-0.303523						46.7039	3.2e-11	0.136434
Resident licence	-4.56757			-0.470749	0.228329					47.6229	2.02e-11	0.135219
Resident licence	-4.34233	0.081908	-0.00544347			-0.295044				48.261	1.47e-11	0.142914
Resident licence	-4.34816					-0.309086		0.0811184	-0.00552455	48.324	1.42e-11	0.142831
Resident licence	-4.38482			-0.125345		-0.293384		0.0237435	0.00523214	49.9458	6.32e-12	0.149179
Resident licence	-4.47754	0.225263	0.0151115	-0.270984		-0.245316		-0.0317118	0.0759565	50.4241	4.98e-12	0.165271
Resident licence	-4.35991	0.0890513				-0.29978		0.0844549	0.0139077	52.2996	1.95e-12	0.146111
Resident licence	-4.34968	0.0821967	0.00322968			-0.300059		0.0915753		52.3509	1.9e-12	0.146044
Resident licence	-4.58782			-0.478347	0.252486			0.0864581		52.39	1.86e-12	0.137485
Resident licence	-4.33878	0.25814	0.0219167	-0.305492						52.9628	1.4e-12	0.13673
Resident licence	-4.31806	0.285715		-0.312117				-0.0232443		53.047	1.34e-12	0.136618
Resident licence	-4.42378	0.320884		-0.34296				-0.0797235	0.102137	56.5308	2.35e-13	0.140569
Resident licence	-4.56618			-0.48287	0.256835			0.101378	-0.0265675	58.6515	8.13e-14	0.137778
Resident licence	-4.36415	0.0839588	0.00405768			-0.299246		0.0851247	0.0141034	58.7752	7.65e-14	0.146121
Resident licence	-4.33971	0.261164	0.0206739	-0.313206				-0.0210267		59.332	5.79e-14	0.13688
Resident licence	-4.29644			-0.149974						60.003	4.14e-14	0.109913
Resident licence	-4.26215									61.4462	2.01e-14	0.09906
Resident licence	-4.45396	0.29009	0.0264773	-0.344664				-0.0775782	0.104563	62.6928	1.08e-14	0.140991
Resident licence	-4.25622	0.11581								63.3433	7.79e-15	0.105356
Resident licence	-4.2973			-0.152749				-0.00863314		66.4674	1.63e-15	0.109939
Resident licence	-4.26092							0.0448066		67.3316	1.06e-15	0.099883
Resident licence	-4.25394	0.123174						0.062469		68.6685	5.43e-16	0.106938
Resident licence	-4.25578	0.116323	-0.000402432							69.8263	3.05e-16	0.105356
Resident licence	-4.31488			-0.154011				-0.0176995	0.0174145	72.8573	6.69e-17	0.110066
Resident licence	-4.26793							0.0412837	0.00707187	73.7998	4.18e-17	0.0999036
Resident licence	-4.28662	0.1292						0.0468118	0.0332507	74.8199	2.51e-17	0.107391
Resident licence	-4.26018	0.11566	0.00614574					0.063461		75.1337	2.14e-17	0.106963
Resident licence	-4.29553	0.119548	0.00799495					0.0478488	0.0339906	81.2735	9.96e-19	0.107431
Non-resident licence, male	-5.52831							1.01023	-0.381452	0	0.868253	0.216165
Non-resident licence, male	-5.53493			-0.0697497				0.989836	-0.389545	5.94389	0.0444576	0.216811
Non-resident licence, male	-5.54025	0.0463431						1.01142	-0.36825	6.1608	0.0398882	0.216551
Non-resident licence, male	-5.52868					0.0147423		1.00853	-0.378788	6.45506	0.0344309	0.216199
Non-resident licence, male	-5.57497	0.125513		-0.154502				0.970161	-0.363964	10.9079	0.0037156	0.218628
Non-resident licence, male	-5.53714			-0.0893828		0.046989		0.978897	-0.384212	12.1848	0.0019622	0.217101
Non-resident licence, male	-5.55189			-0.0943029	0.0190853			1.00028	-0.392313	12.3717	0.0017872	0.216877
Non-resident licence, male	-5.54028	0.0452438				0.0077314		1.01048	-0.367012	12.6365	0.00156551	0.21656
Non-resident licence, male	-5.53785	0.050657	-0.00392389					1.01024	-0.367	12.6403	0.00156255	0.216556
Non-resident licence, male	-5.49559					0.0562243	-0.0389307	0.997095	-0.373113	12.6626	0.00154525	0.216529
Non-resident licence, male	-5.57885	0.131415		-0.183091		0.0603838		0.955859	-0.356334	17.0026	0.000176432	0.219092
Non-resident licence, male	-5.60028	0.127988		-0.191576	0.0277153			0.985172	-0.367425	17.2747	0.000153988	0.218767
Non-resident licence, male	-5.57902	0.119836	0.00553886	-0.155411				0.971571	-0.365244	17.3857	0.000145673	0.218635
Non-resident licence, male	-5.50395			-0.0888068		0.0877267	-0.0385813	0.967688	-0.379007	18.3986	8.78e-05	0.217423
Non-resident licence, male	-5.54272			-0.0965477	0.00642465	0.0444092		0.983022	-0.385432	18.6626	7.69e-05	0.217108
Non-resident licence, male	-5.50443	0.0503743				0.0534383	-0.043632	0.997914	-0.359346	18.7768	7.27e-05	0.216971
Non-resident licence, male	-5.53748	0.0493675	-0.00365842			0.00760353		1.00949	-0.366462	19.1167	6.13e-05	0.216564
Non-resident licence, male	-5.82233							0.779482		22.1987	1.31e-05	0.181024
Non-resident licence, male	-5.5379	0.139947		-0.188544		0.114206	-0.0511048	0.939377	-0.347432	23.0225	8.7e-06	0.219645
Non-resident licence, male	-5.58636	0.120811	0.0105386	-0.185571		0.0620126		0.958291	-0.358881	23.4652	6.97e-06	0.219117
Non-resident licence, male	-5.59004	0.132032		-0.197265	0.0121945	0.0553481		0.963491	-0.358163	23.4659	6.97e-06	0.219116
Non-resident licence, male	-5.60382	0.122823	0.00500107	-0.192219	0.0275822			0.986375	-0.36857	23.7536	6.03e-06	0.218772
Non-resident licence, male	-5.8286	0.168731						0.810269		24.0424	5.22e-06	0.186814
Non-resident licence, male	-5.51863			-0.113484	0.0218698	0.0848723	-0.0443093	0.979889	-0.38197	24.8232	3.53e-06	0.217494
Non-resident licence, male	-5.50028	0.0562822	-0.00524847			0.0535014	-0.0438915	0.996384	-0.35842	25.254	2.85e-06	0.216978
Non-resident licence, male	-5.80994					0.105949		0.77817		27.2264	1.06e-06	0.182845
Non-resident licence, male	-5.861	0.255338		-0.165527				0.76389		28.5379	5.52e-07	0.189281
Non-resident licence, male	-5.81904			0.0184397				0.786974		28.6408	5.24e-07	0.181076
Non-resident licence, male	-5.56073	0.143244		-0.228796	0.0342637	0.1107	-0.0605911	0.958198	-0.351758	29.3645	3.65e-07	0.219813
Non-resident licence, male	-5.54473	0.130619	0.00925486	-0.190706		0.115316	-0.05083	0.941621	-0.349717	29.49	3.43e-07	0.219664
Non-resident licence, male	-5.76766	0.23824	-0.0701379					0.791925		29.5365	3.35e-07	0.188042
Non-resident licence, male	-5.81957	0.155139				0.0707376		0.806302		29.9206	2.76e-07	0.187565
Non-resident licence, male	-5.59611	0.121957	0.00993253	-0.198581	0.0115196	0.0573182		0.965514	-0.360788	29.931	2.75e-07	0.219137
Non-resident licence, male	-5.71862					0.200417	-0.0955954	0.757307		32.0617	9.47e-08	0.184901
Non-resident licence, male	-5.85472	0.259916		-0.225686		0.13424		0.74148		33.1318	5.55e-08	0.19162
Non-resident licence, male	-5.81414			-0.0327667		0.118752		0.765174		33.606	4.38e-08	0.182974
Non-resident licence, male	-5.80282	0.317669	-0.0657182	-0.160791				0.74861		34.1592	3.32e-08	0.190349
Non-resident licence, male	-5.71973	0.162182				0.173128	-0.104273	0.785132		34.4346	2.89e-08	0.190008
Non-resident licence, male	-5.76793			0.0804922	-0.0513305			0.762093		34.6932	2.54e-08	0.181615
Non-resident licence, male	-5.83176	0.252025		-0.128256	-0.0290173			0.749728		34.8855	2.31e-08	0.189449
Non-resident licence, male	-5.76303	0.221786	-0.0659165			0.0643165		0.789375		35.5252	1.68e-08	0.188656
Non-resident licence, male	-5.56563	0.135763	0.00732848	-0.229719	0.0336045	0.111676	-0.0602021	0.959627	-0.353533	35.8379	1.43e-08	0.219825
Non-resident licence, male	-5.75185	0.270047		-0.231592		0.240084	-0.109139	0.716746		37.4811	6.31e-09	0.194253
Non-resident licence, male	-5.72305			-0.0319236		0.212266	-0.0954039	0.744487		38.4473	3.89e-09	0.185023
Non-resident licence, male	-5.72382			0.0604921	-0.089238	0.15204		0.715849		38.9147	3.08e-09	0.18444
Non-resident licence, male	-5.78403	0.25333		-0.149341	-0.0689762	0.160196		0.703084		38.9261	3.06e-09	0.192471
Non-resident licence, male	-5.80601	0.312055	-0.0552836	-0.217493		0.125879		0.730009		39.0024	2.95e-09	0.192377
Non-resident licence, male	-5.66216	0.229189	-0.0664256			0.167545	-0.104764	0.767969		40.0323	1.76e-09	0.191104
Non-resident licence, male	-5.78163	0.313284	-0.0639824	-0.131889	-0.0225362			0.738076		40.5621	1.35e-09	0.190448
Non-resident licence, male	-5.7033	0.321547	-0.0549743	-0.22308		0.23213	-0.109054	0.705507		43.3635	3.33e-10	0.194993
Non-resident licence, male	-5.72992	0.266196		-0.197622	-0.0300911	0.241944	-0.0996785	0.702166		43.8508	2.61e-10	0.194393
Non-resident licence, male	-5.67914			0.0316102	-0.0608298	0.216452	-0.0768964	0.714875		44.4494	1.93e-10	0.185622
Non-resident licence, male	-5.7484	0.299543	-0.0486636	-0.149788	-0.0618329	0.150228		0.697081		44.9461	1.51e-10	0.193042
Non-resident licence, male	-5.68944	0.31665	-0.0528028	-0.199059	-0.0214963	0.233853	-0.102385	0.695564		49.7903	1.34e-11	0.195062
Non-resident licence, male	-5.5683	0.268407		-0.21003	-0.264592	0.316932				71.723	2.31e-16	0.142483
Non-resident licence, male	-5.51181			-0.0116156	-0.278846	0.31702				72.5055	1.56e-16	0.132904
Non-resident licence, male	-5.65709	0.280208		-0.206049	-0.196522					75.4294	3.63e-17	0.129019
Non-resident licence, male	-5.85256	0.294471		-0.486548						76.0804	2.62e-17	0.119466
Non-resident licence, male	-5.51285	0.279005		-0.259822	-0.226613	0.399434	-0.102113			76.5543	2.07e-17	0.144647
Non-resident licence, male	-5.5929			0.00419401	-0.211971					76.5647	2.06e-17	0.118813
Non-resident licence, male	-5.50799	0.338411	-0.0804591	-0.201594	-0.253553	0.299258				76.8946	1.74e-17	0.144201
Non-resident licence, male	-5.83689	0.286755		-0.551233		0.224682				77.1016	1.57e-17	0.126789
Non-resident licence, male	-5.6714	0.302209		-0.558714		0.397972	-0.180723			77.6236	1.21e-17	0.134712
Non-resident licence, male	-5.46475			-0.0457059	-0.249265	0.385283	-0.0829026			77.8852	1.06e-17	0.134366
Non-resident licence, male	-5.80205			-0.289132						78.401	8.21e-18	0.107532
Non-resident licence, male	-5.73821	0.407137	-0.128861	-0.460876						78.9819	6.14e-18	0.124275
Non-resident licence, male	-5.56575	0.379652	-0.114466	-0.198184	-0.185799					79.2416	5.39e-18	0.132568
Non-resident licence, male	-5.79074			-0.360174		0.224246				79.2698	5.31e-18	0.115161
Non-resident licence, male	-5.6368			-0.359657		0.385474	-0.167532			80.6928	2.61e-18	0.121981
Non-resident licence, male	-5.74081	0.3829	-0.109278	-0.522153		0.205125				80.9957	2.24e-18	0.130239
Non-resident licence, male	-5.72675									81.5659	1.69e-18	0.0942686
Non-resident licence, male	-5.44616	0.353262	-0.0845966	-0.252078	-0.214094	0.385056	-0.106322			81.5871	1.67e-18	0.146541
Non-resident licence, male	-5.57877	0.395133	-0.106375	-0.528851		0.377969	-0.178748			81.6896	1.58e-18	0.137904
Non-resident licence, male	-5.71042					0.12288				86.2769	1.6e-19	0.0967195
Non-resident licence, male	-5.72642	0.0536401								87.6089	8.22e-20	0.0948779
Non-resident licence, male	-5.55614					0.282993	-0.166993			87.8479	7.29e-20	0.103478
Non-resident licence, male	-5.59441	0.211313	-0.162755							88.2082	6.09e-20	0.102984
Non-resident licence, male	-5.71061	0.0383763				0.117088				92.5365	6.99e-21	0.0970282
Non-resident licence, male	-5.58541	0.192138	-0.156779			0.101917				93.5361	4.24e-21	0.104567
Non-resident licence, male	-5.55383	0.0491642				0.277594	-0.169153			93.9686	3.42e-21	0.103975
Non-resident licence, male	-5.42428	0.20464	-0.158575			0.266019	-0.170918			94.8906	2.15e-21	0.111562

## Sheet: 2000s-contemp
Table S4. Models to predict the harvest of caribou in Newfoundland, 2000-2009. The "contemporary landscape" includes outfitter camps and roads (the latter of which do not appear in the same models as cutblocks). The regression coefficients are shown for each variable in the model. Variables not in the models appear as blank entries.
Harvest type	Intercept	Proportion of lichen cover	Proportion of lichen cover squared	Distance to roads	Distance to roads squared	Distance to cutblocks	Distance to cutblocks squared	Distance to outfitter camps	Distance to outfitter camps sqaured	Distance to power lines	Distance to power lines squared	Distance to towns	Distance to towns squared	ΔAIC	AIC weight	R²
Total harvest	-4.23677	0.22963		-0.561147	0.162531			0.0667809	-0.128136	-0.240865	0.132588	0.238259	-0.136039	0	0.23773	0.321033
Total harvest	-4.33147	0.203302		-0.553315	0.141827					-0.26621	0.121095	0.242685	-0.121453	0.63841	0.172765	0.306761
Total harvest	-4.41717	0.234578		-0.532856	0.125152					-0.246132	0.118866	0.184876		1.94875	0.0897261	0.298451
Total harvest	-4.10722	0.241521		-0.668778	0.204864			0.121785	-0.143431			0.221065	-0.127709	2.02789	0.0862448	0.305287
Total harvest	-4.35087	0.263724		-0.53023	0.140236			0.0209673	-0.110358	-0.228494	0.129932	0.169369		2.86466	0.0567584	0.311259
Total harvest	-4.21792	0.272346		-0.635052	0.182359			0.078476	-0.12597			0.157121		3.87316	0.0342798	0.296383
Total harvest	-4.30221	0.2502		-0.634638	0.157437							0.16023		3.97233	0.0326214	0.282185
Total harvest	-4.24284	0.204985		-0.619627	0.181275					-0.130038		0.2349	-0.118693	4.263	0.0282088	0.295964
Total harvest	-4.22476	0.22558		-0.659462	0.172829							0.208962	-0.104556	4.55993	0.0243168	0.288627
Total harvest	-4.35823	0.214439		-0.530424	0.138084			-0.106656		-0.282617	0.127265	0.220663	-0.112996	4.57084	0.0241846	0.30946
Total harvest	-4.44231	0.24529		-0.506744	0.122076			-0.12724		-0.268135	0.126861	0.163206		4.75214	0.0220887	0.302387
Total harvest	-4.32809	0.235491		-0.598057	0.163824					-0.113781		0.177393		5.21788	0.0174999	0.287911
Total harvest	-4.14244	0.227651		-0.636556	0.207522			0.0835477	-0.124116	-0.0931627		0.233204	-0.132583	5.37561	0.0161728	0.308609
Total harvest	-4.3154	0.230603		-0.359566						-0.278462	0.158845	0.165687		5.62436	0.0142813	0.287468
Total harvest	-4.2944	0.255423	-0.0441122	-0.559954	0.143073					-0.270124	0.121619	0.238289	-0.119219	5.78138	0.013203	0.30818
Total harvest	-4.21703	0.264778	-0.0294103	-0.564284	0.162696			0.0597063	-0.123816	-0.244726	0.132963	0.234099	-0.133332	5.88865	0.0125135	0.32165
Total harvest	-4.21527	0.259742		-0.628216	0.163421			0.0250723	-0.119355					6.41191	0.00963285	0.28661
Total harvest	-4.34308	0.252387		-0.532606	0.122369			-0.0337591	-0.105553	-0.210571	0.127824			6.61784	0.00869035	0.300394
Total harvest	-4.23444	0.204288		-0.356525						-0.300261	0.165388	0.21073	-0.0995339	6.82348	0.00784121	0.293202
Total harvest	-4.37503	0.290929	-0.0481853	-0.541417	0.127335					-0.25004	0.11921	0.179837		6.84304	0.00776492	0.300153
Total harvest	-4.28806	0.230671		-0.634794	0.139422									7.47706	0.00565537	0.271139
Total harvest	-4.43204	0.233831		-0.510433	0.105741			-0.174385		-0.250793	0.125586			7.79847	0.00481579	0.292147
Total harvest	-4.25388	0.261043		-0.605349	0.184631			0.042124	-0.108249	-0.0838742		0.165485		7.81774	0.00476961	0.299109
Total harvest	-4.34574	0.242659		-0.33722				-0.135195		-0.3005	0.167533	0.141991		7.95589	0.00445127	0.291977
Total harvest	-4.09123	0.268107	-0.0219302	-0.671581	0.204659			0.117302	-0.140675			0.217367	-0.125354	8.18049	0.00397843	0.305638
Total harvest	-4.39359	0.216329		-0.55017	0.108274					-0.21302	0.11275			8.37605	0.00360785	0.284464
Total harvest	-4.32264	0.307988	-0.037758	-0.535652	0.14146			0.0125528	-0.105434	-0.233206	0.130309	0.164516		8.37624	0.0036075	0.312281
Total harvest	-4.26149	0.257299		-0.336894				-0.0157334	-0.0893138	-0.271876	0.176544	0.144572		8.75643	0.00298298	0.298102
Total harvest	-4.34767	0.233019		-0.360728				-0.177967		-0.279589	0.160881			8.81965	0.00289016	0.283978
Total harvest	-4.31275	0.258948		-0.624828	0.156951			-0.0801845				0.146658		8.97266	0.00267728	0.283811
Total harvest	-4.261	0.213627		-0.604971	0.180893			-0.0837876		-0.137878		0.218413	-0.112431	9.17596	0.00241852	0.297652
Total harvest	-4.26309	0.300002	-0.0427667	-0.642153	0.158675							0.155164		9.21345	0.00237361	0.283547
Total harvest	-4.34488	0.244183		-0.581197	0.164551			-0.103136		-0.124657		0.160583		9.29107	0.00228325	0.29053
Total harvest	-4.39824	0.305517	-0.0513049	-0.515357	0.124718			-0.130389		-0.272598	0.127332	0.157515		9.44804	0.0021109	0.304291
Total harvest	-4.16188	0.229707		-0.336365				0.0163236	-0.100625	-0.28856	0.184494	0.195303	-0.105652	9.48176	0.00207561	0.304255
Total harvest	-4.20664	0.255721	-0.0428635	-0.62614	0.182601					-0.133219		0.230236	-0.116212	9.48706	0.00207012	0.297318
Total harvest	-4.32006	0.269844	-0.0466229	-0.537	0.139627			-0.109536		-0.286929	0.127899	0.215356	-0.110238	9.5674	0.00198861	0.311027
Total harvest	-4.19247	0.309388	-0.0312454	-0.640278	0.182974			0.0727408	-0.122571			0.152576		9.69009	0.00187029	0.2971
Total harvest	-4.30509	0.214277		-0.397049						-0.241821	0.146925			9.73249	0.00183106	0.275835
Total harvest	-4.26442	0.248197		-0.360511				-0.0619435	-0.0873078	-0.249874	0.168814			9.88006	0.00170082	0.289891
Total harvest	-4.19211	0.269867	-0.0375229	-0.664932	0.173177							0.204172	-0.1019	10.0826	0.00153704	0.289671
Total harvest	-4.2685	0.217405		-0.337481				-0.119409		-0.317112	0.17224	0.185761	-0.0904379	10.1126	0.00151414	0.296645
Total harvest	-4.28617	0.291109	-0.0475704	-0.606474	0.166066					-0.117257		0.172207		10.1611	0.00147782	0.289586
Total harvest	-4.23654	0.233458		-0.650863	0.171619			-0.0611059				0.196471	-0.0994695	10.1979	0.00145089	0.289546
Total harvest	-4.30565	0.24637		-0.619127	0.14045			-0.122469						10.4042	0.00130867	0.275091
Total harvest	-4.30786	0.218196		-0.608225	0.143331					-0.0898246				10.6386	0.00116397	0.274831
Total harvest	-4.27601	0.280503	-0.042776	-0.364092						-0.281292	0.159783	0.160722		10.8507	0.00104684	0.288836
Total harvest	-4.16812	0.243392		-0.642002	0.169272			0.0331204	-0.125742				-0.0543134	11.0152	0.000964198	0.288657
Total harvest	-4.2942	0.235003		-0.546818	0.128247			-0.0250289	-0.112414	-0.212338	0.128751		-0.0571763	11.0312	0.000956527	0.302604
Total harvest	-4.24548	0.250051		-0.604548	0.164778			-0.00838906	-0.104275	-0.0690682				11.1709	0.000891977	0.288488
Total harvest	-4.12366	0.261012	-0.0278398	-0.639457	0.207627			0.0764494	-0.119866	-0.0965064		0.229033	-0.129874	11.3297	0.000823898	0.309168
Total harvest	-4.30635	0.309131	-0.0487067	-0.538931	0.124655			-0.0413631	-0.0997891	-0.216961	0.128228			11.4529	0.000774686	0.302155
Total harvest	-4.17999	0.310466	-0.0429584	-0.635083	0.165048			0.0204368	-0.115299					11.6101	0.000716121	0.28801
Total harvest	-4.38027	0.304411	-0.0604157	-0.519654	0.109516			-0.175219		-0.256427	0.125982			11.7615	0.000663911	0.29487
Total harvest	-4.23987	0.292984	-0.053371	-0.643323	0.141648									11.9837	0.000594108	0.273338
Total harvest	-4.33424	0.232941		-0.582027	0.146381			-0.147658		-0.109724				12.0805	0.000566029	0.280399
Total harvest	-4.29031			-0.490968	0.14263					-0.302383	0.123363	0.239867	-0.16703	12.1404	0.000549324	0.287432
Total harvest	-4.19892	0.251465	-0.040111	-0.36061						-0.302902	0.16625	0.206329	-0.0979617	12.1942	0.000534734	0.294403
Total harvest	-4.34278	0.284811	-0.0587265	-0.558824	0.111331					-0.21874	0.113185			12.4483	0.000470956	0.287097
Total harvest	-4.25832	0.218516		-0.644386	0.142734								-0.0382566	12.9962	0.000358088	0.272212
Total harvest	-4.30446	0.295545	-0.0452115	-0.341387				-0.137229		-0.303659	0.168684	0.136516		13.0436	0.000349703	0.293486
Total harvest	-4.39966	0.219841		-0.520291	0.109278			-0.173952		-0.25394	0.125778		-0.0423872	13.1167	0.000337158	0.293407
Total harvest	-4.29814	0.295958	-0.0539429	-0.364043				-0.177835		-0.284175	0.162372			13.2837	0.000310148	0.286186
Total harvest	-4.22631	0.304046	-0.0366325	-0.610492	0.185754			0.0334205	-0.103258	-0.0881938		0.160609		13.393	0.000293657	0.300081
Total harvest	-4.36085	0.201986		-0.559986	0.111939					-0.21637	0.113133		-0.0432143	13.6387	0.000259707	0.285798
Total harvest	-4.30125	0.303315	-0.0503484	-0.58955	0.167215			-0.106602		-0.128667		0.154731		14.0623	0.000210129	0.292385
Total harvest	-4.27229	0.31116	-0.0446409	-0.632283	0.158342			-0.0827918				0.1411		14.1122	0.00020496	0.285281
Total harvest	-4.25629	0.276468	-0.0533333	-0.400543						-0.246676	0.148318			14.2206	0.000194146	0.278041
Total harvest	-4.22388	0.267296	-0.0450566	-0.611297	0.182473			-0.0869143		-0.141441		0.212864	-0.109451	14.2777	0.000188682	0.299134
Total harvest	-4.23489	0.296512	-0.0337146	-0.340062				-0.0227814	-0.084863	-0.275313	0.177062	0.140071		14.4649	0.000171821	0.298933
Total harvest	-4.31996	0.222039		-0.364141				-0.177854		-0.283117	0.161894		-0.033281	14.5894	0.000161452	0.284759
Total harvest	-4.25727	0.285952	-0.0581355	-0.616935	0.14661					-0.0950209				14.7745	0.000147175	0.277429
Total harvest	-4.25689	0.309538	-0.0541164	-0.627775	0.142913			-0.122774						14.8781	0.00013975	0.277315
Total harvest	-4.2295	0.298699	-0.0435851	-0.363182				-0.068354	-0.0819227	-0.255059	0.169696			15.0441	0.000128617	0.291322
Total harvest	-4.22365	0.234618		-0.364681				-0.0562917	-0.0919005	-0.253112	0.170981		-0.0441832	15.1317	0.000123106	0.291227
Total harvest	-4.23188	0.267088	-0.0420493	-0.341294				-0.12118		-0.319911	0.173247	0.180648	-0.0884158	15.381	0.000108678	0.29795
Total harvest	-4.14155	0.263149	-0.0283162	-0.339015				0.0101798	-0.0965965	-0.291263	0.18476	0.191297	-0.103578	15.4144	0.000106878	0.30484
Total harvest	-4.27703	0.202982		-0.400267						-0.245498	0.148056		-0.0338045	15.474	0.000103739	0.276656
Total harvest	-4.20317	0.279813	-0.0390184	-0.656164	0.172022			-0.0635883				0.190991	-0.0964207	15.6496	9.5e-05	0.290665
Total harvest	-4.19814	0.233294		-0.618216	0.170516			-0.000767991	-0.11039	-0.0699899			-0.0549631	15.7268	9.14e-05	0.290581
Total harvest	-4.19711			-0.499297	0.161659			0.0877869	-0.108688	-0.279686	0.131112	0.243363	-0.187009	15.9195	8.3e-05	0.297372
Total harvest	-4.20004			-0.554245	0.181786					-0.166738		0.232823	-0.164234	15.9523	8.17e-05	0.276127
Total harvest	-4.27541	0.204271		-0.617826	0.14686					-0.0925787			-0.0422264	15.9525	8.17e-05	0.276126
Total harvest	-4.12563	0.224267		-0.431588										15.9581	8.14e-05	0.254269
Total harvest	-4.11981	0.238844		-0.410057								0.126201		15.9876	8.02e-05	0.261592
Total harvest	-4.27673	0.234595		-0.628451	0.143524			-0.121515					-0.0369201	15.9946	8e-05	0.27608
Total harvest	-4.2612	0.289524	-0.0462898	-0.551797	0.129901			-0.0323463	-0.106603	-0.218502	0.129145		-0.0547999	16.0191	7.9e-05	0.304197
Total harvest	-4.20928	0.305846	-0.0478443	-0.610649	0.167002			-0.0165528	-0.0983373	-0.0751447				16.0745	7.68e-05	0.290204
Total harvest	-4.28268	0.302841	-0.0598349	-0.591043	0.150242			-0.148882		-0.115086				16.1057	7.56e-05	0.283099
Total harvest	-4.13668	0.291719	-0.0404382	-0.647555	0.170351			0.0287442	-0.121654				-0.0520549	16.3553	6.68e-05	0.289899
Total harvest	-4.35011	0.289545	-0.0592767	-0.528484	0.11256			-0.174574		-0.259507	0.126221		-0.0405828	17.1647	4.45e-05	0.296033
Total harvest	-4.30206	0.219238		-0.591562	0.149758			-0.147381		-0.112487			-0.0417241	17.4296	3.9e-05	0.281646
Total harvest	-4.21239	0.27996	-0.0522232	-0.651914	0.144542								-0.0364713	17.5815	3.62e-05	0.274321
Total harvest	-4.30597			-0.47505	0.140777			-0.0643766		-0.314438	0.12704	0.226276	-0.163337	17.67	3.46e-05	0.28847
Total harvest	-4.31189	0.269759	-0.0577979	-0.567801	0.114584					-0.222134	0.113604		-0.0417569	17.7776	3.28e-05	0.288353
Total harvest	-4.19154			-0.295783						-0.332491	0.167236	0.207758	-0.145848	18.4019	2.4e-05	0.27341
Total harvest	-4.13492	0.227812		-0.372887						-0.0923788		0.139231		18.9361	1.84e-05	0.265572
Total harvest	-4.27192	0.284526	-0.0533328	-0.367261				-0.177536		-0.287572	0.163312		-0.0321877	19.0929	1.7e-05	0.286921
Total harvest	-4.14089	0.239136		-0.414699				-0.115534						19.2847	1.54e-05	0.25786
Total harvest	-4.05358	0.220714		-0.411526								0.157554	-0.07249	19.5979	1.32e-05	0.264828
Total harvest	-4.22926	0.264861	-0.0529232	-0.403586						-0.2503	0.149405		-0.0330844	19.9858	1.09e-05	0.278833
Total harvest	-4.05668	0.247624		-0.397509				-0.0080342	-0.0855558					20.0753	1.04e-05	0.264292
Total harvest	-4.13838	0.214612		-0.404417						-0.0745353				20.106	1.02e-05	0.256927
Total harvest	-4.22691	0.271234	-0.0570928	-0.625681	0.149756					-0.0977973			-0.0405955	20.1638	9.94e-06	0.278637
Total harvest	-4.19132	0.283895	-0.04219	-0.367077				-0.0624427	-0.0865082	-0.258027	0.171714		-0.0425881	20.3743	8.95e-06	0.29257
Total harvest	-4.23055	0.296807	-0.0528403	-0.636052	0.145548			-0.121648					-0.0348646	20.5573	8.17e-06	0.278202
Total harvest	-4.1657	0.286836	-0.0453928	-0.623003	0.172124			-0.00855707	-0.104447	-0.0758164			-0.052554	20.7822	7.3e-06	0.292128
Total harvest	-4.10322			-0.569911	0.204303			0.104034	-0.105256	-0.135193		0.2387	-0.18279	20.8272	7.14e-06	0.285027
Total harvest	-4.08031	0.279224	-0.0471015	-0.435204										20.9032	6.87e-06	0.256021
Total harvest	-4.13089	0.247613		-0.40069				-0.0799744				0.111819		21.0177	6.49e-06	0.263231
Total harvest	-4.40648			-0.445028	0.119633					-0.281182	0.120271	0.156829		21.0492	6.39e-06	0.270463
Total harvest	-4.16997			-0.598706	0.168364							0.195762	-0.151504	21.0832	6.28e-06	0.263157
Total harvest	-4.04554			-0.613467	0.198843			0.168392	-0.132623			0.22017	-0.180414	21.1647	6.03e-06	0.277532
Total harvest	-4.08352	0.282799	-0.0378617	-0.414138								0.12137		21.4968	5.11e-06	0.262691
Total harvest	-4.0443	0.255592		-0.382926				0.0316526	-0.0876794			0.11505		21.5426	4.99e-06	0.269913
Total harvest	-4.2529	0.288184	-0.0585879	-0.599547	0.153138			-0.148355		-0.117707			-0.0397617	21.5477	4.98e-06	0.284239
Total harvest	-4.06061	0.205495		-0.370048						-0.103333		0.176743	-0.0832958	21.706	4.6e-06	0.26973
Total harvest	-4.20891			-0.54511	0.181754			-0.0427306		-0.172168		0.224287	-0.161988	22.0173	3.94e-06	0.276589
Total harvest	-4.10386	0.216375		-0.434432									-0.024683	22.0444	3.88e-06	0.254722
Total harvest	-4.1587	0.228813		-0.377255				-0.134129		-0.0902655				22.4212	3.22e-06	0.261648
Total harvest	-4.1497	0.236515		-0.357087				-0.0962535		-0.100849		0.122281		23.3461	2.03e-06	0.267896
Total harvest	-4.21195			-0.280925				-0.0744509		-0.345528	0.171624	0.191711	-0.141813	23.6145	1.77e-06	0.27482
Total harvest	-4.38731			-0.469086	0.105568					-0.249382	0.115476			23.6282	1.76e-06	0.260284
Total harvest	-4.30878			-0.28465						-0.306017	0.157616	0.138565		23.7914	1.62e-06	0.260099
Total harvest	-4.0954	0.293965	-0.0470766	-0.418175				-0.115034						24.246	1.29e-06	0.259585
Total harvest	-4.3163			-0.506079	0.157277					-0.150871		0.149823		24.3153	1.25e-06	0.259506
Total harvest	-4.09727	0.273998	-0.0395592	-0.37679						-0.0936467		0.134194		24.3529	1.22e-06	0.266768
Total harvest	-4.30092			-0.323194						-0.27313	0.14835			24.5332	1.12e-06	0.25188
Total harvest	-3.95983	0.234328		-0.384354				0.056374	-0.0957739			0.153011	-0.0814645	24.5397	1.12e-06	0.273794
Total harvest	-4.32039			-0.502445	0.113124					-0.251328	0.116251		-0.0895106	24.5928	1.09e-06	0.2665
Total harvest	-4.09131	0.272346	-0.0494389	-0.407276						-0.0771718				24.8903	9.36e-07	0.258855
Total harvest	-4.0679	0.229468		-0.403646				-0.0671672				0.1433	-0.0670865	25.0763	8.53e-07	0.265957
Total harvest	-4.11991			-0.278817				0.0408524	-0.0823605	-0.322242	0.181194	0.20131	-0.157477	25.1838	8.08e-07	0.280249
Total harvest	-4.02136	0.262046	-0.0352451	-0.415204								0.152931	-0.0707786	25.2332	7.88e-07	0.265781
Total harvest	-4.08215	0.239766		-0.375756				-0.037061	-0.0717729	-0.0594126				25.2618	7.77e-07	0.265749
Total harvest	-4.12012	0.23161		-0.41752				-0.115026					-0.0235189	25.4104	7.22e-07	0.258265
Total harvest	-4.0242	0.291569	-0.0375564	-0.400901				-0.012125	-0.0815578					25.5858	6.61e-07	0.265385
Total harvest	-4.42474			-0.424159	0.117983			-0.0866287		-0.299244	0.12578	0.140961		25.7923	5.96e-07	0.272401
Total harvest	-4.02373	0.237203		-0.400607				-0.00384266	-0.0886755				-0.0338392	25.8323	5.84e-07	0.265108
Total harvest	-4.11391	0.205295		-0.406949						-0.0764646			-0.0281318	26.0769	5.17e-07	0.257509
Total harvest	-4.29996			-0.524339	0.140594					-0.126454				26.1042	5.1e-07	0.250081
Total harvest	-4.4172			-0.434248	0.104537			-0.127789		-0.281966	0.124949			26.2061	4.85e-07	0.264688
Total harvest	-4.07347	0.246708		-0.355829				0.000528079	-0.0715959	-0.0705118		0.121983		26.207	4.85e-07	0.27194
Total harvest	-4.09344	0.293306	-0.0392426	-0.404529				-0.0816879				0.106627		26.4604	4.27e-07	0.264402
Total harvest	-4.26995			-0.55589	0.132516									26.5078	4.17e-07	0.242143
Total harvest	-4.2347			-0.34258						-0.277688	0.15109		-0.080795	26.55	4.08e-07	0.256972
Total harvest	-4.07892	0.214687		-0.356935				-0.0825978		-0.109642		0.159558	-0.0770848	26.6857	3.81e-07	0.271407
Total harvest	-4.34876			-0.467605	0.111929			-0.132333		-0.284572	0.125867		-0.0920249	26.9193	3.39e-07	0.271147
Total harvest	-4.33307			-0.289931				-0.129822		-0.305679	0.158762			26.9774	3.3e-07	0.256486
Total harvest	-4.05955	0.271106	-0.0467526	-0.437886									-0.0239605	27.0088	3.24e-07	0.25645
Total harvest	-4.2329			-0.557705	0.148045					-0.126865			-0.0883288	27.2085	2.94e-07	0.256223
Total harvest	-4.11127	0.286718	-0.0495746	-0.379999				-0.133725		-0.0926197				27.2118	2.93e-07	0.263556
Total harvest	-4.0269	0.249092	-0.0369684	-0.373663						-0.104573		0.172051	-0.0816994	27.2525	2.87e-07	0.270775
Total harvest	-4.27906			-0.548061	0.145087							0.121118		27.3688	2.71e-07	0.248629
Total harvest	-4.02022	0.289097	-0.0286003	-0.386292				0.0265099	-0.0843757			0.110859		27.4724	2.57e-07	0.27053
Total harvest	-4.25865			-0.487984	0.127326			-0.00756901	-0.0910645	-0.250828	0.127708		-0.107166	27.5559	2.47e-07	0.277633
Total harvest	-4.17036			-0.598185	0.16824			-0.00268846				0.195164	-0.151354	27.5647	2.46e-07	0.263159
Total harvest	-4.20372			-0.589417	0.140755								-0.0879015	27.6799	2.32e-07	0.248272
Total harvest	-4.35612			-0.437875	0.13056			0.0242699	-0.0787106	-0.27078	0.126819	0.145713		27.8064	2.18e-07	0.277356
Total harvest	-4.3305			-0.265519				-0.0927831		-0.32446	0.163734	0.120989		28.2904	1.71e-07	0.262341
Total harvest	-4.13472	0.219739		-0.379906				-0.133919		-0.0921819			-0.0275945	28.4148	1.61e-07	0.2622
Total harvest	-4.3513			-0.447352	0.116061			-0.0233009	-0.0747308	-0.253384	0.125466			28.654	1.43e-07	0.269211
Total harvest	-4.11066	0.284764	-0.0412051	-0.360651				-0.0980472		-0.102234		0.116825		28.6786	1.41e-07	0.269183
Total harvest	-4.26535			-0.309498				-0.134422		-0.310925	0.161775		-0.0836491	28.7254	1.38e-07	0.26185
Total harvest	-3.98748	0.223479		-0.355146				0.0238512	-0.0784269	-0.077144		0.162905	-0.0857965	28.8515	1.29e-07	0.276201
Total harvest	-4.32739			-0.493119	0.157935			-0.0634721		-0.159947		0.138686		29.8712	7.76e-08	0.260555
Total harvest	-4.10949			-0.590306	0.164151			0.078229	-0.113808				-0.107068	29.9713	7.38e-08	0.260442
Total harvest	-4.31944			-0.501047	0.143155			-0.102378		-0.144332				30.1002	6.92e-08	0.252927
Total harvest	-4.07587	0.286173	-0.0466463	-0.420825				-0.114423					-0.0225876	30.3964	5.96e-08	0.259961
Total harvest	-4.04869	0.286968	-0.0406991	-0.378113				-0.0433856	-0.0664734	-0.0632527				30.6089	5.36e-08	0.267023
Total harvest	-3.9414	0.26308	-0.0241416	-0.387157				0.05175	-0.0927816			0.149127	-0.0796491	30.6264	5.32e-08	0.274234
Total harvest	-4.035	0.272403	-0.036436	-0.407105				-0.0688659				0.138151	-0.0650758	30.6584	5.23e-08	0.266968
Total harvest	-4.06768	0.262814	-0.0491377	-0.409768						-0.0791324			-0.027577	30.8771	4.69e-08	0.259417
Total harvest	-4.27469			-0.288355				-0.047556	-0.0588776	-0.285032	0.163072			30.8856	4.67e-08	0.259408
Total harvest	-4.48457	0.262126				-0.417171	0.195794	-0.171828		-0.376104	0.117554	0.242303		30.9573	4.51e-08	0.273867
Total harvest	-4.04876	0.228934		-0.378814				-0.0332024	-0.0747257	-0.0603843			-0.0347812	30.9787	4.46e-08	0.266609
Total harvest	-4.25129			-0.534358	0.150638			-0.106881		-0.145251			-0.0904124	30.9982	4.41e-08	0.25928
Total harvest	-4.20017			-0.550471	0.151257			0.0673715	-0.0993144					31.0905	4.22e-08	0.251795
Total harvest	-3.9932	0.280372	-0.0366041	-0.403828				-0.00779515	-0.084701				-0.0326746	31.3886	3.63e-08	0.266149
Total harvest	-4.18635			-0.309224				-0.0361852	-0.0717012	-0.287109	0.168296		-0.0946871	31.4633	3.5e-08	0.266065
Total harvest	-4.45016	0.263239				-0.468963	0.203843			-0.344525	0.102506	0.274562		31.5433	3.36e-08	0.265975
Total harvest	-4.16264			-0.55466	0.167354			0.0164809	-0.089853	-0.111164			-0.104081	31.8329	2.91e-08	0.26565
Total harvest	-4.19964			-0.549553	0.165137			0.112432	-0.104805			0.126303		31.8856	2.83e-08	0.258274
Total harvest	-4.25892			-0.507206	0.171705			0.0468196	-0.0783401	-0.131275		0.142535		31.975	2.71e-08	0.26549
Total harvest	-4.04789	0.283668	-0.03176	-0.358693				-0.00636863	-0.0672668	-0.073099		0.117555		32.0109	2.66e-08	0.272696
Total harvest	-4.27061			-0.263714				-0.00729251	-0.0607883	-0.304223	0.168702	0.123189		32.0302	2.64e-08	0.265428
Total harvest	-4.38168	0.283577				-0.557047	0.240892			-0.229094		0.268689		32.1022	2.54e-08	0.258029
Total harvest	-4.27832			-0.545599	0.132765			-0.058613						32.1321	2.5e-08	0.243137
Total harvest	-4.04438	0.260077	-0.0383199	-0.360203				-0.0842627		-0.110836		0.1543	-0.0751574	32.1676	2.46e-08	0.272521
Total harvest	-4.37548	0.222153				-0.457983	0.21844			-0.374729	0.109665	0.337239	-0.106905	32.3939	2.2e-08	0.27227
Total harvest	-4.39335	0.283421				-0.415663	0.185609	-0.0589221	-0.0849845	-0.343425	0.124031	0.233707		32.444	2.14e-08	0.279393
Total harvest	-4.25334			-0.514336	0.155824			0.00285563	-0.0751176	-0.115956				32.5505	2.03e-08	0.25752
Total harvest	-4.41396	0.224787				-0.409443	0.209448	-0.159066		-0.400401	0.122579	0.302252	-0.0963665	32.907	1.7e-08	0.278883
Total harvest	-4.30163	0.24408				-0.407752	0.200727	-0.030269	-0.0960398	-0.366918	0.131099	0.300791	-0.110751	33.068	1.57e-08	0.28582
Total harvest	-4.21161			-0.578891	0.141013			-0.063021					-0.0891703	33.1818	1.48e-08	0.249399
Total harvest	-4.08843	0.277345	-0.0491525	-0.382506				-0.133378		-0.0945104			-0.026774	33.2297	1.45e-08	0.26408
Total harvest	-4.01716			-0.306788						-0.136863		0.175532	-0.12978	33.2781	1.41e-08	0.249288
Total harvest	-4.11698			-0.366195										33.3516	1.36e-08	0.226541
Total harvest	-4.40353	0.284357				-0.525088	0.240381	-0.142703		-0.241083		0.242404		33.6243	1.19e-08	0.263636
Total harvest	-4.28206			-0.544342	0.144773			-0.0231695				0.116608		33.7241	1.13e-08	0.248776
Total harvest	-4.30948	0.247483				-0.553206	0.256455			-0.248117		0.325528	-0.0970831	33.8938	1.04e-08	0.263332
Total harvest	-4.13483			-0.328791						-0.10772				34.742	6.79e-09	0.23254
Total harvest	-4.00457			-0.359483								0.147482	-0.119843	34.7819	6.66e-09	0.240064
Total harvest	-3.96732	0.255944	-0.027465	-0.357608				0.0176498	-0.0744684	-0.0793419		0.158785	-0.0839039	34.8235	6.52e-09	0.276766
Total harvest	-4.31965	0.303135				-0.52859	0.2354	-0.0406142	-0.0757514	-0.20589		0.234163		36.0877	3.47e-09	0.268148
Total harvest	-4.05266			-0.383512									-0.0741785	36.088	3.46e-09	0.230959
Total harvest	-4.13209			-0.296867						-0.125173		0.114337		36.2126	3.26e-09	0.2384
Total harvest	-4.33592	0.251193				-0.522886	0.254359	-0.130351		-0.257051		0.296916	-0.0878656	36.3048	3.11e-09	0.267905
Total harvest	-4.01723	0.275374	-0.0397834	-0.380975				-0.0393174	-0.0694397	-0.0641508			-0.0335705	36.3729	3e-09	0.267829
Total harvest	-4.11253			-0.346259								0.0924645		36.4393	2.91e-09	0.230546
Total harvest	-4.45739	0.299567	-0.032496			-0.417647	0.198557	-0.175326		-0.380514	0.118702	0.240168		36.6832	2.57e-09	0.274707
Total harvest	-4.07017			-0.346556						-0.108471			-0.0749607	37.4014	1.8e-09	0.237014
Total harvest	-4.42862	0.292585	-0.0254412			-0.470464	0.206319			-0.347841	0.10321	0.273519		37.5562	1.66e-09	0.266503
Total harvest	-4.23396	0.268526				-0.527703	0.251422	-0.0149831	-0.0848284	-0.219163		0.294297	-0.0994104	37.7832	1.48e-09	0.273486
Total harvest	-4.36184	0.310102	-0.0228454			-0.558968	0.243378			-0.231114		0.267702		38.2071	1.2e-09	0.258458
Total harvest	-4.3557	0.249857	-0.0238913			-0.458891	0.220505			-0.377927	0.110438	0.336503	-0.106253	38.4575	1.06e-09	0.272736
Total harvest	-4.3795	0.306353	-0.0202552			-0.415933	0.18745	-0.0650012	-0.0818266	-0.347097	0.124558	0.232348		38.636	9.69e-10	0.279713
Total harvest	-4.38987	0.259618	-0.029896			-0.409509	0.211659	-0.162133		-0.4045	0.123712	0.300197	-0.0950895	38.7416	9.19e-10	0.279597
Total harvest	-4.12441			-0.356153				-0.0542333						39.1048	7.67e-10	0.227403
Total harvest	-4.29212	0.261674	-0.0152524			-0.407694	0.201829	-0.0349652	-0.0934918	-0.369579	0.13149	0.299514	-0.109616	39.384	6.67e-10	0.286002
Total harvest	-4.14884			-0.30625				-0.0876998		-0.121373				39.3939	6.63e-10	0.234686
Total harvest	-4.02523			-0.299003				-0.0382431		-0.141025		0.167343	-0.127719	39.4322	6.51e-10	0.249666
Total harvest	-4.37892	0.317526	-0.0285925			-0.526469	0.243313	-0.145734		-0.243568		0.240521		39.5208	6.23e-10	0.264296
Total harvest	-4.29199	0.271753	-0.0207043			-0.554639	0.258496			-0.249853		0.324674	-0.0963066	40.062	4.75e-10	0.263687
Total harvest	-4.32621	0.163699						-0.230637		-0.461025	0.186468	0.194507		40.9448	3.06e-10	0.247929
Total harvest	-4.00637			-0.358118				-0.00925753				0.145386	-0.119362	41.2455	2.63e-10	0.240087
Total harvest	-4.23808	0.18154						-0.109646	-0.0915978	-0.429225	0.19334	0.196321		41.492	2.32e-10	0.254724
Total harvest	-4.3138					-0.290065	0.196928			-0.438857	0.135329	0.367579	-0.162809	41.5094	2.3e-10	0.254704
Total harvest	-4.0536			-0.340914				0.0364173	-0.0704691					41.6069	2.19e-10	0.232092
Total harvest	-3.90364			-0.339572				0.106099	-0.0880804			0.156209	-0.134337	41.6367	2.16e-10	0.247133
Total harvest	-4.05956			-0.373112				-0.0580639					-0.0753829	41.744	2.05e-10	0.231931
Total harvest	-4.08322			-0.323801				-0.0916058		-0.122448			-0.0767363	41.9029	1.89e-10	0.239323
Total harvest	-4.14106			-0.285428				-0.0551137		-0.13195		0.103856		42.0041	1.8e-10	0.239205
Total harvest	-4.43174	0.261615				-0.395137	0.133255	-0.234645		-0.351399	0.117951			42.2347	1.6e-10	0.253877
Total harvest	-4.31474	0.281393	-0.0256545			-0.523824	0.256684	-0.133016		-0.259077		0.294982	-0.0865291	42.3103	1.54e-10	0.268439
Total harvest	-4.30757	0.322809	-0.017289			-0.529263	0.237178	-0.0459239	-0.0729867	-0.208407		0.233054		42.359	1.51e-10	0.268385
Total harvest	-4.22163	0.248445				-0.142076		-0.0583256	-0.102129	-0.373782	0.17572	0.159203		42.3765	1.49e-10	0.261076
Total harvest	-4.33212	0.286357				-0.397506	0.125652	-0.105726	-0.0954556	-0.314314	0.12474			42.4252	1.46e-10	0.261021
Total harvest	-4.34799					-0.242598	0.187689	-0.151395		-0.462501	0.147195	0.334822	-0.154398	42.5371	1.38e-10	0.260895
Total harvest	-4.13614	0.157267						-0.0751697	-0.10422	-0.44362	0.199982	0.247754	-0.103921	42.5479	1.37e-10	0.260883
Total harvest	-4.11624			-0.342607				-0.0253539				0.0872868		42.7722	1.23e-10	0.230723
Total harvest	-3.94954			-0.296601				0.049598	-0.0622985	-0.115439		0.171225	-0.136739	43.1031	1.04e-10	0.252886
Total harvest	-4.31921	0.221937				-0.123777		-0.19681		-0.413924	0.168962	0.161966		43.1035	1.04e-10	0.252885
Total harvest	-3.97071			-0.357488				0.0427445	-0.0796096				-0.0859163	43.2002	9.89e-11	0.237812
Total harvest	-4.25086	0.141565						-0.214873		-0.476066	0.190108	0.237564	-0.0859312	43.6116	8.05e-11	0.252304
Total harvest	-4.22624	0.282716	-0.0122069			-0.527973	0.252435	-0.0188813	-0.0827328	-0.220844		0.293233	-0.0984184	44.1594	6.12e-11	0.273605
Total harvest	-4.09718			-0.304192				-0.0202827	-0.0475944	-0.101242				44.2094	5.97e-11	0.236635
Total harvest	-4.21791	0.260302				-0.196647		-0.0957871	-0.104734	-0.343022	0.163445			44.4444	5.31e-11	0.251352
Total harvest	-4.34941	0.282535				-0.501156	0.176545	-0.202855		-0.216971				44.9694	4.08e-11	0.243286
Total harvest	-4.0427			-0.326544				0.06965	-0.072696			0.0911558		45.0327	3.96e-11	0.235674
Total harvest	-4.25752					-0.229944	0.178483	-0.0532188	-0.0711221	-0.439771	0.154313	0.336181	-0.169017	45.3994	3.29e-11	0.264976
Total harvest	-4.14133	0.216142				-0.116688		-0.0378442	-0.110806	-0.39491	0.184255	0.20773	-0.0846329	45.4259	3.25e-11	0.264946
Total harvest	-4.27052	0.22171				-0.168989				-0.375941	0.152957	0.1929		45.478	3.17e-11	0.242698
Total harvest	-4.3185	0.232546				-0.178648		-0.237957		-0.38455	0.156783			45.5234	3.1e-11	0.242645
Total harvest	-4.01528			-0.322342				-0.012088	-0.0569928	-0.098289			-0.0839484	46.0253	2.41e-11	0.242063
Total harvest	-4.19055	0.343917				-0.554981	0.211265	0.0599666	-0.132665			0.198015		46.0708	2.35e-11	0.249488
Total harvest	-4.25617	0.304577				-0.508254	0.174213	-0.0839945	-0.0868225	-0.177031				46.1867	2.22e-11	0.249355
Total harvest	-4.21407							-0.173733		-0.477882	0.185993	0.237804	-0.120244	46.3663	2.03e-11	0.241668
Total harvest	-4.29692	0.200966	-0.0315787					-0.233336		-0.463975	0.187154	0.190212		46.7188	1.7e-11	0.248744
Total harvest	-4.08918			-0.28351				0.0125895	-0.0477768	-0.111927		0.104035		46.8083	1.63e-11	0.241155
Total harvest	-4.22009					-0.383161	0.239281			-0.287279		0.355575	-0.158132	47.273	1.29e-11	0.240616
Total harvest	-4.11222							-0.0498095	-0.0882253	-0.450293	0.194044	0.247858	-0.139149	47.2746	1.29e-11	0.248105
Total harvest	-4.26076	0.193749				-0.101771		-0.189286		-0.433732	0.174798	0.201866	-0.0679527	47.3256	1.26e-11	0.255463
Total harvest	-4.27177	0.133756								-0.438425	0.176531	0.246121		47.4528	1.18e-11	0.23284
Total harvest	-4.16364									-0.462891	0.179751	0.286071	-0.129981	47.4552	1.18e-11	0.232837
Total harvest	-4.3986	0.305853	-0.0394558			-0.394063	0.136632	-0.238084		-0.357357	0.119322			47.5999	1.1e-11	0.255151
Total harvest	-4.22201	0.205028	-0.0200766					-0.114594	-0.0889282	-0.431768	0.193654	0.193331		47.6893	1.05e-11	0.255049
Total harvest	-4.31744							-0.187191		-0.455043	0.179339	0.174213		47.7692	1.01e-11	0.232469
Total harvest	-4.18433	0.109259								-0.459661	0.182239	0.293917	-0.105206	48.1885	8.17e-12	0.239552
Total harvest	-4.31275	0.316622	-0.0273032			-0.396607	0.128015	-0.112609	-0.0916646	-0.319494	0.125491			48.3746	7.44e-12	0.261624
Total harvest	-4.30574	0.28295				-0.542032	0.166122			-0.191275				48.5669	6.76e-12	0.231532
Total harvest	-4.32821	0.145664						-0.303184		-0.445162	0.180408			48.6128	6.61e-12	0.231478
Total harvest	-4.45294					-0.203707	0.156689	-0.169257		-0.436068	0.144773	0.24017		48.7036	6.31e-12	0.24646
Total harvest	-4.43503	0.263161				-0.39562	0.133358	-0.234443		-0.350738	0.117779		0.00380214	48.7085	6.3e-12	0.253887
Total harvest	-4.21145	0.262706	-0.0128237			-0.140542		-0.0619576	-0.100431	-0.376208	0.176166	0.157828		48.7442	6.19e-12	0.261207
Total harvest	-4.3217	0.282648				-0.396488	0.125416	-0.104285	-0.0969154	-0.315564	0.125404		-0.0105231	48.8383	5.9e-12	0.261101
Total harvest	-4.12519	0.175131	-0.0150533					-0.0790006	-0.10206	-0.445428	0.200134	0.24537	-0.102794	48.869	5.81e-12	0.261066
Total harvest	-4.20578	0.189434				-0.142824				-0.400847	0.160668	0.236409	-0.0783743	48.9345	5.62e-12	0.246194
Total harvest	-4.36854	0.265277				-0.462793	0.131945			-0.295303	0.0949442			49.0044	5.43e-12	0.238603
Total harvest	-4.30456	0.323313				-0.581479	0.215417					0.220506		49.0136	5.41e-12	0.231007
Total harvest	-4.29575	0.250519	-0.0256116			-0.120725		-0.200061		-0.41799	0.170073	0.159516		49.1283	5.11e-12	0.253408
Total harvest	-4.41998					-0.25213	0.165496			-0.406986	0.130799	0.273182		49.1532	5.04e-12	0.23843
Total harvest	-4.24	0.164945						-0.18495	-0.0900692	-0.411339	0.185768			49.3701	4.52e-12	0.238177
Total harvest	-4.22526	0.175968	-0.0288922					-0.217259		-0.478662	0.190693	0.233598	-0.084572	49.4976	4.24e-12	0.252987
Total harvest	-4.11888	0.319635				-0.556496	0.223376	0.0844972	-0.143046			0.242028	-0.0763977	49.6714	3.89e-12	0.252788
Total harvest	-4.27118									-0.435387	0.17138	0.221763		50.1744	3.03e-12	0.221966
Total harvest	-4.24181					-0.353307	0.236618	-0.118494		-0.295185		0.330366	-0.151598	50.3777	2.73e-12	0.244529
Total harvest	-4.31866	0.322616	-0.0355403			-0.501272	0.180159	-0.205897		-0.220657				50.5445	2.51e-12	0.244336
Total harvest	-4.20108	0.283131	-0.0209069			-0.193161		-0.100715	-0.102146	-0.347315	0.164332			50.6172	2.42e-12	0.251707
Total harvest	-4.20541	0.255869				-0.195634		-0.0943224	-0.10634	-0.344576	0.164149		-0.0129601	50.8225	2.19e-12	0.251472
Total harvest	-4.25114							-0.0933651	-0.0668449	-0.430678	0.183426	0.175358		50.9511	2.05e-12	0.236333
Total harvest	-4.28822	0.268652	-0.0329832			-0.173245		-0.241105		-0.390352	0.158404			51.2396	1.78e-12	0.243533
Total harvest	-4.35806	0.286383				-0.501911	0.176659	-0.202541		-0.215915			0.00961233	51.3924	1.65e-12	0.243356
Total harvest	-4.25506	0.239955	-0.016413			-0.167494				-0.378407	0.153548	0.191635		51.7699	1.36e-12	0.242919
Total harvest	-4.13409	0.227237	-0.00981551			-0.115597		-0.040685	-0.109413	-0.39667	0.184538	0.206589	-0.0840806	51.8407	1.32e-12	0.265023
Total harvest	-4.31956	0.233052				-0.178793		-0.237858		-0.384341	0.15675		0.00123482	52.0055	1.21e-12	0.242646
Total harvest	-4.14786	0.340404				-0.530915	0.159746	0.0141711	-0.135995					52.0334	1.19e-12	0.235068
Total harvest	-4.25501	0.236473				-0.248736				-0.325713	0.132648			52.2505	1.07e-12	0.227191
Total harvest	-4.23866	0.331395	-0.0240889			-0.508047	0.17657	-0.0902378	-0.0833796	-0.180706				52.2545	1.07e-12	0.249831
Total harvest	-4.18943	0.345548	-0.00140392			-0.555043	0.2114	0.0596406	-0.132517			0.197894		52.5524	9.21e-13	0.249489
Total harvest	-4.3204							-0.257289		-0.44262	0.174841			52.5604	9.18e-13	0.219123
Total harvest	-4.25341	0.303685				-0.508166	0.17421	-0.0835322	-0.0871965	-0.177209			-0.00266243	52.6652	8.71e-13	0.24936
Total harvest	-4.21473					0.0159967		-0.179932		-0.48431	0.188693	0.243469	-0.120953	52.7477	8.36e-13	0.241786
Total harvest	-4.31707	0.32493				-0.560341	0.214648	-0.099963				0.203246		53.0671	7.12e-13	0.233858
Total harvest	-4.23902	0.221151	-0.0243742			-0.0988958		-0.192281		-0.437501	0.17582	0.199589	-0.0672859	53.3907	6.06e-13	0.255939
Total harvest	-4.2495	0.161319	-0.0235534							-0.440637	0.176941	0.243246		53.5337	5.64e-13	0.233312
Total harvest	-4.39756					-0.191968	0.147733	-0.103912	-0.0473885	-0.418867	0.148706	0.235788		53.5475	5.6e-13	0.248346
Total harvest	-4.28569	0.199409	-0.0454186					-0.303839		-0.449295	0.181283			53.5947	5.47e-13	0.23324
Total harvest	-4.16463					-0.0243951				-0.453443	0.1757	0.275237	-0.128692	53.6786	5.25e-13	0.233142
Total harvest	-4.11296					0.0139114		-0.0554595	-0.0880091	-0.455763	0.196244	0.252674	-0.139709	53.682	5.24e-13	0.248192
Total harvest	-4.26166	0.305266				-0.580704	0.223482					0.250081	-0.053779	53.9834	4.51e-13	0.232784
Total harvest	-4.40274	0.307978	-0.0395924			-0.394745	0.136805	-0.237908		-0.356552	0.119077		0.00486584	54.0674	4.32e-13	0.255169
Total harvest	-4.32595					-0.340729	0.206644			-0.262928		0.263278		54.1353	4.18e-13	0.224961
Total harvest	-4.31814					0.00914163		-0.190589		-0.458557	0.180844	0.17726		54.2184	4.01e-13	0.232509
Total harvest	-4.16404	0.135227	-0.0220643							-0.461783	0.18263	0.291533	-0.10461	54.3164	3.81e-13	0.239965
Total harvest	-4.28077	0.314934	-0.0284746			-0.54278	0.168986			-0.19436				54.4587	3.55e-13	0.232226
Total harvest	-4.16653					-0.347182	0.232431	-0.0381797	-0.0572073	-0.270289		0.330066	-0.162355	54.474	3.53e-13	0.247281
Total harvest	-4.34202	0.299923	-0.0310428			-0.462834	0.134705			-0.299942	0.0958329			54.7846	3.02e-13	0.239421
Total harvest	-4.30388	0.312909	-0.0268963			-0.39563	0.127719	-0.111211	-0.0930046	-0.320525	0.126073		-0.00918861	54.8041	2.99e-13	0.261685
Total harvest	-4.21099	0.206415	-0.0354117					-0.190424	-0.0857886	-0.415775	0.186364			54.9413	2.79e-13	0.239239
Total harvest	-4.31483	0.286843				-0.542535	0.166229			-0.190266			0.0100604	54.9831	2.73e-13	0.231611
Total harvest	-4.32186	0.14325						-0.303481		-0.446179	0.180649		-0.00744729	55.0596	2.63e-13	0.231521
Total harvest	-4.19086	0.207273	-0.0160363			-0.141244				-0.403315	0.16126	0.235415	-0.0782036	55.2341	2.41e-13	0.246406
Total harvest	-4.2955	0.334838	-0.0101302			-0.582264	0.216553					0.220068		55.4228	2.19e-13	0.231094
Total harvest	-4.37343	0.267473				-0.463293	0.132077			-0.294445	0.0946789		0.00560897	55.4668	2.15e-13	0.238627
Total harvest	-4.22026	0.159015						-0.182687	-0.0926389	-0.413094	0.18668		-0.0203286	55.5904	2.02e-13	0.238483
Total harvest	-4.25407							-0.164863	-0.0660365	-0.41696	0.177943			55.8188	1.8e-13	0.222963
Total harvest	-4.34631					-0.310541	0.205019	-0.135936		-0.273517		0.237319		56.0954	1.57e-13	0.230303
Total harvest	-4.12126	0.315755	0.00327867			-0.556427	0.223158	0.0853056	-0.143429			0.24244	-0.0767104	56.1471	1.53e-13	0.252797
Total harvest	-4.27101					-0.0319169				-0.423688	0.166224	0.208483		56.2103	1.48e-13	0.222498
Total harvest	-4.10318	0.238782				-0.22031				-0.190363		0.155876		56.886	1.06e-13	0.221694
Total harvest	-4.32816	0.327385	-0.0359233			-0.502257	0.1804	-0.205663		-0.21952			0.0108174	56.9502	1.02e-13	0.244425
Total harvest	-4.18931	0.278563	-0.0206317			-0.192216		-0.0992184	-0.103719	-0.348749	0.164989		-0.0124238	57.0034	9.95e-14	0.251818
Total harvest	-4.25177					0.00699475		-0.0961175	-0.0667159	-0.433333	0.184517	0.177662		57.4147	8.1e-14	0.236356
Total harvest	-4.28944	0.269251	-0.0329992			-0.17341		-0.241002		-0.390112	0.158365		0.00144041	57.7214	6.95e-14	0.243534
Total harvest	-4.13869	0.246761				-0.229483		-0.185497		-0.194491				57.7736	6.77e-14	0.220637
Total harvest	-4.28599							-0.263464		-0.448909	0.176707		-0.0413399	57.8548	6.5e-14	0.220541
Total harvest	-4.31718					-0.0427748		-0.236143		-0.428384	0.168258			58.2607	5.31e-14	0.220057
Total harvest	-4.12708	0.238821				-0.187654		-0.149657		-0.204669		0.13094		58.2749	5.27e-14	0.227733
Total harvest	-4.04157	0.268696				-0.242933		-0.0576063	-0.093079	-0.152191				58.3061	5.19e-14	0.227696
Total harvest	-4.23246	0.262623	-0.024052			-0.245347				-0.32985	0.133685			58.3191	5.16e-14	0.227681
Total harvest	-4.13988	0.351279	-0.00957321			-0.530913	0.160608	0.0125641	-0.135161					58.4497	4.83e-14	0.235147
Total harvest	-4.2793	0.309122				-0.560907	0.22166	-0.0918063				0.230443	-0.0460443	58.4581	4.81e-14	0.235137
Total harvest	-4.15028	0.341212				-0.531036	0.159725	0.0137986	-0.135661				0.0023203	58.5131	4.68e-14	0.235072
Total harvest	-4.25793	0.237743				-0.24897				-0.325236	0.132527		0.00336531	58.7261	4.21e-14	0.2272
Total harvest	-4.23732	0.330911	-0.0240293			-0.508005	0.176554	-0.0899457	-0.0835888	-0.180809			-0.00130991	58.7365	4.18e-14	0.249832
Total harvest	-4.24716	0.317213				-0.557903	0.15296							58.7575	4.14e-14	0.211688
Total harvest	-4.03411	0.259495				-0.201897		-0.0276115	-0.0895482	-0.163803		0.126172		59.2511	3.24e-14	0.234209
Total harvest	-4.10973	0.249568				-0.281686				-0.17169				59.3704	3.05e-14	0.210949
Total harvest	-4.30422	0.341406	-0.0145339			-0.560918	0.216203	-0.101749				0.202323		59.3999	3e-14	0.234034
Total harvest	-4.40127					-0.185886	0.0975101	-0.232918		-0.408984	0.143128			59.5507	2.78e-14	0.226225
Total harvest	-4.27357	0.32				-0.530504	0.159392	-0.149784						59.7282	2.55e-14	0.218305
Total harvest	-4.2798	0.197047	-0.0453505					-0.304077		-0.450241	0.181501		-0.00698193	60.0456	2.17e-14	0.233278
Total harvest	-4.19993							-0.161023	-0.0750196	-0.421808	0.181209		-0.0547395	60.2948	1.92e-14	0.225345
Total harvest	-4.25453	0.314813	-0.00830292			-0.58125	0.224314					0.249596	-0.0533604	60.4165	1.81e-14	0.232843
Total harvest	-4.2904	0.319576	-0.0288086			-0.543444	0.169185			-0.193291			0.0109314	60.8625	1.45e-14	0.23232
Total harvest	-3.9611	0.30351				-0.285862		0.0295459	-0.136216					61.0976	1.29e-14	0.216666
Total harvest	-4.1926	0.200192	-0.0349333					-0.188073	-0.0882942	-0.417367	0.187206		-0.0193149	61.1854	1.23e-14	0.239517
Total harvest	-4.34745	0.302605	-0.0311961			-0.463474	0.134901			-0.298969	0.0955244		0.00635228	61.241	1.2e-14	0.239452
Total harvest	-4.25029					-0.0449119		-0.141888	-0.0667646	-0.402334	0.171477			61.4504	1.08e-14	0.223974
Total harvest	-4.30199					-0.3037	0.20005	-0.0847206	-0.0364895	-0.256922		0.233381		61.5923	1e-14	0.231462
Total harvest	-4.05226	0.216772				-0.203897				-0.200269		0.185176	-0.0544261	61.8843	8.67e-15	0.223459
Total harvest	-4.10787	0.146991						-0.202665		-0.244033		0.177369		62.2512	7.22e-15	0.215283
Total harvest	-4.09263	0.250683	-0.0106739			-0.21944				-0.191364		0.154934		63.2886	4.3e-15	0.22179
Total harvest	-4.27864					-0.0493075		-0.239281		-0.433185	0.169284		-0.0456378	63.3169	4.24e-15	0.221757
Total harvest	-3.95014	0.297836				-0.254856		0.0593567	-0.13585			0.106855		63.4531	3.96e-15	0.221594
Total harvest	-4.33704					-0.174385	0.0891605	-0.153818	-0.0563389	-0.388141	0.1474			63.7102	3.48e-15	0.22897
Total harvest	-4.08356	0.220292				-0.174672		-0.143774		-0.212167		0.15697	-0.0454029	63.7351	3.44e-15	0.22894
Total harvest	-4.11458	0.273753	-0.0246049			-0.225637		-0.187819		-0.197175				63.8326	3.27e-15	0.221143
Total harvest	-4.24975									-0.400388	0.160487			64.131	2.82e-15	0.197266
Total harvest	-3.97502	0.237799				-0.186755		-0.0141636	-0.0942674	-0.17056		0.157797	-0.0565718	64.1656	2.77e-15	0.236043
Total harvest	-4.14564	0.24977				-0.230164		-0.185166		-0.193669			0.00777312	64.2182	2.7e-15	0.220683
Total harvest	-4.36203					-0.197217	0.0996295	-0.23629		-0.413548	0.14366		-0.0489937	64.3742	2.5e-15	0.228186
Total harvest	-4.10988	0.258624	-0.0177376			-0.185661		-0.151993		-0.206411		0.129037		64.5396	2.3e-15	0.227991
Total harvest	-4.02694	0.160647						-0.0999241	-0.0764742	-0.210591		0.175939		64.6165	2.21e-15	0.220208
Total harvest	-4.02987	0.28367	-0.0136754			-0.240769		-0.0608938	-0.0913584	-0.154225				64.6575	2.17e-15	0.227852
Total harvest	-4.03833	0.267573				-0.24272		-0.0572838	-0.0934224	-0.152386			-0.00322475	64.7827	2.04e-15	0.227704
Total harvest	-4.23539	0.263924	-0.0240633			-0.24559				-0.329368	0.133563		0.00339671	64.7946	2.02e-15	0.22769
Total harvest	-4.26886	0.323528	-0.0125002			-0.561284	0.222851	-0.0934462				0.229332	-0.0452429	64.8297	1.99e-15	0.235267
Total harvest	-4.26984	0.32606				-0.559358	0.153255						0.0242744	64.8492	1.97e-15	0.21216
Total harvest	-4.14279	0.352432	-0.00970906			-0.531068	0.160602	0.0120634	-0.13473				0.00287473	64.9276	1.89e-15	0.235153
Total harvest	-4.23311	0.334444	-0.0154958			-0.558331	0.15455							65.0656	1.77e-15	0.211899
Total harvest	-4.25387					-0.106543				-0.372477	0.145435			65.0728	1.76e-15	0.204039
Total harvest	-4.19057					-0.0537551		-0.132658	-0.0766693	-0.40491	0.173808		-0.0596695	65.5868	1.36e-15	0.226754
Total harvest	-4.09197	0.269135	-0.017914			-0.279328				-0.173656				65.6251	1.34e-15	0.211225
Total harvest	-4.07005	0.12032								-0.235115		0.222049		65.6654	1.31e-15	0.203317
Total harvest	-4.02862	0.266802	-0.00655576			-0.201159		-0.0295067	-0.0886856	-0.16472		0.125422		65.704	1.28e-15	0.234244
Total harvest	-4.29877	0.329877				-0.532465	0.159864	-0.150427					0.0266949	65.7401	1.26e-15	0.218868
Total harvest	-4.24867	0.0977813								-0.397934	0.163302			65.7417	1.26e-15	0.203224
Total harvest	-4.11751	0.252803				-0.282203				-0.17081			0.00862429	65.8052	1.22e-15	0.211007
Total harvest	-4.25511	0.342884	-0.0206472			-0.530547	0.161556	-0.151692						65.9071	1.16e-15	0.218668
Total harvest	-4.03916	0.127915						-0.189482		-0.25207		0.214331	-0.073804	65.9259	1.15e-15	0.218646
Total harvest	-3.97366									-0.253151		0.256941	-0.112674	66.1659	1.02e-15	0.202707
Total harvest	-4.33899					-0.248498	0.0971776			-0.355432	0.121127			66.3209	9.43e-16	0.210385
Total harvest	-4.10885							-0.162995		-0.248633		0.160561		66.4312	8.93e-16	0.202384
Total harvest	-4.29588					-0.290562	0.144869	-0.196432		-0.249537				66.5742	8.31e-16	0.210079
Total harvest	-4.07615									-0.239774		0.201318		66.6038	8.19e-16	0.194225
Total harvest	-4.07028	0.285743				-0.319168								66.6668	7.94e-16	0.194148
Total harvest	-4.01137							-0.151715		-0.259742		0.215737	-0.10468	66.9499	6.89e-16	0.209625
Total harvest	-4.06197	0.280608				-0.275751						0.124856		67.1254	6.31e-16	0.201537
Total harvest	-3.93948	0.14011						-0.0748788	-0.0844217	-0.215969		0.21769	-0.0849514	67.4373	5.4e-16	0.224563
Total harvest	-3.96343	0.304259				-0.286005		0.0291894	-0.135934				0.00221246	67.5775	5.03e-16	0.21667
Total harvest	-3.96004	0.304773	-0.00112333			-0.285721		0.0293771	-0.136134					67.5797	5.03e-16	0.216667
Total harvest	-4.27636					-0.187302	0.0909276	-0.143529	-0.0670899	-0.389923	0.149144		-0.0617677	67.6626	4.82e-16	0.231947
Total harvest	-4.11773	0.131251						-0.270305		-0.237858				67.7988	4.51e-16	0.200714
Total harvest	-3.98892	0.0991301								-0.246146		0.263114	-0.0901967	67.9266	4.23e-16	0.208444
Total harvest	-4.08138	0.179718	-0.0276385					-0.205055		-0.245406		0.173192		68.1938	3.7e-16	0.215931
Total harvest	-4.04249	0.22805	-0.0100667			-0.203054				-0.201214		0.184329	-0.0542352	68.2956	3.51e-16	0.223545
Total harvest	-4.08745	0.287129				-0.285364		-0.136163						68.7363	2.82e-16	0.199568
Total harvest	-3.90487	0.283512				-0.245616		0.0719556	-0.140958			0.128601	-0.040619	69.1134	2.34e-16	0.222573
Total harvest	-4.25385					-0.32903	0.136138			-0.225675				69.6334	1.8e-16	0.198469
Total harvest	-4.11775							-0.228869		-0.243107				69.7246	1.72e-16	0.190371
Total harvest	-3.9244							-0.051022	-0.0708854	-0.22965		0.219645	-0.116796	69.8278	1.63e-16	0.21397
Total harvest	-3.95576	0.290918	0.00607917			-0.255347		0.0606075	-0.136337			0.107658		69.9107	1.57e-16	0.221625
Total harvest	-4.03451	0.146928						-0.164553	-0.0783542	-0.202911				69.9575	1.53e-16	0.205982
Total harvest	-4.0679	0.239126	-0.0166953			-0.172863		-0.145985		-0.213734		0.155072	-0.044854	70.0238	1.48e-16	0.229169
Total harvest	-4.22599									-0.403857	0.16173		-0.0274986	70.0769	1.44e-16	0.197925
Total harvest	-3.98959					-0.073051				-0.24027		0.226215	-0.110206	70.1537	1.39e-16	0.205744
Total harvest	-4.12157	0.276874	-0.0246633			-0.226334		-0.187499		-0.196343			0.00787697	70.276	1.31e-16	0.22119
Total harvest	-4.09024					-0.0768068				-0.226895		0.17043		70.328	1.27e-16	0.197617
Total harvest	-4.21789					-0.114319				-0.375968	0.146132		-0.0420037	70.345	1.26e-16	0.205511
Total harvest	-4.04858							-0.0830298	-0.0563145	-0.224036		0.159405		70.5929	1.11e-16	0.20521
Total harvest	-3.97155	0.242848	-0.00445393			-0.186291		-0.0154986	-0.0936476	-0.17116		0.157224	-0.056328	70.6346	1.09e-16	0.23606
Total harvest	-4.01256	0.18129	-0.0176065					-0.104491	-0.0740345	-0.212305		0.173162		70.882	9.64e-17	0.220468
Total harvest	-4.20948	0.147022	-0.0416985							-0.402028	0.163868			70.9206	9.46e-17	0.204812
Total harvest	-4.07627	0.282552				-0.254977		-0.106632				0.107539		70.9934	9.12e-17	0.204723
Total harvest	-4.02696	0.282581	-0.0136184			-0.240581		-0.0605858	-0.0916776	-0.154392			-0.00294044	71.1352	8.5e-17	0.227858
Total harvest	-4.25553	0.344641	-0.0164754			-0.559995	0.155007						0.0248846	71.1364	8.49e-17	0.212396
Total harvest	-4.30219					-0.26059	0.098998			-0.358719	0.121429		-0.0451797	71.3879	7.49e-17	0.212093
Total harvest	-4.24104					-0.283675	0.140495	-0.129861	-0.0465701	-0.228556				71.4481	7.27e-17	0.21202
Total harvest	-4.25743					-0.302596	0.146958	-0.19935		-0.253097			-0.0474808	71.4978	7.09e-17	0.21196
Total harvest	-4.05004	0.144494	-0.0205924							-0.236187		0.219208		71.8424	5.97e-17	0.20369
Total harvest	-4.28021	0.354525	-0.021854			-0.532819	0.162273	-0.152492					0.0276109	71.8846	5.84e-17	0.219272
Total harvest	-4.01609	0.158087	-0.0252204					-0.191659		-0.253239		0.210407	-0.0725988	71.9557	5.64e-17	0.219187
Total harvest	-4.11415					-0.0470742		-0.144797		-0.240101		0.145575		71.97	5.6e-17	0.203535
Total harvest	-4.09974	0.272418	-0.0179402			-0.279858				-0.172776			0.00864153	72.0594	5.35e-17	0.211283
Total harvest	-4.24524	0.0964757								-0.398426	0.163474		-0.00399813	72.2142	4.95e-17	0.203237
Total harvest	-4.01736					-0.0445073		-0.133674		-0.251409		0.201147	-0.103606	72.5968	4.09e-17	0.210635
Total harvest	-4.12634					-0.087472		-0.184795		-0.229559				72.7574	3.78e-17	0.194631
Total harvest	-4.09085	0.29344				-0.320441							0.0221026	72.8313	3.64e-17	0.19454
Total harvest	-4.07718	0.180978	-0.0418968					-0.270623		-0.240007				73.0111	3.33e-17	0.202266
Total harvest	-4.06462	0.291776	-0.00553971			-0.31848								73.1276	3.14e-17	0.194175
Total harvest	-4.04051	0.272659				-0.270228						0.136052	-0.0220133	73.3543	2.8e-17	0.201847
Total harvest	-4.06306	0.279434	0.00107149			-0.275827						0.124964		73.6078	2.47e-17	0.201538
Total harvest	-4.05531							-0.145446	-0.0583028	-0.217295				73.7128	2.34e-17	0.193454
Total harvest	-3.92932	0.156344	-0.0136439					-0.0785477	-0.0824186	-0.21726		0.215391	-0.0840115	73.7884	2.25e-17	0.22472
Total harvest	-3.96235	0.305593	-0.00117815			-0.285861		0.0290089	-0.135844				0.00224294	74.0596	1.97e-17	0.216671
Total harvest	-3.97098	0.121593	-0.0189996							-0.247122		0.260671	-0.0896296	74.147	1.88e-17	0.208762
Total harvest	-4.11597	0.130609						-0.270451		-0.238023			-0.00199645	74.2792	1.76e-17	0.200718
Total harvest	-4.09622					-0.135297				-0.207774				74.4227	1.64e-17	0.184534
Total harvest	-4.21734					-0.34153	0.137889			-0.228496			-0.0444942	74.7453	1.4e-17	0.200148
Total harvest	-4.10978	0.295556				-0.286889		-0.136605					0.0239262	74.8478	1.33e-17	0.200022
Total harvest	-4.07726	0.298068	-0.0100639			-0.283869		-0.137099						75.1483	1.14e-17	0.199655
Total harvest	-3.92981					-0.0460284		-0.0318361	-0.0713735	-0.221034		0.204934	-0.115876	75.4314	9.92e-18	0.215026
Total harvest	-4.08905							-0.233875		-0.245972			-0.0323874	75.4797	9.68e-18	0.191272
Total harvest	-3.91166	0.274173	0.00803367			-0.246173		0.0737685	-0.141683			0.129877	-0.0411877	75.5516	9.34e-18	0.222626
Total harvest	-4.00727	0.185147	-0.0325845					-0.169951	-0.0741275	-0.206053				75.6763	8.77e-18	0.206909
Total harvest	-4.18395					-0.297694	0.142784	-0.120299	-0.0560474	-0.228438			-0.0576322	75.7152	8.6e-18	0.214686
Total harvest	-4.05349					-0.0482296		-0.063989	-0.0567404	-0.21528		0.14426		76.0977	7.11e-18	0.206398
Total harvest	-4.02295	0.143524						-0.163585	-0.0795962	-0.203345			-0.0115382	76.3555	6.25e-18	0.206085
Total harvest	-4.06378					-0.0881544		-0.101314	-0.0584091	-0.204047				76.7392	5.16e-18	0.197705
Total harvest	-3.90865	0.177774						-0.00610156	-0.13697			0.160415		77.1529	4.19e-18	0.197198
Total harvest	-4.06928									-0.222006				77.3605	3.78e-18	0.172702
Total harvest	-4.06258	0.277516				-0.251857		-0.104238				0.11505	-0.0136967	77.3795	3.74e-18	0.204841
Total harvest	-4.20585	0.145652	-0.0417112							-0.402545	0.164042		-0.0042221	77.3918	3.72e-18	0.204826
Total harvest	-4.07241	0.286813	-0.00385929			-0.254559		-0.107163				0.107113		77.466	3.59e-18	0.204736
Total harvest	-4.0005					-0.335738	0.192176	0.0911626	-0.128863			0.269149	-0.146394	77.8602	2.94e-18	0.212106
Total harvest	-4.09004					-0.0939525		-0.18697		-0.232471			-0.0415929	78.0637	2.66e-18	0.196079
Total harvest	-4.14432					-0.367421	0.197386					0.271272	-0.120412	78.8737	1.77e-18	0.195083
Total harvest	-4.01111							-0.143511	-0.0644542	-0.218117			-0.0425026	78.9788	1.68e-18	0.194953
Total harvest	-4.08494	0.29982	-0.00583211			-0.319753							0.0221619	79.29	1.44e-18	0.19457
Total harvest	-4.07558	0.180373	-0.0418816					-0.270751		-0.240145			-0.00182272	79.492	1.3e-18	0.202269
Total harvest	-4.04211	0.270837	0.00163376			-0.270348						0.13623	-0.0220732	79.8356	1.1e-18	0.201849
Total harvest	-4.06166					-0.142707				-0.210077			-0.0393966	79.8479	1.09e-18	0.185852
Total harvest	-4.06456	0.0884617								-0.216136				79.8668	1.08e-18	0.177717
Total harvest	-4.23016					-0.33402	0.173243					0.204203		80.288	8.74e-19	0.185304
Total harvest	-3.91895	0.166463						-0.0649852	-0.136652					80.8175	6.71e-19	0.184644
Total harvest	-3.82958	0.160948						0.0172011	-0.145762			0.195804	-0.0736182	80.8654	6.55e-19	0.200592
Total harvest	-4.09933	0.306997	-0.0104547			-0.285381		-0.13759					0.0240702	81.2545	5.39e-19	0.200116
Total harvest	-4.01028					-0.0964613		-0.0938126	-0.0659596	-0.20399			-0.0521325	81.4279	4.95e-19	0.199904
Total harvest	-3.99654	0.181679	-0.0323729					-0.168946	-0.0753271	-0.206432			-0.0108779	82.0832	3.56e-19	0.207002
Total harvest	-4.12808					-0.293761	0.16211	0.0463126	-0.106578			0.185427		82.4194	3.01e-19	0.19869
Total harvest	-4.0509									-0.223432			-0.0200149	83.5595	1.7e-19	0.173061
Total harvest	-3.90268	0.185791	-0.00677893					-0.00752911	-0.136271			0.159228		83.6033	1.67e-19	0.197238
Total harvest	-4.05939	0.281284	-0.00336082			-0.251528		-0.104726				0.114601	-0.013531	83.8546	1.47e-19	0.204851
Total harvest	-4.15664					-0.350713	0.195892	-0.071039				0.257337	-0.115896	84.1575	1.26e-19	0.196557
Total harvest	-4.24135					-0.315867	0.172318	-0.087108				0.189179		84.9301	8.59e-20	0.187594
Total harvest	-4.03618	0.158212						-0.175382				0.15956		85.0679	8.01e-20	0.179328
Total harvest	-4.02676	0.134921	-0.0392064							-0.218591				85.2032	7.49e-20	0.179158
Total harvest	-4.00742	0.133216										0.19251		85.926	5.22e-20	0.170064
Total harvest	-3.92281							0.0265378	-0.119607			0.143322		86.2078	4.53e-20	0.177896
Total harvest	-4.06585	0.0889394								-0.216111			0.00141542	86.3485	4.22e-20	0.177719
Total harvest	-3.80311							0.0574718	-0.135461			0.197864	-0.108895	86.3989	4.12e-20	0.185767
Total harvest	-4.09079					-0.275204	0.115632	0.00254876	-0.109011					86.8956	3.21e-20	0.185149
Total harvest	-3.89883	0.192725	-0.0222741					-0.0673649	-0.134598					86.9387	3.14e-20	0.185095
Total harvest	-3.9113	0.164417						-0.0641242	-0.137591				-0.00737837	87.266	2.67e-20	0.184687
Total harvest	-3.82724	0.164461	-0.0029261					0.0165459	-0.145433			0.195245	-0.073396	87.3422	2.57e-20	0.200599
Total harvest	-3.93228							-0.0294984	-0.119359					87.7367	2.11e-20	0.167763
Total harvest	-4.17916					-0.317427	0.117691							87.806	2.04e-20	0.167674
Total harvest	-3.95329					-0.116474		0.0186261	-0.114557					88.1735	1.7e-20	0.175421
Total harvest	-4.01312											0.170335		88.6756	1.32e-20	0.158264
Total harvest	-4.04611	0.144966						-0.23165						88.683	1.31e-20	0.166558
Total harvest	-4.03816					-0.111699						0.132739		89.1478	1.04e-20	0.165965
Total harvest	-4.04601					-0.152628								89.4001	9.19e-21	0.157331
Total harvest	-3.94003					-0.0861943		0.0536016	-0.11577			0.120252		89.4866	8.8e-21	0.181914
Total harvest	-3.82048					-0.0862525		0.0867363	-0.131787			0.17504	-0.108437	89.7003	7.91e-21	0.189719
Total harvest	-4.20314					-0.292825	0.122829	-0.134165						89.8688	7.27e-21	0.173281
Total harvest	-3.99091	0.146978						-0.166843				0.182756	-0.0469163	90.3916	5.59e-21	0.180781
Total harvest	-3.9502	0.120052										0.219845	-0.0611095	90.4243	5.5e-21	0.172579
Total harvest	-4.03607							-0.128642				0.142514		91.0328	4.06e-21	0.163558
Total harvest	-3.9317											0.21191	-0.0861637	91.0613	4e-21	0.163521
Total harvest	-4.03252					-0.290017	0.11884	0.0121521	-0.118909				-0.0593219	91.0649	4e-21	0.188027
Total harvest	-4.01648	0.18177	-0.0202001					-0.177418				0.15639		91.2636	3.62e-21	0.179688
Total harvest	-3.9581					-0.110945						0.17404	-0.0848938	91.6075	3.05e-21	0.17108
Total harvest	-4.0277	0.135295	-0.0392212							-0.218617			0.00104481	91.6855	2.93e-21	0.179159
Total harvest	-4.0629					-0.123054		-0.125462						92.1064	2.37e-21	0.162184
Total harvest	-3.99398	0.148883	-0.0135751									0.190504		92.2764	2.18e-21	0.170232
Total harvest	-4.0449							-0.182838						92.5394	1.91e-21	0.153277
Total harvest	-3.89778					-0.124798		0.0268018	-0.12265				-0.0535026	92.7846	1.69e-21	0.177778
Total harvest	-3.88824							-0.0270635	-0.125815				-0.0415478	93.0702	1.47e-21	0.169224
Total harvest	-3.89173	0.190636	-0.022145					-0.0665037	-0.135497				-0.00695361	93.3909	1.25e-21	0.185134
Total harvest	-4.14951					-0.326479	0.119041						-0.0350695	93.4409	1.22e-21	0.168753
Total harvest	-4.05133					-0.0940046		-0.0934305				0.117502		93.6031	1.12e-21	0.168547
Total harvest	-3.95914							-0.119617				0.183718	-0.0797361	94.0174	9.13e-22	0.16802
Total harvest	-4.01247	0.184796	-0.034143					-0.232382						94.3256	7.83e-22	0.167628
Total harvest	-4.01147													94.8177	6.12e-22	0.141857
Total harvest	-4.05887	0.1491						-0.231409					0.0138423	95.0391	5.48e-22	0.166719
Total harvest	-4.01803					-0.158148							-0.0311281	95.2231	5e-22	0.158181
Total harvest	-4.00726	0.106706												95.3923	4.59e-22	0.149575
Total harvest	-4.17331					-0.301385	0.124207	-0.1349					-0.0353372	95.4919	4.37e-22	0.174368
Total harvest	-3.97424					-0.0947458		-0.0823893				0.158926	-0.0799615	96.5476	2.58e-22	0.173034
Total harvest	-3.97407	0.168539	-0.018308					-0.168699				0.179617	-0.0458523	96.6375	2.46e-22	0.181078
Total harvest	-3.93878	0.134015	-0.0119828									0.218087	-0.0606385	96.8039	2.27e-22	0.17271
Total harvest	-4.03493					-0.128114		-0.125955					-0.0311469	97.9314	1.29e-22	0.163026
Total harvest	-4.02797							-0.185007					-0.0184195	98.7873	8.41e-23	0.153581
Total harvest	-4.02528	0.189162	-0.0342727					-0.232205					0.0140293	100.677	3.27e-23	0.167795
Total harvest	-3.97664	0.143004	-0.031082											101.158	2.57e-23	0.150507
Total harvest	-4.00066												-0.0114776	101.208	2.51e-23	0.141978
Total harvest	-4.01986	0.110803											0.0135542	101.753	1.91e-23	0.149734
Total harvest	-3.98903	0.14702	-0.0310719										0.0133377	107.522	1.07e-24	0.150662
Resident licence, male caribou	-5.33956	0.204562		-0.745065	0.205997					-0.335298	0.167941			0	0.660613	0.32209
Resident licence, male caribou	-5.24968	0.240981		-0.784423	0.240277			0.157336	-0.137887	-0.288829	0.17695			3.27913	0.128202	0.332058
Resident licence, male caribou	-5.30136	0.254038	-0.0405062	-0.748402	0.205304					-0.339524	0.168862			5.62433	0.0396862	0.32298
Resident licence, male caribou	-5.33889	0.200669		-0.753038	0.204358					-0.32909	0.166261	-0.0403337		6.01652	0.0326194	0.322574
Resident licence, male caribou	-5.34335	0.207454		-0.737772	0.204934			-0.0261833		-0.339682	0.16979			6.3571	0.0275119	0.322221
Resident licence, male caribou	-5.3337	0.202533		-0.746245	0.206669					-0.335522	0.167964		-0.00719509	6.46102	0.0261189	0.322113
Resident licence, male caribou	-5.17559	0.230185		-0.882049	0.257476									7.51801	0.0153969	0.300521
Resident licence, male caribou	-5.07571	0.251911		-0.916058	0.298172			0.218328	-0.150371					7.96139	0.0123354	0.313788
Resident licence, male caribou	-5.19974	0.208303		-0.83507	0.256049					-0.130599				8.28943	0.0104694	0.306604
Resident licence, male caribou	-5.33329			-0.672666	0.197824					-0.374984	0.172384			8.97893	0.00741649	0.305872
Resident licence, male caribou	-5.25203	0.238685		-0.787742	0.237888			0.143095	-0.136136	-0.285749	0.176198	-0.0369837		9.39716	0.00601699	0.33243
Resident licence, male caribou	-5.22497	0.233749		-0.789984	0.24368			0.162592	-0.141245	-0.288452	0.177388		-0.0275061	9.44695	0.00586904	0.33238
Resident licence, male caribou	-5.22947	0.269129	-0.0235875	-0.786306	0.239598			0.156084	-0.134824	-0.291694	0.177225			9.47015	0.00580138	0.332356
Resident licence, male caribou	-5.29819	0.252725	-0.043055	-0.757249	0.203379					-0.332892	0.167053	-0.045025		11.5319	0.00206933	0.323576
Resident licence, male caribou	-5.30531	0.255753	-0.0398392	-0.74204	0.204465			-0.0227124		-0.343216	0.170443			12.0127	0.0016271	0.323078
Resident licence, male caribou	-5.29352	0.251857	-0.0408627	-0.74988	0.206131					-0.339882	0.168911		-0.00919917	12.0712	0.00158023	0.323018
Resident licence, male caribou	-5.34484	0.204445		-0.742947	0.202242			-0.0419453		-0.334941	0.168938	-0.0489655		12.1985	0.00148277	0.322886
Resident licence, male caribou	-5.34482	0.202478		-0.752521	0.203505					-0.328349	0.166075	-0.0439468	0.00741378	12.4803	0.00128793	0.322594
Resident licence, male caribou	-5.17637	0.222621		-0.888351	0.252292							-0.064992		12.7574	0.00112126	0.30185
Resident licence, male caribou	-5.10442	0.238041		-0.884211	0.292997			0.183902	-0.130961	-0.0758152				12.765	0.00111701	0.315548
Resident licence, male caribou	-5.33786	0.205537		-0.738949	0.205571			-0.0258924		-0.339854	0.169789		-0.006693	12.821	0.00108616	0.322241
Resident licence, male caribou	-5.15284	0.194744		-0.44245						-0.407128	0.22527			13.1572	0.000918136	0.301423
Resident licence, male caribou	-5.1449	0.267594	-0.0307533	-0.88505	0.256657									13.5106	0.000769421	0.301046
Resident licence, male caribou	-5.07957	0.248399		-0.917492	0.293724			0.199944	-0.147534			-0.0469244		13.8456	0.000650743	0.314416
Resident licence, male caribou	-5.17319	0.226503		-0.887249	0.257719			0.028381						13.8533	0.000648233	0.300679
Resident licence, male caribou	-5.19965	0.203354		-0.842811	0.252141					-0.125865		-0.0517952		13.9955	0.000603773	0.307427
Resident licence, male caribou	-5.17301	0.229328		-0.882496	0.257736								-0.00308683	13.997	0.000603309	0.300526
Resident licence, male caribou	-5.28866			-0.688741	0.203845					-0.37348	0.172163		-0.0556828	14.0635	0.000583568	0.307355
Resident licence, male caribou	-5.16434	0.253238	-0.0367943	-0.838637	0.255757					-0.133268				14.0663	0.000582768	0.307352
Resident licence, male caribou	-5.3323			-0.689567	0.195375					-0.362875	0.16955	-0.0676515		14.1604	0.000555985	0.307252
Resident licence, male caribou	-5.05255	0.244956		-0.920385	0.301135			0.222633	-0.153128				-0.0255472	14.1694	0.000553489	0.314076
Resident licence, male caribou	-5.05995	0.272614	-0.0171416	-0.918077	0.297668			0.218202	-0.148605					14.2897	0.000521178	0.31395
Resident licence, male caribou	-5.19397	0.206317		-0.836052	0.256632					-0.13082			-0.00696052	14.7518	0.000413644	0.306626
Resident licence, male caribou	-5.19872	0.207326		-0.836981	0.256001			0.0088729		-0.129848				14.7581	0.000412354	0.306619
Resident licence, male caribou	-5.3301			-0.679017	0.19847			0.0198841		-0.370985	0.170887			15.3853	0.00030135	0.305954
Resident licence, male caribou	-5.22999	0.269301	-0.0258708	-0.789979	0.236965			0.140744	-0.132686	-0.288616	0.17643	-0.0399263		15.5311	0.000280164	0.332787
Resident licence, male caribou	-5.20373	0.262373	-0.0241568	-0.791945	0.243011			0.161489	-0.138156	-0.291421	0.177682		-0.028095	15.6234	0.000267524	0.332693
Resident licence, male caribou	-5.23532	0.234547		-0.790531	0.240737			0.150304	-0.138796	-0.286347	0.176693	-0.0271207	-0.0179311	15.7707	0.000248529	0.332542
Resident licence, male caribou	-5.26257			-0.706601	0.222839			0.155724	-0.0959147	-0.337704	0.175618			16.8724	0.000143269	0.311235
Resident licence, male caribou	-5.30458	0.255352	-0.0422825	-0.747702	0.201542			-0.0392926		-0.338263	0.169546	-0.0529651		17.7502	9.24e-05	0.323849
Resident licence, male caribou	-5.19029			-0.75895	0.247707					-0.170355				17.7917	9.05e-05	0.289446
Resident licence, male caribou	-5.30372	0.254269	-0.0429885	-0.756838	0.202619					-0.332101	0.166862	-0.0484764	0.00681163	17.9986	8.16e-05	0.323593
Resident licence, male caribou	-5.29784	0.253655	-0.0401862	-0.743559	0.205266			-0.0222648		-0.343494	0.170452		-0.00869098	18.4634	6.47e-05	0.323112
Resident licence, male caribou	-5.14144	0.264698	-0.0350646	-0.89189	0.251023							-0.0690492		18.6051	6.02e-05	0.302528
Resident licence, male caribou	-5.35491	0.207596		-0.741604	0.200788			-0.0444904		-0.334071	0.168838	-0.0554213	0.0120067	18.6315	5.95e-05	0.322938
Resident licence, male caribou	-5.11243	0.247514	-0.0429521	-0.446472						-0.409756	0.2262			18.6586	5.87e-05	0.302471
Resident licence, male caribou	-5.1072	0.235309		-0.886789	0.28919			0.167998	-0.128929	-0.073535		-0.0427126		18.7546	5.59e-05	0.316064
Resident licence, male caribou	-5.15291	0.189945		-0.455888						-0.397049	0.221556	-0.0507278		18.8919	5.22e-05	0.302222
Resident licence, male caribou	-5.08205	0.231452		-0.888674	0.295873			0.188155	-0.133692	-0.0753691			-0.0245587	18.9931	4.96e-05	0.315814
Resident licence, male caribou	-5.08558	0.263895	-0.02166	-0.88602	0.29232			0.182573	-0.128091	-0.0780985				19.0034	4.94e-05	0.315804
Resident licence, male caribou	-5.1952	0.227668		-0.886068	0.249445							-0.0764786	0.0225444	19.0569	4.81e-05	0.302046
Resident licence, male caribou	-5.17564	0.221733		-0.889784	0.252508			0.00847446				-0.0633073		19.2282	4.41e-05	0.301863
Resident licence, male caribou	-5.1611	0.199854		-0.433202				-0.0419711		-0.413611	0.228686			19.3052	4.24e-05	0.301781
Resident licence, male caribou	-5.16604	0.198848		-0.442084						-0.406229	0.224928		0.0145976	19.551	3.75e-05	0.301519
Resident licence, male caribou	-5.16104	0.251768	-0.0400963	-0.847055	0.251443					-0.128392		-0.0562296		19.6433	3.58e-05	0.308311
Resident licence, male caribou	-5.14124	0.264751	-0.0317574	-0.890889	0.256854			0.0312261						19.815	3.29e-05	0.301237
Resident licence, male caribou	-5.14125	0.266567	-0.0308769	-0.88566	0.257005								-0.00421936	19.9859	3.02e-05	0.301054
Resident licence, male caribou	-5.30037			-0.696054	0.200443					-0.36557	0.170343	-0.0465381	-0.0403332	20.0265	2.96e-05	0.307906
Resident licence, male caribou	-5.06112	0.272597	-0.0202447	-0.919858	0.292903			0.198985	-0.145342			-0.0494153		20.1141	2.83e-05	0.314641
Resident licence, male caribou	-5.06911	0.245888		-0.919206	0.295537			0.204175	-0.149094			-0.0407475	-0.0109509	20.2876	2.6e-05	0.314459
Resident licence, male caribou	-5.17007	0.225445		-0.887835	0.258041			0.0285809					-0.00371926	20.3305	2.54e-05	0.300686
Resident licence, male caribou	-5.21036	0.206479		-0.841914	0.250528					-0.124805		-0.0585507	0.0130165	20.4185	2.43e-05	0.307491
Resident licence, male caribou	-5.20045	0.204049		-0.841309	0.252009			-0.007633		-0.126382		-0.0532825		20.4686	2.37e-05	0.307438
Resident licence, male caribou	-5.28586			-0.694669	0.204469			0.0187422		-0.369719	0.170766		-0.0554851	20.4787	2.36e-05	0.307427
Resident licence, male caribou	-5.03598	0.266102	-0.0176206	-0.922476	0.300633			0.222632	-0.151343				-0.025932	20.4887	2.35e-05	0.314248
Resident licence, male caribou	-5.15285			-0.389548						-0.434751	0.22578			20.5136	2.32e-05	0.286483
Resident licence, male caribou	-5.15692	0.25113	-0.0370936	-0.839832	0.256456					-0.133588			-0.00860095	20.5176	2.32e-05	0.307386
Resident licence, male caribou	-5.16261	0.252354	-0.0371597	-0.841284	0.255676			0.012025		-0.132293				20.5228	2.31e-05	0.30738
Resident licence, male caribou	-5.33262			-0.68873	0.195177			-0.00281341		-0.363328	0.169711	-0.0682788		20.6422	2.18e-05	0.307254
Resident licence, male caribou	-5.19103			-0.731817	0.234603			0.172077	-0.109581	-0.331543	0.1768		-0.0782914	20.6875	2.13e-05	0.31404
Resident licence, male caribou	-5.19281	0.205268		-0.838061	0.256606			0.00916042		-0.13007			-0.00711025	21.2196	1.63e-05	0.306642
Resident licence, male caribou	-5.15483			-0.811742	0.245256									21.4984	1.42e-05	0.278289
Resident licence, male caribou	-5.08605	0.220257		-0.430556				0.0712928	-0.0841998	-0.389246	0.241577			21.8692	1.18e-05	0.305953
Resident licence, male caribou	-5.21393	0.265003	-0.0256516	-0.792633	0.239711			0.147809	-0.135278	-0.289209	0.176918	-0.0302354	-0.0174466	21.9103	1.15e-05	0.332893
Resident licence, male caribou	-5.26665			-0.714464	0.219383			0.132106	-0.0933507	-0.331521	0.174387	-0.0605383		22.4015	9.03e-06	0.312239
Resident licence, male caribou	-5.19021			-0.775268	0.242096					-0.160451		-0.0795232		22.4715	8.72e-06	0.291403
Resident licence, male caribou	-5.14473			-0.774259	0.253279					-0.169034			-0.0562862	22.8345	7.27e-06	0.29101
Resident licence, male caribou	-5.18397			-0.773816	0.247502			0.0544093		-0.164006				23.7105	4.69e-06	0.290059
Resident licence, male caribou	-5.31408	0.258092	-0.042146	-0.746399	0.200187			-0.0417688		-0.33731	0.169392	-0.0591734	0.0112334	24.1896	3.69e-06	0.323895
Resident licence, male caribou	-5.10924	0.246415	-0.0464719	-0.461491						-0.398816	0.222152	-0.0563386		24.23	3.62e-06	0.303443
Resident licence, male caribou	-5.06641			-0.851145	0.278395			0.249018	-0.12035					24.5327	3.11e-06	0.289166
Resident licence, male caribou	-5.16558	0.196337		-0.445474				-0.0637713		-0.40442	0.225805	-0.0646911		24.6629	2.91e-06	0.302982
Resident licence, male caribou	-5.12114	0.250099	-0.0413804	-0.438078				-0.0369544		-0.415324	0.229175			24.8833	2.61e-06	0.302747
Resident licence, male caribou	-5.15702			-0.827028	0.238002							-0.102806		24.8834	2.61e-06	0.2817
Resident licence, male caribou	-5.18579	0.198792		-0.459376						-0.391355	0.219365	-0.0683259	0.0365161	24.8977	2.59e-06	0.302731
Resident licence, male caribou	-5.16037	0.269914	-0.0351532	-0.889702	0.248218							-0.080737	0.0226935	24.9018	2.59e-06	0.302727
Resident licence, male caribou	-5.08613	0.264141	-0.0243713	-0.88889	0.288179			0.165625	-0.125615	-0.0759407		-0.0455671		24.9294	2.55e-06	0.316386
Resident licence, male caribou	-5.14026	0.263851	-0.0353096	-0.893761	0.251277			0.0108186				-0.0669509		25.0681	2.38e-06	0.30255
Resident licence, male caribou	-5.12347	0.249998	-0.0423111	-0.446151						-0.408994	0.225917		0.0115477	25.0859	2.36e-06	0.302531
Resident licence, male caribou	-5.09623	0.232569		-0.888532	0.291106			0.172418	-0.130521	-0.0736645		-0.036214	-0.0115955	25.1913	2.24e-06	0.316112
Resident licence, male caribou	-5.06229	0.257714	-0.0221509	-0.890544	0.295199			0.186946	-0.130791	-0.0777162			-0.0250699	25.22	2.21e-06	0.316082
Resident licence, male caribou	-5.15291			-0.412419						-0.418447	0.220474	-0.0758278		25.3385	2.08e-06	0.28829
Resident licence, male caribou	-5.19457	0.227217		-0.886699	0.249567			0.00354395				-0.0755753	0.0221759	25.5379	1.88e-06	0.302049
Resident licence, male caribou	-5.17487	0.204139		-0.432728				-0.042376		-0.412745	0.228373		0.0151274	25.6925	1.74e-06	0.301883
Resident licence, male caribou	-5.11687			-0.801294	0.272401			0.182704	-0.0900794	-0.12911				25.86	1.6e-06	0.294748
Resident licence, male caribou	-5.17161	0.254795	-0.0400527	-0.846232	0.249894					-0.12732		-0.0629269	0.0127637	26.0686	1.44e-06	0.308372
Resident licence, male caribou	-5.16169	0.252126	-0.0399976	-0.846019	0.251367			-0.00517381		-0.128742		-0.0572131		26.1219	1.4e-06	0.308316
Resident licence, male caribou	-5.13686	0.263511	-0.0319226	-0.891683	0.257276			0.031534					-0.00501555	26.2872	1.29e-06	0.301248
Resident licence, male caribou	-5.10754			-0.827026	0.25152								-0.0590416	26.3956	1.23e-06	0.280037
Resident licence, male caribou	-5.14783			-0.832454	0.246532			0.0895317						26.4258	1.21e-06	0.280004
Resident licence, male caribou	-5.29947			-0.697006	0.200581			0.00373974		-0.364966	0.170062	-0.0455525	-0.0406076	26.5071	1.16e-06	0.307908
Resident licence, male caribou	-5.12296			-0.39357						-0.435263	0.226512		-0.0330611	26.5095	1.16e-06	0.287014
Resident licence, male caribou	-5.05134	0.269996	-0.0200684	-0.921446	0.294616			0.20303	-0.146835			-0.0434998	-0.0103918	26.5601	1.13e-06	0.31468
Resident licence, male caribou	-5.21234	0.207691		-0.839759	0.250216			-0.0105704		-0.125409		-0.0611729	0.0140715	26.883	9.6e-07	0.30751
Resident licence, male caribou	-5.15492	0.250163	-0.0374873	-0.842623	0.256405			0.0124523		-0.13261			-0.00884685	26.9723	9.18e-07	0.307416
Resident licence, male caribou	-5.15178			-0.39089				0.00514122		-0.433752	0.225332			26.9914	9.1e-07	0.286489
Resident licence, male caribou	-5.19879			-0.732299	0.232394			0.162859	-0.107589	-0.330124	0.176351	-0.0199896	-0.0713402	27.0841	8.68e-07	0.31413
Resident licence, male caribou	-5.0919	0.217005		-0.44164				0.048546	-0.0820486	-0.38129	0.238564	-0.0584898		27.4359	7.28e-07	0.306925
Resident licence, male caribou	-5.06032	0.256197	-0.0302695	-0.434164				0.0700867	-0.0801513	-0.39139	0.241368			27.8712	5.86e-07	0.306463
Resident licence, male caribou	-4.99263			-0.873523	0.290484			0.261089	-0.132469				-0.0825872	27.99	5.52e-07	0.292447
Resident licence, male caribou	-5.09027	0.221363		-0.430459				0.0706625	-0.0837842	-0.389117	0.241398		0.00424968	28.345	4.62e-07	0.305961
Resident licence, male caribou	-5.16115			-0.781209	0.247007					-0.162122		-0.0598383	-0.0360121	28.4639	4.36e-07	0.291934
Resident licence, male caribou	-5.18672			-0.782469	0.24256			0.0311328		-0.157802		-0.0726952		28.7837	3.71e-07	0.291588
Resident licence, male caribou	-5.13923			-0.788593	0.253121			0.0529855		-0.162856			-0.0556344	28.7846	3.71e-07	0.291587
Resident licence, male caribou	-5.07341			-0.856197	0.271863			0.217929	-0.116036			-0.0764922		29.4487	2.66e-07	0.290868
Resident licence, male caribou	-5.04741			-0.824553	0.283399			0.196983	-0.102352	-0.122548			-0.0750679	29.8553	2.17e-07	0.297426
Resident licence, male caribou	-5.12275	0.250144	-0.0446233	-0.451301				-0.0594805		-0.405611	0.226114	-0.0690306		30.0943	1.93e-07	0.304102
Resident licence, male caribou	-5.14136	0.253938	-0.0456751	-0.464791						-0.393287	0.22003	-0.073276	0.0348671	30.2773	1.76e-07	0.303907
Resident licence, male caribou	-5.20642	0.207707		-0.448137				-0.0723523		-0.398704	0.223804	-0.0876277	0.043449	30.4816	1.59e-07	0.303689
Resident licence, male caribou	-5.15224			-0.839065	0.239935			0.0597213				-0.0894422		30.7294	1.4e-07	0.282399
Resident licence, male caribou	-5.13305			-0.832475	0.242177							-0.0868522	-0.0295812	31.0333	1.21e-07	0.282066
Resident licence, male caribou	-5.12137			-0.808246	0.267233			0.157995	-0.0874435	-0.124367		-0.0660217		31.1907	1.11e-07	0.29599
Resident licence, male caribou	-5.13293	0.252776	-0.0407042	-0.437627				-0.0374291		-0.414597	0.228919		0.0122243	31.3039	1.05e-07	0.302813
Resident licence, male caribou	-5.07584	0.26132	-0.0241971	-0.890507	0.289989			0.169862	-0.127137	-0.0760552		-0.0393279	-0.0110242	31.3704	1.02e-07	0.31643
Resident licence, male caribou	-5.10173			-0.847235	0.252833			0.0881555					-0.0579489	31.3773	1.01e-07	0.281688
Resident licence, male caribou	-5.15921	0.269316	-0.0352808	-0.890762	0.248418			0.00582709				-0.0792759	0.0220731	31.3792	1.01e-07	0.302733
Resident licence, male caribou	-5.15762			-0.407924				-0.0230494		-0.421638	0.222032	-0.0813396		31.7263	8.52e-08	0.288394
Resident licence, male caribou	-5.14335			-0.412188						-0.419734	0.221092	-0.0704765	-0.0106166	31.7783	8.31e-08	0.288337
Resident licence, male caribou	-5.10503			-0.387385				0.0778836	-0.0509874	-0.419374	0.232575			31.9459	7.64e-08	0.288155
Resident licence, male caribou	-5.1733	0.255545	-0.0398962	-0.84456	0.249676			-0.00807306		-0.127767		-0.0649072	0.0135857	32.5409	5.67e-08	0.308384
Resident licence, male caribou	-5.12219			-0.39456				0.00390228		-0.434503	0.226168		-0.0330037	32.9895	4.53e-08	0.287018
Resident licence, male caribou	-5.06347	0.256773	-0.0337752	-0.446228				0.0460452	-0.0774748	-0.383137	0.238131	-0.0623015		33.3227	3.84e-08	0.307556
Resident licence, male caribou	-5.12194	0.223828		-0.443747				0.0383762	-0.0786155	-0.378358	0.236536	-0.0737986	0.0288356	33.6346	3.28e-08	0.307226
Resident licence, male caribou	-5.00737			-0.872581	0.285444			0.24453	-0.128612			-0.0359523	-0.0697937	34.1887	2.49e-08	0.292755
Resident licence, male caribou	-5.06308	0.256771	-0.0301611	-0.43409				0.0696853	-0.079906	-0.391302	0.241257		0.00268921	34.3514	2.29e-08	0.306466
Resident licence, male caribou	-5.15484			-0.790224	0.247929			0.0371118		-0.158903		-0.0504627	-0.0386795	34.7071	1.92e-08	0.292194
Resident licence, male caribou	-5.16297	0.259882	-0.0435332	-0.453897				-0.067952		-0.400146	0.22426	-0.0910588	0.0416008	35.9671	1.02e-08	0.304751
Resident licence, male caribou	-5.05863			-0.824606	0.279712			0.184526	-0.0996577	-0.121445		-0.0282489	-0.0650549	36.1654	9.26e-09	0.297612
Resident licence, male caribou	-4.85505	0.211391		-0.498117										36.408	8.2e-09	0.261647
Resident licence, male caribou	-5.12391			-0.846514	0.245029			0.0652577				-0.0697495	-0.0344589	36.766	6.86e-09	0.282889
Resident licence, male caribou	-5.11304			-0.403797				0.0471496	-0.0482965	-0.408409	0.229004	-0.0776957		36.8414	6.61e-09	0.289881
Resident licence, male caribou	-4.87938	0.192541		-0.455153						-0.123879				37.5785	4.57e-09	0.26762
Resident licence, male caribou	-5.06035			-0.391652				0.0847295	-0.0571935	-0.418708	0.23478		-0.0437391	37.6013	4.52e-09	0.289055
Resident licence, male caribou	-5.14912			-0.408116				-0.0216491		-0.422674	0.222545	-0.0762616	-0.0092141	38.1774	3.39e-09	0.288428
Resident licence, male caribou	-5.09322	0.263299	-0.033572	-0.448274				0.0359388	-0.0741596	-0.380213	0.236146	-0.07752	0.0284183	39.5291	1.72e-09	0.307849
Resident licence, male caribou	-4.86638	0.200463		-0.519917								-0.0981293		39.9663	1.38e-09	0.264941
Resident licence, male caribou	-4.88751	0.184717		-0.477851						-0.115551		-0.0854155		41.8863	5.3e-10	0.270052
Resident licence, male caribou	-4.81835	0.257025	-0.0373108	-0.501815										42.158	4.63e-10	0.262474
Resident licence, male caribou	-4.87813	0.218089		-0.497792									0.0245496	42.6395	3.64e-10	0.261931
Resident licence, male caribou	-4.85205	0.206857		-0.504067				0.0330136						42.6868	3.55e-10	0.261877
Resident licence, male caribou	-5.08903			-0.403576				0.0554095	-0.0519257	-0.409746	0.230714	-0.0654887	-0.0223421	43.1437	2.83e-10	0.290077
Resident licence, male caribou	-4.84158	0.240272	-0.0386968	-0.458739						-0.124697				43.2674	2.66e-10	0.268509
Resident licence, male caribou	-4.89884	0.198399		-0.454973						-0.123151			0.020871	43.8796	1.96e-10	0.267824
Resident licence, male caribou	-4.87731	0.190087		-0.459562				0.0202318		-0.122914				43.9854	1.86e-10	0.267705
Resident licence, male caribou	-4.8816			-0.401045						-0.155803				44.4841	1.45e-10	0.252472
Resident licence, male caribou	-4.93215	0.21609		-0.525393								-0.130326	0.0666002	44.8437	1.21e-10	0.266744
Resident licence, male caribou	-4.82385	0.253458	-0.0439445	-0.525105								-0.103426		45.4323	9e-11	0.266084
Resident licence, male caribou	-4.77923	0.217975		-0.488597				0.12952	-0.0731009					45.8747	7.22e-11	0.265587
Resident licence, male caribou	-4.86641	0.200462		-0.519645				-0.000436997				-0.0982287		46.4494	5.41e-11	0.264941
Resident licence, male caribou	-4.85212			-0.453468										46.7392	4.68e-11	0.242417
Resident licence, male caribou	-4.94437	0.199169		-0.484332						-0.110989		-0.114261	0.0583848	47.1519	3.81e-11	0.27141
Resident licence, male caribou	-4.84452	0.239055	-0.0446304	-0.483105						-0.116091		-0.090917		47.3161	3.51e-11	0.271227
Resident licence, male caribou	-4.89135			-0.434312						-0.14238		-0.108739		47.4923	3.21e-11	0.256434
Resident licence, male caribou	-4.8666			-0.485997								-0.129235		48.1834	2.28e-11	0.248232
Resident licence, male caribou	-4.88865	0.185695		-0.476389				-0.00928703		-0.115933		-0.0873648		48.3545	2.09e-11	0.270069
Resident licence, male caribou	-4.81345	0.253753	-0.0388668	-0.508852				0.0375417						48.3778	2.06e-11	0.262771
Resident licence, male caribou	-4.84021	0.261574	-0.0360903	-0.501448									0.0219752	48.4397	2e-11	0.262701
Resident licence, male caribou	-4.87472	0.213538		-0.503555				0.0321641					0.0240269	48.9287	1.57e-11	0.262149
Resident licence, male caribou	-4.82598	0.200526		-0.457499				0.0855016	-0.0472538	-0.101601				49.2397	1.34e-11	0.26908
Resident licence, male caribou	-4.85945	0.244092	-0.0376516	-0.458535						-0.124026			0.0180649	49.6143	1.11e-11	0.268661
Resident licence, male caribou	-4.83799	0.238545	-0.0397805	-0.464379				0.0250594		-0.123507				49.6339	1.1e-11	0.268639
Resident licence, male caribou	-4.79644	0.212124		-0.504193				0.0929045	-0.0693826			-0.092373		49.964	9.34e-12	0.26827
Resident licence, male caribou	-4.87459			-0.418406				0.0644853		-0.149985				50.1588	8.47e-12	0.253396
Resident licence, male caribou	-4.89664	0.195968		-0.459235				0.0196811		-0.122271			0.0206551	50.2906	7.93e-12	0.267905
Resident licence, male caribou	-4.88949	0.267419	-0.0427389	-0.530477								-0.135274	0.065279	50.3691	7.63e-12	0.267817
Resident licence, male caribou	-4.85685			-0.403921						-0.155302			-0.0264521	50.6568	6.61e-12	0.252827
Resident licence, male caribou	-4.93514	0.218059		-0.523644				-0.0143278				-0.13403	0.0679601	51.2918	4.81e-12	0.266783
Resident licence, male caribou	-5.29692	0.236567				-0.549226	0.22613			-0.476064	0.168789			51.3594	4.65e-12	0.266707
Resident licence, male caribou	-4.84378			-0.472814				0.089043						51.6591	4e-12	0.244226
Resident licence, male caribou	-4.75279	0.25378	-0.0298948	-0.492854				0.129055	-0.0697325					51.8908	3.56e-12	0.266111
Resident licence, male caribou	-4.82325	0.25314	-0.0440812	-0.525467				0.00385052				-0.102642		51.9128	3.53e-12	0.266086
Resident licence, male caribou	-4.79506	0.2221		-0.488605				0.127501	-0.0718498				0.0154619	52.26	2.96e-12	0.265697
Resident licence, male caribou	-4.90106	0.251805	-0.0434798	-0.489417						-0.11157		-0.119288	0.0569221	52.6395	2.45e-12	0.272518
Resident licence, male caribou	-4.82553			-0.455884									-0.0284228	52.8627	2.19e-12	0.242834
Resident licence, male caribou	-4.94893	0.20186		-0.481132				-0.0213231		-0.111648		-0.119817	0.0603902	53.558	1.55e-12	0.271496
Resident licence, male caribou	-4.83924	0.196096		-0.473886				0.0537533	-0.0452182	-0.0955209		-0.0853421		53.7106	1.43e-12	0.271325
Resident licence, male caribou	-5.33036	0.235741				-0.505267	0.227318	-0.14386		-0.503096	0.181911			53.773	1.39e-12	0.271256
Resident licence, male caribou	-4.84527	0.239393	-0.0444732	-0.482307				-0.0049028		-0.116303		-0.0919103		53.7951	1.38e-12	0.271231
Resident licence, male caribou	-4.88757			-0.44012				0.0292765		-0.140709		-0.101906		53.8239	1.36e-12	0.256606
Resident licence, male caribou	-4.90169			-0.434721						-0.142084		-0.114167	0.0105884	53.9332	1.28e-12	0.256482
Resident licence, male caribou	-4.86097			-0.493646				0.0471504				-0.118043		54.2697	1.09e-12	0.248688
Resident licence, male caribou	-4.88249			-0.486489								-0.137454	0.0161555	54.567	9.35e-13	0.248346
Resident licence, male caribou	-4.83469	0.258205	-0.0376199	-0.508266				0.0365306					0.0211967	54.6735	8.87e-13	0.262982
Resident licence, male caribou	-4.79734	0.240835	-0.0338166	-0.46174				0.0837367	-0.0427483	-0.103938				55.1274	7.07e-13	0.269745
Resident licence, male caribou	-5.32163	0.236157				-0.549279	0.250539			-0.492013	0.171756	0.102582		55.1767	6.89e-13	0.26969
Resident licence, male caribou	-4.85971	0.225937		-0.508806				0.0738678	-0.0635487			-0.122637	0.0567366	55.332	6.38e-13	0.269517
Resident licence, male caribou	-4.84219	0.204763		-0.457351				0.083425	-0.0459891	-0.1017			0.0158473	55.6194	5.53e-13	0.269196
Resident licence, male caribou	-4.76551	0.254317	-0.0356286	-0.50968				0.0913911	-0.0653601			-0.0964627		55.7848	5.09e-13	0.269011
Resident licence, male caribou	-4.85555	0.242351	-0.0387332	-0.463994				0.0243655		-0.12293			0.0176619	55.9871	4.6e-13	0.268785
Resident licence, male caribou	-5.2389	0.264664				-0.503531	0.219209	-0.0225297	-0.0889971	-0.469659	0.191124			56.0981	4.35e-13	0.275874
Resident licence, male caribou	-4.78874			-0.460266				0.163814	-0.0542627					56.2577	4.02e-13	0.246401
Resident licence, male caribou	-4.85092			-0.420879				0.0635935		-0.1496			-0.0254015	56.3558	3.82e-13	0.253722
Resident licence, male caribou	-4.85248			-0.416863				0.0940291	-0.0201238	-0.141537				56.4071	3.73e-13	0.253664
Resident licence, male caribou	-5.35063	0.256882				-0.559512	0.228601			-0.471146	0.166559		0.0557497	56.5367	3.49e-13	0.26817
Resident licence, male caribou	-4.89195	0.268459	-0.0424165	-0.529181				-0.0102138				-0.137863	0.0662792	56.8345	3.01e-13	0.267837
Resident licence, male caribou	-5.27739	0.263272	-0.0222893			-0.549488	0.227777			-0.47888	0.169725			57.5664	2.09e-13	0.267017
Resident licence, male caribou	-4.81877			-0.474977				0.0880761					-0.0268598	57.8206	1.84e-13	0.244598
Resident licence, male caribou	-4.76721	0.256751	-0.0292375	-0.493066				0.127402	-0.0687759				0.0135921	58.2977	1.45e-13	0.266197
Resident licence, male caribou	-5.34226	0.23598				-0.512089	0.244514	-0.12078		-0.509421	0.181705	0.0736672		58.983	1.03e-13	0.272673
Resident licence, male caribou	-5.38246	0.255796				-0.516613	0.229838	-0.142082		-0.497652	0.179573		0.0542526	59.0207	1.01e-13	0.272631
Resident licence, male caribou	-4.90527	0.253328	-0.0429389	-0.486739				-0.0170548		-0.112082		-0.123662	0.0585886	59.0735	9.82e-14	0.272573
Resident licence, male caribou	-4.89932	0.209616		-0.478571				0.0359923	-0.0400822	-0.0940072		-0.114762	0.0545679	59.1672	9.37e-14	0.272468
Resident licence, male caribou	-4.81014			-0.481002				0.116742	-0.0495478			-0.113728		59.178	9.32e-14	0.250495
Resident licence, male caribou	-4.80677	0.242033	-0.0389194	-0.479326				0.0507499	-0.0400832	-0.0979332		-0.0896796		59.4062	8.32e-14	0.272202
Resident licence, male caribou	-5.16904	0.264625				-0.679288	0.282329			-0.275432				59.5538	7.73e-14	0.250064
Resident licence, male caribou	-5.31104	0.261901	-0.021726			-0.505517	0.228832	-0.143414		-0.505465	0.182749			59.9943	6.2e-14	0.271548
Resident licence, male caribou	-4.86783			-0.438449				0.055698	-0.0178764	-0.133016		-0.101151		60.1213	5.82e-14	0.256817
Resident licence, male caribou	-5.26926					-0.364132	0.191968			-0.532413	0.19141			60.2062	5.58e-14	0.249316
Resident licence, male caribou	-4.89623			-0.440232				0.0280404		-0.140416		-0.106693	0.00869812	60.2787	5.38e-14	0.256638
Resident licence, male caribou	-4.8741			-0.493756				0.0452942				-0.125177	0.0131124	60.6876	4.38e-14	0.248763
Resident licence, male caribou	-4.82854	0.267369	-0.0350544	-0.514149				0.0723655	-0.0597247			-0.126652	0.0561003	61.1756	3.43e-14	0.270231
Resident licence, male caribou	-5.34199	0.245102				-0.553991	0.248265			-0.487558	0.170368	0.0885269	0.0245924	61.4611	2.98e-14	0.269912
Resident licence, male caribou	-5.30487	0.258955	-0.0188379			-0.549848	0.251708			-0.494046	0.172479	0.101244		61.4631	2.97e-14	0.26991
Resident licence, male caribou	-5.25171	0.263947				-0.508907	0.234887	-0.00394569	-0.0869369	-0.476501	0.190816	0.0678059		61.5086	2.91e-14	0.277061
Resident licence, male caribou	-4.81196	0.243759	-0.0331518	-0.461544				0.0819057	-0.0417506	-0.103969			0.0137609	61.5325	2.87e-14	0.269832
Resident licence, male caribou	-5.2823	0.277521				-0.511279	0.221152	-0.028562	-0.0835427	-0.467923	0.188797		0.0397803	61.9364	2.35e-14	0.276588
Resident licence, male caribou	-4.75141			-0.462185				0.167466	-0.0581078				-0.0359286	62.1784	2.08e-14	0.247048
Resident licence, male caribou	-4.82161			-0.419342				0.0979494	-0.0235895	-0.139611			-0.0290621	62.5223	1.75e-14	0.254083
Resident licence, male caribou	-5.23124	0.276469	-0.0100983			-0.503663	0.219967	-0.0240174	-0.0875662	-0.471139	0.191366			62.525	1.75e-14	0.275937
Resident licence, male caribou	-5.30055					-0.321671	0.192291	-0.139792		-0.556609	0.203751			62.7751	1.54e-14	0.253795
Resident licence, male caribou	-5.33224	0.279948	-0.0195691			-0.559799	0.230109			-0.473688	0.167399		0.0543625	62.8086	1.52e-14	0.268406
Resident licence, male caribou	-5.19027	0.265259				-0.682877	0.306529			-0.286015		0.0935527		63.8133	9.18e-15	0.25261
Resident licence, male caribou	-5.18676	0.26471				-0.655619	0.287582	-0.0999486		-0.283355				64.0511	8.15e-15	0.252338
Resident licence, male caribou	-5.29293					-0.362717	0.214497			-0.548632	0.194977	0.0998388		64.1492	7.76e-15	0.252226
Resident licence, male caribou	-5.23234	0.287725				-0.689867	0.285016			-0.272958			0.0631517	64.353	7.01e-15	0.251993
Resident licence, male caribou	-4.86644	0.25465	-0.0382557	-0.483865				0.033095	-0.0352014	-0.0963381		-0.118931	0.0537462	64.8917	5.36e-15	0.273312
Resident licence, male caribou	-5.37359	0.249298				-0.51766	0.240853	-0.126775		-0.503728	0.180189	0.050911	0.0364298	65.0375	4.98e-15	0.27315
Resident licence, male caribou	-5.07972									-0.581708	0.244089			65.2542	4.47e-15	0.228351
Resident licence, male caribou	-5.32489	0.259415	-0.019352			-0.512425	0.245601	-0.120882		-0.511346	0.182441	0.072212		65.2588	4.46e-15	0.272904
Resident licence, male caribou	-5.3642	0.27869	-0.0192992			-0.516837	0.231241	-0.141811		-0.499849	0.180344		0.0530052	65.2987	4.37e-15	0.272859
Resident licence, male caribou	-4.81261			-0.481175				0.11607	-0.0492462			-0.114919	0.00214972	65.6594	3.65e-15	0.250497
Resident licence, male caribou	-5.11818							-0.163017		-0.599408	0.251819			65.7609	3.47e-15	0.23537
Resident licence, male caribou	-5.15461	0.283593	-0.0156898			-0.679946	0.28367			-0.27637				65.8992	3.24e-15	0.250222
Resident licence, male caribou	-5.08124	0.185179				-0.177972				-0.52365	0.225292			66.3849	2.54e-15	0.24219
Resident licence, male caribou	-4.87375			-0.438611				0.0539503	-0.0171696	-0.133145		-0.104023	0.00515366	66.5949	2.29e-15	0.256828
Resident licence, male caribou	-5.12155	0.122638						-0.199983		-0.595849	0.256341			66.6037	2.28e-15	0.241936
Resident licence, male caribou	-5.26805					-0.364326	0.191999			-0.532409	0.19141		-0.00132746	66.6885	2.18e-15	0.249317
Resident licence, male caribou	-5.32509	0.266581	-0.0180456			-0.554408	0.249499			-0.489686	0.171106	0.0877689	0.0235534	67.7643	1.27e-15	0.270113
Resident licence, male caribou	-5.27132	0.270541				-0.511916	0.233003	-0.0103809	-0.0845705	-0.474326	0.189692	0.0554737	0.0201085	67.8649	1.21e-15	0.277201
Resident licence, male caribou	-5.11144	0.287446				-0.660155	0.286611	-0.00294419	-0.0695728	-0.248828				67.9544	1.16e-15	0.255281
Resident licence, male caribou	-5.24577	0.273076	-0.00776922			-0.509065	0.235368	-0.00532965	-0.085821	-0.477572	0.190996	0.067193		67.9585	1.16e-15	0.277098
Resident licence, male caribou	-5.03308	0.14855						-0.0727561	-0.0962741	-0.563268	0.267038			68.0654	1.1e-15	0.247734
Resident licence, male caribou	-5.3117					-0.327042	0.207963	-0.117052		-0.563446	0.204058	0.0706031		68.0893	1.08e-15	0.255128
Resident licence, male caribou	-5.25057					-0.308666	0.184683	-0.0764675	-0.044722	-0.541835	0.209314			68.1248	1.06e-15	0.255087
Resident licence, male caribou	-5.2751	0.288001	-0.00903205			-0.511427	0.221861	-0.0298798	-0.082314	-0.469255	0.189027		0.0394233	68.3747	9.39e-16	0.276638
Resident licence, male caribou	-5.07654	0.0904092								-0.575931	0.246447			68.5672	8.53e-16	0.232082
Resident licence, male caribou	-5.11485	0.183753				-0.132362		-0.147759		-0.55301	0.239201			68.772	7.7e-16	0.246921
Resident licence, male caribou	-5.24951	0.287824				-0.666908	0.290242	-0.0989937		-0.280376			0.0626552	68.8765	7.3e-16	0.254231
Resident licence, male caribou	-5.0169	0.218498				-0.150602		0.000706862	-0.107698	-0.513468	0.25069			69.0892	6.57e-16	0.253988
Resident licence, male caribou	-5.19977	0.265476				-0.663594	0.305903	-0.0774228		-0.289845		0.0757593		69.1769	6.29e-16	0.253888
Resident licence, male caribou	-5.29694					-0.322166	0.192396	-0.140016		-0.556679	0.203776		-0.00404058	69.2506	6.06e-16	0.253804
Resident licence, male caribou	-5.053							-0.0636589	-0.069743	-0.575706	0.258849			69.4293	5.54e-16	0.238654
Resident licence, male caribou	-5.0833					-0.0771259				-0.562336	0.233606			69.4294	5.54e-16	0.231069
Resident licence, male caribou	-5.22349	0.278931				-0.688616	0.302435			-0.281944		0.0716244	0.0380376	69.8182	4.56e-16	0.253156
Resident licence, male caribou	-5.25961					-0.368092	0.221088			-0.5528	0.195807	0.124262	-0.0428817	69.9619	4.25e-16	0.252992
Resident licence, male caribou	-5.17845	0.280761	-0.0127102			-0.683596	0.307458			-0.286605		0.0926967		70.2061	3.76e-16	0.252713
Resident licence, male caribou	-5.17258	0.28324	-0.0152804			-0.656233	0.28883	-0.0996691		-0.28412				70.4041	3.4e-16	0.252486
Resident licence, male caribou	-5.08216									-0.589268	0.246341	0.0552398		70.7424	2.87e-16	0.229524
Resident licence, male caribou	-5.21972	0.303176	-0.0129487			-0.690509	0.286185			-0.273765			0.0623351	70.7429	2.87e-16	0.252099
Resident licence, male caribou	-5.35645	0.27135	-0.0183839			-0.51816	0.242097	-0.126626		-0.505842	0.18095	0.0500381	0.0355216	71.3343	2.14e-16	0.273357
Resident licence, male caribou	-5.08808									-0.581478	0.243929		0.00887548	71.7017	1.78e-16	0.228393
Resident licence, male caribou	-5.11604					-0.0339879		-0.145401		-0.589224	0.246692			71.8587	1.64e-16	0.235821
Resident licence, male caribou	-5.12505	0.200926				-0.183865				-0.520084	0.224304		0.0467176	71.9615	1.56e-16	0.24324
Resident licence, male caribou	-5.11777							-0.160096		-0.599905	0.251943	0.00657927		72.2318	1.36e-16	0.235385
Resident licence, male caribou	-5.12031							-0.162809		-0.599311	0.251774		0.00230689	72.2417	1.36e-16	0.235373
Resident licence, male caribou	-5.11704					-0.483725	0.248149			-0.310722				72.553	1.16e-16	0.227388
Resident licence, male caribou	-5.15186	0.131301						-0.199833		-0.594457	0.256089		0.032408	72.6384	1.11e-16	0.242456
Resident licence, male caribou	-5.06644	0.203024	-0.015439			-0.176242				-0.525926	0.2259			72.7381	1.06e-16	0.24234
Resident licence, male caribou	-5.08165	0.184042				-0.171656				-0.527294	0.226766	0.0157243		72.7999	1.03e-16	0.242269
Resident licence, male caribou	-5.09942	0.15038	-0.0226961					-0.198569		-0.597563	0.256749			72.8012	1.03e-16	0.242267
Resident licence, male caribou	-5.12037	0.12406						-0.191705		-0.597326	0.256777	0.0195598		72.9787	9.39e-17	0.242062
Resident licence, male caribou	-5.12582	0.287247				-0.666773	0.303516	0.0149718	-0.0672452	-0.256051		0.070769		73.2564	8.18e-17	0.256625
Resident licence, male caribou	-5.17084	0.304485				-0.668563	0.288558	-0.0114775	-0.0627077	-0.25014			0.0522274	73.3153	7.94e-17	0.256558
Resident licence, male caribou	-5.07933	0.100271								-0.585653	0.249692	0.0722806		73.3768	7.7e-17	0.234045
Resident licence, male caribou	-5.26308					-0.313878	0.199864	-0.0569681	-0.0430067	-0.549148	0.209468	0.0679933		73.5279	7.14e-17	0.256316
Resident licence, male caribou	-5.2842					-0.332592	0.213571	-0.112023		-0.566164	0.204305	0.091838	-0.0343019	74.1475	5.24e-17	0.255611
Resident licence, male caribou	-5.2654	0.279453	-0.00760705			-0.512075	0.233491	-0.0117152	-0.0834977	-0.475384	0.189873	0.0549112	0.0200015	74.3161	4.81e-17	0.277237
Resident licence, male caribou	-5.03122	0.150229						-0.0616932	-0.096846	-0.565111	0.26774	0.024081		74.3862	4.65e-17	0.247921
Resident licence, male caribou	-5.05183	0.152822						-0.0754012	-0.0941224	-0.563238	0.266542		0.0180317	74.4135	4.58e-17	0.24789
Resident licence, male caribou	-5.10671	0.294509	-0.00601531			-0.660328	0.287079	-0.00390308	-0.0687197	-0.249474				74.4175	4.58e-17	0.255304
Resident licence, male caribou	-5.15646	0.198954				-0.139015		-0.145944		-0.548992	0.238105		0.0447019	74.426	4.56e-17	0.247875
Resident licence, male caribou	-5.02313	0.162279	-0.0114777					-0.0736181	-0.0948547	-0.564444	0.267115			74.4757	4.44e-17	0.247818
Resident licence, male caribou	-5.23371					-0.309877	0.184703	-0.0732532	-0.0476423	-0.5411	0.209781		-0.0153558	74.5045	4.38e-17	0.255205
Resident licence, male caribou	-5.10676	0.0991829								-0.574732	0.246138		0.0323334	74.6022	4.17e-17	0.232608
Resident licence, male caribou	-5.05091	0.12321	-0.0267436							-0.57835	0.24699			74.6493	4.07e-17	0.232553
Resident licence, male caribou	-5.24122	0.282219				-0.669069	0.30087	-0.0852454		-0.285243		0.0468219	0.046275	74.9643	3.48e-17	0.254681
Resident licence, male caribou	-5.09961	0.202189	-0.0158153			-0.13065		-0.147731		-0.555103	0.239776			75.1189	3.22e-17	0.247078
Resident licence, male caribou	-5.1157	0.184798				-0.137311		-0.152538		-0.550638	0.238294	-0.0158486		75.1905	3.11e-17	0.246996
Resident licence, male caribou	-5.04753	0.227537				-0.154413		-0.00251389	-0.104396	-0.512116	0.249461		0.0297915	75.2133	3.07e-17	0.254397
Resident licence, male caribou	-5.23706	0.303078	-0.0127308			-0.66749	0.291346	-0.0988435		-0.281056			0.0619114	75.2696	2.99e-17	0.254333
Resident licence, male caribou	-5.01766	0.219556				-0.155391		-0.00419907	-0.107679	-0.510963	0.249721	-0.015607		75.5105	2.65e-17	0.254058
Resident licence, male caribou	-5.05096					-0.0347644		-0.0455767	-0.0698518	-0.565695	0.253936			75.5181	2.64e-17	0.239113
Resident licence, male caribou	-5.18763	0.281328	-0.012993			-0.664206	0.306807	-0.0774919		-0.290382		0.0748549		75.5661	2.58e-17	0.253995
Resident licence, male caribou	-5.01423	0.222069	-0.00311572			-0.150257		0.000287179	-0.107308	-0.513955	0.25076			75.5669	2.58e-17	0.253994
Resident licence, male caribou	-5.08403					-0.0674504				-0.568194	0.236032	0.0270875		75.7098	2.4e-17	0.231307
Resident licence, male caribou	-5.03914							-0.061862	-0.0718762	-0.575524	0.259387		-0.0129	75.8393	2.25e-17	0.238739
Resident licence, male caribou	-5.05232							-0.0594375	-0.0698905	-0.576365	0.259051	0.00894008		75.89	2.19e-17	0.23868
Resident licence, male caribou	-5.08678					-0.0768334				-0.562302	0.233583		0.0037059	75.9065	2.17e-17	0.231076
Resident licence, male caribou	-5.21219	0.29296	-0.011654			-0.689261	0.303366			-0.282562		0.0710875	0.0374784	76.2256	1.85e-17	0.253242
Resident licence, male caribou	-5.13569					-0.4854	0.269464			-0.320554		0.0865788		77.1202	1.18e-17	0.229648
Resident licence, male caribou	-5.06977									-0.590525	0.246832	0.0617932	-0.0134102	77.1581	1.16e-17	0.229603
Resident licence, male caribou	-5.1328					-0.460642	0.252136	-0.0938143		-0.316907				77.2738	1.1e-17	0.229467
Resident licence, male caribou	-5.11627					-0.0351742		-0.146813		-0.588603	0.246443	-0.00442445		78.3369	6.45e-18	0.235826
Resident licence, male caribou	-5.11702					-0.0339316		-0.145341		-0.589194	0.246679		0.00105842	78.3414	6.43e-18	0.235821
Resident licence, male caribou	-5.11225	0.214701	-0.0122184			-0.1824				-0.521976	0.224813		0.045555	78.3638	6.36e-18	0.243333
Resident licence, male caribou	-5.12936	0.203622				-0.189873				-0.516609	0.222923	-0.0135826	0.0517251	78.4051	6.23e-18	0.243285
Resident licence, male caribou	-5.11787							-0.160107		-0.599901	0.251944	0.00652847	0.000102628	78.7149	5.34e-18	0.235385
Resident licence, male caribou	-5.12999	0.156433	-0.0208859					-0.198624		-0.596119	0.256489		0.0307815	78.8811	4.91e-18	0.242734
Resident licence, male caribou	-5.11541					-0.483992	0.248187			-0.310715			-0.00178607	79.0346	4.55e-18	0.22739
Resident licence, male caribou	-5.15075	0.131229						-0.198598		-0.594754	0.256171	0.00299603	0.0313915	79.1194	4.36e-18	0.242458
Resident licence, male caribou	-5.06745	0.201236	-0.0147778			-0.170551				-0.529157	0.22722	0.0143998		79.1644	4.26e-18	0.242406
Resident licence, male caribou	-5.09947	0.150295	-0.021616					-0.19155		-0.598775	0.25711	0.0168568		79.2049	4.18e-18	0.242359
Resident licence, male caribou	-5.21536					-0.319528	0.206513	-0.0385167	-0.0513343	-0.550208	0.210972	0.097241	-0.0483231	79.2088	4.17e-18	0.257228
Resident licence, male caribou	-5.16102	0.298588				-0.670455	0.299671	0.00389233	-0.0634058	-0.254667		0.049402	0.0347719	79.3559	3.87e-18	0.257061
Resident licence, male caribou	-5.05877	0.126085	-0.0213378							-0.587257	0.250018	0.0694872		79.6083	3.41e-18	0.234339
Resident licence, male caribou	-5.12279	0.29176	-0.0038263			-0.666911	0.303769	0.0142535	-0.0666944	-0.256435		0.0705012		79.7313	3.21e-18	0.256634
Resident licence, male caribou	-5.16689	0.310118	-0.00482208			-0.668748	0.288963	-0.0122504	-0.0620475	-0.250654			0.0520621	79.7855	3.12e-18	0.256573
Resident licence, male caribou	-5.08705	0.10196								-0.58483	0.249453	0.0684568	0.00839695	79.8352	3.05e-18	0.234074
Resident licence, male caribou	-5.17815	0.209594				-0.158911		-0.162144		-0.538725	0.234306	-0.0558295	0.0651033	80.3017	2.41e-18	0.248574
Resident licence, male caribou	-4.94666	0.348069				-0.67891	0.267244	0.12692	-0.144946					80.6558	2.02e-18	0.233112
Resident licence, male caribou	-5.06842	0.319679				-0.68744	0.261378							80.6744	2e-18	0.217734
Resident licence, male caribou	-5.081	0.128864	-0.0246826							-0.57706	0.246674		0.0300766	80.7462	1.93e-18	0.233006
Resident licence, male caribou	-5.0228	0.161928	-0.00985447					-0.0631047	-0.095585	-0.566028	0.267766	0.0227079		80.8161	1.87e-18	0.247982
Resident licence, male caribou	-5.14292	0.213722	-0.0129646			-0.137472		-0.146025		-0.550825	0.238612		0.0435617	80.8182	1.86e-18	0.24798
Resident licence, male caribou	-5.0439	0.152554						-0.0662823	-0.0952966	-0.564618	0.267234	0.0178989	0.0117202	80.8236	1.86e-18	0.247974
Resident licence, male caribou	-5.04189	0.165515	-0.0107254					-0.0761449	-0.0928722	-0.564344	0.266636		0.0174145	80.8332	1.85e-18	0.247963
Resident licence, male caribou	-5.06621	0.235423				-0.169627		-0.0179898	-0.102484	-0.504557	0.246112	-0.04345	0.045889	81.3302	1.44e-18	0.254815
Resident licence, male caribou	-5.22968	0.296585	-0.0119024			-0.669636	0.30177	-0.0852913		-0.285788		0.0461985	0.045777	81.3688	1.42e-18	0.254771
Resident licence, male caribou	-5.09977	0.20423	-0.0166018			-0.135971		-0.152968		-0.552593	0.238806	-0.017415		81.5244	1.31e-18	0.247167
Resident licence, male caribou	-5.046	0.229395	-0.00164868			-0.154219		-0.00272876	-0.104203	-0.512382	0.249504		0.0296835	81.6948	1.2e-18	0.254399
Resident licence, male caribou	-5.03547					-0.0355747		-0.0430654	-0.0722359	-0.565265	0.254428		-0.0143623	81.9113	1.08e-18	0.239218
Resident licence, male caribou	-5.01431	0.224081	-0.00392531			-0.155081		-0.00485091	-0.107191	-0.511507	0.249784	-0.016029		81.985	1.04e-18	0.254068
Resident licence, male caribou	-5.05107					-0.0352866		-0.046229	-0.0698223	-0.565415	0.253815	-0.00195967		82.0003	1.03e-18	0.239114
Resident licence, male caribou	-5.07807					-0.0666958				-0.568997	0.236381	0.0305431	-0.00643846	82.1774	9.45e-19	0.231326
Resident licence, male caribou	-5.03013							-0.0515139	-0.0733389	-0.576897	0.260123	0.0198003	-0.0198884	82.2331	9.19e-19	0.238843
Resident licence, male caribou	-5.14398					-0.466903	0.268195	-0.0723312		-0.323345		0.0692513		82.6231	7.56e-19	0.230802
Resident licence, male caribou	-5.10523					-0.491262	0.275832			-0.323137		0.10903	-0.0386188	83.0588	6.08e-19	0.230289
Resident licence, male caribou	-5.10653					-0.456219	0.25013	-0.0615573	-0.0219871	-0.306711				83.4794	4.93e-19	0.229794
Resident licence, male caribou	-5.12968					-0.461106	0.252213	-0.093974		-0.316915			-0.00344392	83.7515	4.3e-19	0.229473
Resident licence, male caribou	-5.11647	0.217878	-0.0125278			-0.188675				-0.518374	0.223376	-0.0142924	0.0508014	84.8033	2.54e-19	0.243383
Resident licence, male caribou	-5.11925					-0.035487		-0.147202		-0.588262	0.246304	-0.00622414	0.00311201	84.8166	2.52e-19	0.23583
Resident licence, male caribou	-5.14206	0.344908				-0.700907	0.264546						0.0723828	84.9372	2.38e-19	0.220385
Resident licence, male caribou	-5.1298	0.156353	-0.0208391					-0.198352		-0.596212	0.256514	0.00070629	0.0305573	85.364	1.92e-19	0.242735
Resident licence, male caribou	-5.15813	0.302848	-0.00361662			-0.670597	0.299919	0.00321235	-0.0628954	-0.255027		0.049146	0.0347366	85.8317	1.52e-19	0.257069
Resident licence, male caribou	-5.06572	0.127225	-0.0210737							-0.58653	0.24981	0.0661876	0.00726268	86.0731	1.35e-19	0.234361
Resident licence, male caribou	-4.99893	0.363431				-0.686175	0.268365	0.119384	-0.138864				0.0468066	86.2381	1.24e-19	0.234168
Resident licence, male caribou	-5.07818	0.320732				-0.691494	0.273948					0.0468698		86.5801	1.05e-19	0.218424
Resident licence, male caribou	-5.07614	0.319703				-0.675568	0.263769	-0.0524244						86.6288	1.02e-19	0.218366
Resident licence, male caribou	-5.16361	0.226074	-0.0143184			-0.15754		-0.162495		-0.540569	0.234808	-0.0568214	0.0642372	86.6744	9.97e-20	0.2487
Resident licence, male caribou	-4.95222	0.348748				-0.68292	0.275959	0.137156	-0.1447			0.0366904		86.8097	9.32e-20	0.233498
Resident licence, male caribou	-4.95326	0.339139	0.0075614			-0.678754	0.266649	0.127606	-0.145653					87.1083	8.03e-20	0.233148
Resident licence, male caribou	-5.06403	0.325163	-0.00469265			-0.687597	0.26183							87.1452	7.88e-20	0.217748
Resident licence, male caribou	-5.03544	0.164145	-0.00977761					-0.0676624	-0.0940613	-0.565531	0.267267	0.0165645	0.0116257	87.2543	7.46e-20	0.248034
Resident licence, male caribou	-5.06342	0.23903	-0.00314994			-0.169361		-0.0184971	-0.102111	-0.505007	0.246174	-0.043761	0.0458001	87.8077	5.66e-20	0.254821
Resident licence, male caribou	-5.0321					-0.0336173		-0.0399645	-0.0727974	-0.566345	0.254987	0.00786715	-0.017035	88.3814	4.25e-20	0.239233
Resident licence, male caribou	-5.117					-0.473069	0.273831	-0.0674207		-0.325398		0.0901456	-0.0334751	88.7016	3.62e-20	0.231277
Resident licence, male caribou	-5.11981					-0.462485	0.265885	-0.0437504	-0.019888	-0.313756		0.0677259		88.8802	3.31e-20	0.231067
Resident licence, male caribou	-5.09656					-0.457121	0.250205	-0.0596363	-0.0236195	-0.305927			-0.00889442	89.9274	1.96e-20	0.229835
Resident licence, male caribou	-4.81385	0.200144				-0.224332				-0.237566				90.2442	1.67e-20	0.206203
Resident licence, male caribou	-5.1505	0.34523				-0.689337	0.267114	-0.053455					0.0727641	90.8636	1.23e-20	0.221048
Resident licence, male caribou	-5.141	0.344137				-0.701132	0.266507					0.00783228	0.0697361	91.4075	9.36e-21	0.2204
Resident licence, male caribou	-5.1405	0.346739	-0.00158558			-0.700975	0.264703						0.0722996	91.4188	9.3e-21	0.220387
Resident licence, male caribou	-5.00701	0.353026	0.008869			-0.685921	0.267612	0.120179	-0.139642				0.0471652	92.6792	4.95e-21	0.234217
Resident licence, male caribou	-4.99632	0.362366				-0.686877	0.270848	0.123134	-0.139324			0.0107723	0.0430125	92.699	4.9e-21	0.234194
Resident licence, male caribou	-5.08246	0.320557				-0.681102	0.273489	-0.0416238				0.0382473		92.7509	4.78e-21	0.218797
Resident licence, male caribou	-5.07492	0.324775	-0.00345087			-0.691626	0.274241					0.0466846		93.0565	4.1e-21	0.218432
Resident licence, male caribou	-5.07144	0.325608	-0.00504131			-0.675715	0.264266	-0.0525054						93.0977	4.02e-21	0.218383
Resident licence, male caribou	-4.96009	0.338137	0.0089634			-0.682729	0.275397	0.138225	-0.145558			0.0374415		93.2496	3.72e-21	0.233549
Resident licence, male caribou	-4.78437									-0.282581				94.2474	2.26e-21	0.185337
Resident licence, male caribou	-5.07943					-0.468623	0.272063	-0.0285263	-0.0264624	-0.313015		0.0923595	-0.0403612	94.7995	1.72e-21	0.23173
Resident licence, male caribou	-4.8092					-0.118784				-0.272246				94.8475	1.68e-21	0.192632
Resident licence, male caribou	-4.863	0.217294				-0.230572				-0.235184			0.0511594	95.6463	1.12e-21	0.207514
Resident licence, male caribou	-4.82256	0.198742				-0.201536		-0.073937		-0.243358				95.7149	1.09e-21	0.207431
Resident licence, male caribou	-4.81675	0.202367				-0.236544				-0.234624		-0.0313621		96.447	7.53e-22	0.206543
Resident licence, male caribou	-4.80732	0.207616	-0.00644401			-0.223675				-0.23808				96.7045	6.62e-22	0.206231
Resident licence, male caribou	-4.80752							-0.129084		-0.288374				97.0595	5.54e-22	0.189897
Resident licence, male caribou	-5.15187	0.345978				-0.688685	0.265334	-0.055629				-0.00744864	0.0753321	97.3364	4.83e-22	0.221061
Resident licence, male caribou	-5.14848	0.34762	-0.00205726			-0.689423	0.267331	-0.0534944					0.0726467	97.3443	4.81e-22	0.221051
Resident licence, male caribou	-5.13959	0.345827	-0.00145868			-0.701198	0.266631					0.00775292	0.0696922	97.8893	3.66e-22	0.220402
Resident licence, male caribou	-4.7781	0.0762273								-0.274102				98.4928	2.71e-22	0.188119
Resident licence, male caribou	-4.7404	0.221239				-0.212842		0.0360626	-0.077844	-0.206135				98.9789	2.12e-22	0.211322
Resident licence, male caribou	-5.00452	0.351465	0.00922001			-0.686647	0.270241	0.124238	-0.140173			0.0115566	0.0431131	99.1368	1.96e-22	0.234247
Resident licence, male caribou	-5.07869	0.325282	-0.00399212			-0.68141	0.273839	-0.0416157				0.0379736		99.2251	1.88e-22	0.218808
Resident licence, male caribou	-4.80408	0.101912						-0.159632		-0.278213				99.6851	1.49e-22	0.194661
Resident licence, male caribou	-4.81828					-0.0967145		-0.0753671		-0.277382				100.262	1.12e-22	0.19395
Resident licence, male caribou	-4.78388									-0.284819		0.0322505		100.382	1.05e-22	0.185771
Resident licence, male caribou	-4.79715									-0.282947			0.013184	100.652	9.2e-23	0.185435
Resident licence, male caribou	-4.8969	0.232435				-0.263151				-0.226946		-0.0764488	0.0794521	100.847	8.34e-23	0.209066
Resident licence, male caribou	-4.87077	0.215693				-0.208409		-0.0723836		-0.240785			0.0503276	101.152	7.16e-23	0.208697
Resident licence, male caribou	-4.81094					-0.125637				-0.2706		-0.01981		101.219	6.93e-23	0.19277
Resident licence, male caribou	-4.81374					-0.118397				-0.272319			0.00476865	101.321	6.58e-23	0.192644
Resident licence, male caribou	-4.82903	0.201807				-0.216054		-0.0894906		-0.240131		-0.0496141		101.544	5.89e-23	0.208223
Resident licence, male caribou	-4.86	0.220357	-0.00271264			-0.230282				-0.235402			0.0508978	102.125	4.4e-23	0.207519
Resident licence, male caribou	-4.81554	0.206797	-0.00692004			-0.200804		-0.0740353		-0.243886				102.172	4.3e-23	0.207462
Resident licence, male caribou	-4.75945							-0.0631294	-0.0448014	-0.268035				102.393	3.85e-23	0.191319
Resident licence, male caribou	-4.80875	0.211606	-0.00794334			-0.235985				-0.235209		-0.0320736		102.896	3e-23	0.206585
Resident licence, male caribou	-4.99761					-0.453001	0.221589							103.413	2.31e-23	0.181988
Resident licence, male caribou	-4.81506							-0.128366		-0.288382			0.00791455	103.515	2.2e-23	0.189931
Resident licence, male caribou	-4.80814							-0.131949		-0.288134		-0.00635039		103.531	2.18e-23	0.189911
Resident licence, male caribou	-5.14975	0.348518	-0.00217755			-0.688761	0.265534	-0.0557054				-0.0075619	0.0752501	103.817	1.89e-23	0.221064
Resident licence, male caribou	-4.73493	0.118119						-0.0712302	-0.0643461	-0.247441				103.919	1.8e-23	0.197426
Resident licence, male caribou	-4.77682	0.082349								-0.276648		0.0454481		104.292	1.49e-23	0.188967
Resident licence, male caribou	-4.80919	0.0850546								-0.273412			0.0328735	104.512	1.33e-23	0.188695
Resident licence, male caribou	-4.75644	0.102991	-0.0217684							-0.274952				104.71	1.21e-23	0.188449
Resident licence, male caribou	-4.74657	0.224828				-0.22811		0.020312	-0.0783253	-0.202108		-0.0514392		104.762	1.18e-23	0.212165
Resident licence, male caribou	-4.78401	0.233891				-0.217799		0.0317887	-0.0738349	-0.206148			0.0410867	104.778	1.17e-23	0.212147
Resident licence, male caribou	-4.75049	0.261269				-0.275184								105.087	1e-23	0.179892
Resident licence, male caribou	-4.74219	0.218936	0.00200219			-0.21306		0.0363712	-0.0780851	-0.205899				105.46	8.31e-24	0.211325
Resident licence, male caribou	-4.92033	0.235334				-0.243276		-0.103611		-0.232425		-0.103771	0.0884775	105.484	8.21e-24	0.211296
Resident licence, male caribou	-4.77106					-0.0966638		-0.0110299	-0.043937	-0.25765				105.64	7.6e-24	0.195311
Resident licence, male caribou	-4.83478	0.110476						-0.159352		-0.277362			0.032519	105.716	7.31e-24	0.195217
Resident licence, male caribou	-4.7853	0.124747	-0.0186377					-0.158508		-0.278812				105.976	6.42e-24	0.194898
Resident licence, male caribou	-4.62362	0.280078				-0.266993		0.147909	-0.1407					106.138	5.92e-24	0.194698
Resident licence, male caribou	-4.80374	0.102146						-0.158152		-0.278332		0.00346023		106.165	5.84e-24	0.194665
Resident licence, male caribou	-4.82311					-0.106449		-0.0874718		-0.275145		-0.0382055		106.36	5.3e-24	0.194424
Resident licence, male caribou	-4.82182					-0.0964734		-0.0752238		-0.277419			0.00373727	106.739	4.38e-24	0.193957
Resident licence, male caribou	-4.78541									-0.285048		0.0314315	0.00154665	106.864	4.12e-24	0.185772
Resident licence, male caribou	-4.89204	0.237579	-0.00451478			-0.26277				-0.227304		-0.0767402	0.0791357	107.319	3.28e-24	0.209079
Resident licence, male caribou	-4.86705	0.219513	-0.00336597			-0.208025		-0.0724583		-0.241044			0.0500098	107.629	2.81e-24	0.208705
Resident licence, male caribou	-4.82484					-0.127079				-0.270127		-0.0273277	0.0139626	107.631	2.81e-24	0.192857
Resident licence, male caribou	-4.81972	0.212633	-0.00928069			-0.215304		-0.0898594		-0.240791		-0.0505032		107.981	2.36e-24	0.208279
Resident licence, male caribou	-4.89239					-0.423704	0.216993	0.0978928	-0.110267					108.403	1.91e-24	0.191904
Resident licence, male caribou	-4.76007							-0.0660346	-0.0448043	-0.267766		-0.00645665		108.864	1.51e-24	0.191334
Resident licence, male caribou	-4.75907							-0.0630928	-0.0448484	-0.268019			-0.0003454	108.876	1.51e-24	0.191319
Resident licence, male caribou	-4.83422	0.25212				-0.250656		-0.00195386	-0.0710406	-0.199543		-0.0983241	0.0774513	109.329	1.2e-24	0.21447
Resident licence, male caribou	-5.0043					-0.442966	0.223494	-0.0449907						109.509	1.1e-24	0.182472
Resident licence, male caribou	-5.00385					-0.454993	0.229708					0.0316691		109.629	1.03e-24	0.182322
Resident licence, male caribou	-4.99375					-0.453553	0.221672						-0.00421618	109.888	9.08e-25	0.181999
Resident licence, male caribou	-4.82077							-0.133925		-0.287834		-0.0133075	0.0125766	109.957	8.77e-25	0.189981
Resident licence, male caribou	-4.80968	0.280592				-0.282888							0.0608252	110.036	8.43e-25	0.181813
Resident licence, male caribou	-4.76063	0.123923						-0.0743109	-0.061854	-0.248104			0.0243761	110.152	7.96e-25	0.197733
Resident licence, male caribou	-4.72531	0.131262	-0.0109506					-0.0722627	-0.0629696	-0.248317				110.336	7.26e-25	0.197507
Resident licence, male caribou	-4.73449	0.118394						-0.0693885	-0.0643668	-0.247604		0.00423655		110.397	7.04e-25	0.197432
Resident licence, male caribou	-4.75749	0.264197				-0.296293						-0.0606829		110.484	6.74e-25	0.181252
Resident licence, male caribou	-4.7588	0.104364	-0.0181653							-0.27722		0.0429217		110.593	6.38e-25	0.189193
Resident licence, male caribou	-4.79585	0.0863446								-0.27571		0.0362023	0.0198198	110.638	6.24e-25	0.189138
Resident licence, male caribou	-4.78799	0.108519	-0.0194915							-0.274207			0.0309667	110.784	5.8e-25	0.188956
Resident licence, male caribou	-4.74605	0.225501	-0.000584382			-0.228063		0.0202087	-0.0782573	-0.202174		-0.0515002		111.245	4.61e-25	0.212166
Resident licence, male caribou	-4.78837	0.22889	0.00443726			-0.218318		0.0324567	-0.0743296	-0.205623			0.0414517	111.251	4.59e-25	0.212159
Resident licence, male caribou	-4.6343	0.283566				-0.285413		0.12515	-0.140041			-0.0688548		111.336	4.4e-25	0.196279
Resident licence, male caribou	-4.75329	0.261064				-0.266442		-0.0299285						111.408	4.25e-25	0.180096
Resident licence, male caribou	-4.75776	0.253336	0.00696444			-0.2759								111.545	3.97e-25	0.179923
Resident licence, male caribou	-4.77601					-0.106345		-0.0233045	-0.04379	-0.25544		-0.038004		111.744	3.59e-25	0.195777
Resident licence, male caribou	-4.91394	0.242229	-0.0060088			-0.242728		-0.103845		-0.232878		-0.10423	0.0881115	111.947	3.24e-25	0.21132
Resident licence, male caribou	-4.66648	0.292401				-0.272075		0.143279	-0.136566				0.0401584	111.969	3.21e-25	0.195501
Resident licence, male caribou	-4.8167	0.130449	-0.0165896					-0.158438		-0.277917			0.0310774	112.048	3.08e-25	0.195404
Resident licence, male caribou	-4.76593					-0.0969559		-0.0102373	-0.0446171	-0.257322			-0.00464651	112.113	2.98e-25	0.195323
Resident licence, male caribou	-4.84219	0.110907						-0.166567		-0.276618		-0.0171411	0.0385911	112.132	2.96e-25	0.1953
Resident licence, male caribou	-4.78527	0.124721	-0.0185646					-0.158092		-0.278844		0.000993411		112.458	2.51e-25	0.194898
Resident licence, male caribou	-4.63854	0.262316	0.0152279			-0.268402		0.149089	-0.141786					112.497	2.46e-25	0.194851
Resident licence, male caribou	-4.84381					-0.108067		-0.0903813		-0.27458		-0.0499938	0.0203585	112.694	2.23e-25	0.194609
Resident licence, male caribou	-4.86358	0.300111				-0.328059						-0.117374	0.103045	113.37	1.59e-25	0.185743
Resident licence, male caribou	-4.85999					-0.427745	0.218069	0.10332	-0.115294				-0.0308118	114.468	9.2e-26	0.192421
Resident licence, male caribou	-4.89551					-0.425969	0.222137	0.104464	-0.110202			0.0222216		114.763	7.93e-26	0.192056
Resident licence, male caribou	-4.76288							-0.0671306	-0.0443813	-0.267541		-0.00766349	0.00236467	115.346	5.93e-26	0.191336
Resident licence, male caribou	-4.73064	0.312118				-0.308407		0.0990814	-0.130753			-0.118029	0.083449	115.569	5.3e-26	0.19904
Resident licence, male caribou	-4.83538	0.250725	0.00121783			-0.250765		-0.00175104	-0.0711723	-0.199404		-0.0982146	0.077513	115.812	4.7e-26	0.214471
Resident licence, male caribou	-5.00789					-0.445959	0.229235	-0.0380196				0.0236226		115.853	4.6e-26	0.182647
Resident licence, male caribou	-5.00018					-0.443515	0.223581	-0.0450699					-0.0045096	115.983	4.31e-26	0.182484
Resident licence, male caribou	-4.98903					-0.457987	0.232756					0.0421312	-0.0183881	115.986	4.3e-26	0.182479
Resident licence, male caribou	-4.81253	0.280345				-0.274313		-0.0298738					0.0608352	116.356	3.58e-26	0.182017
Resident licence, male caribou	-4.8226	0.267937	0.0113484			-0.284165							0.0619307	116.454	3.41e-26	0.181895
Resident licence, male caribou	-4.76357	0.264121				-0.284776		-0.0518577				-0.0706799		116.51	3.31e-26	0.181825
Resident licence, male caribou	-4.75142	0.13546	-0.00972163					-0.0750074	-0.060743	-0.249235			0.0237603	116.583	3.19e-26	0.197797
Resident licence, male caribou	-4.766	0.124178						-0.0794174	-0.061393	-0.248233		-0.0109189	0.0283802	116.608	3.15e-26	0.197766
Resident licence, male caribou	-4.72513	0.131237	-0.0107953					-0.0708522	-0.0630684	-0.248797		0.00263627		116.817	2.84e-26	0.19751
Resident licence, male caribou	-4.77756	0.107334	-0.0174874							-0.276291		0.0341717	0.0188351	116.952	2.66e-26	0.189347
Resident licence, male caribou	-4.76172	0.259543	0.0040842			-0.296641						-0.0603359		116.959	2.65e-26	0.181263
Resident licence, male caribou	-4.64531	0.270281	0.011376			-0.286171		0.126323	-0.140823			-0.0675708		117.75	1.78e-26	0.196363
Resident licence, male caribou	-4.76012	0.253591	0.0065605			-0.267218		-0.0296966						117.868	1.68e-26	0.180123
Resident licence, male caribou	-4.58533	0.16044						0.0388387	-0.141236					118.127	1.48e-26	0.171629
Resident licence, male caribou	-4.78819					-0.10715		-0.0272048	-0.0421569	-0.255605		-0.0438371	0.0102751	118.191	1.43e-26	0.195822
Resident licence, male caribou	-4.68544	0.2721	0.0177384			-0.273853		0.144564	-0.137667				0.041632	118.286	1.36e-26	0.195705
Resident licence, male caribou	-4.73374					-0.138565								118.38	1.3e-26	0.154714
Resident licence, male caribou	-4.824	0.132024	-0.017501					-0.166433		-0.277094		-0.01918	0.0378025	118.447	1.26e-26	0.195507
Resident licence, male caribou	-4.87899	0.302548				-0.315076		-0.0717227				-0.135909	0.109738	118.978	9.64e-27	0.186832
Resident licence, male caribou	-4.70169													119.71	6.69e-27	0.144555
Resident licence, male caribou	-4.87242	0.291006	0.00811634			-0.328754						-0.116741	0.103494	119.82	6.33e-27	0.185785
Resident licence, male caribou	-4.84825					-0.435137	0.230676	0.121688	-0.118028			0.0515609	-0.0488043	120.421	4.69e-27	0.193075
Resident licence, male caribou	-4.69535	0.115011												120.967	3.57e-27	0.151364
Resident licence, male caribou	-4.60188							0.0675751	-0.123826					121.174	3.22e-27	0.159468
Resident licence, male caribou	-4.74396	0.29688	0.013134			-0.309327		0.100352	-0.131547			-0.11661	0.0839443	121.961	2.17e-27	0.19915
Resident licence, male caribou	-4.99502					-0.449018	0.231848	-0.0354975				0.0331034	-0.0156035	122.246	1.88e-27	0.182758
Resident licence, male caribou	-4.62434					-0.12409		0.12731	-0.118685					122.432	1.71e-27	0.166158
Resident licence, male caribou	-4.8249	0.268159	0.0109207			-0.275671		-0.0294295					0.0618772	122.778	1.44e-27	0.182093
Resident licence, male caribou	-4.76677	0.260575	0.00311168			-0.285091		-0.051678				-0.0703876		122.988	1.3e-27	0.181831
Resident licence, male caribou	-4.75676	0.13651	-0.0104019					-0.0810101	-0.0601118	-0.248987		-0.0123125	0.0281503	123.032	1.27e-27	0.197838
Resident licence, male caribou	-4.71595	0.136711						-0.139839						123.604	9.54e-28	0.15634
Resident licence, male caribou	-4.73945					-0.154922						-0.0527756		124.046	7.65e-28	0.15577
Resident licence, male caribou	-4.71739							-0.0978599						124.204	7.07e-28	0.147153
Resident licence, male caribou	-4.60385	0.164609						0.0367236	-0.139475				0.0177573	124.478	6.17e-28	0.171796
Resident licence, male caribou	-4.58637	0.15994						0.0352651	-0.14109			-0.0080647		124.59	5.83e-28	0.171653
Resident licence, male caribou	-4.58406	0.162047	-0.00134547					0.0387922	-0.141115					124.609	5.77e-28	0.17163
Resident licence, male caribou	-4.73657					-0.13062		-0.0283909						124.718	5.47e-28	0.154902
Resident licence, male caribou	-4.73491					-0.138426							0.00124024	124.863	5.09e-28	0.154714
Resident licence, male caribou	-4.88638	0.294887	0.00679662			-0.315756		-0.0713511				-0.135341	0.110129	125.438	3.82e-28	0.186862
Resident licence, male caribou	-4.71095												0.00960157	126.152	2.67e-28	0.144608
Resident licence, male caribou	-4.7016											0.00235348		126.192	2.62e-28	0.144557
Resident licence, male caribou	-4.73061	0.124175											0.037106	126.857	1.88e-28	0.152133
Resident licence, male caribou	-4.69429	0.117777										0.0212744		127.298	1.5e-28	0.15156
Resident licence, male caribou	-4.67997	0.133209	-0.0151898											127.321	1.49e-28	0.151531
Resident licence, male caribou	-4.60462							0.0573911	-0.12353			-0.0227033		127.508	1.36e-28	0.159661
Resident licence, male caribou	-4.58406							0.0690537	-0.126				-0.0165574	127.536	1.34e-28	0.159624
Resident licence, male caribou	-4.63371					-0.137262		0.107105	-0.117396			-0.0577097		128.013	1.05e-28	0.167307
Resident licence, male caribou	-4.60112					-0.125378		0.130405	-0.121544				-0.0216674	128.711	7.43e-29	0.166418
Resident licence, male caribou	-4.75185	0.145899						-0.140002					0.0377019	129.473	5.07e-29	0.157132
Resident licence, male caribou	-4.70232	0.152662	-0.0133555					-0.139264						129.989	3.92e-29	0.156467
Resident licence, male caribou	-4.71734	0.135835						-0.144885				-0.0125205		130.04	3.82e-29	0.1564
Resident licence, male caribou	-4.74528					-0.144687		-0.0477658				-0.0620699		130.141	3.63e-29	0.156271
Resident licence, male caribou	-4.76246					-0.156878						-0.0648572	0.0229572	130.334	3.3e-29	0.156021
Resident licence, male caribou	-4.72018							-0.108802				-0.0258073		130.49	3.05e-29	0.14741
Resident licence, male caribou	-4.72369							-0.0973743					0.00659784	130.668	2.79e-29	0.147178
Resident licence, male caribou	-4.61444	0.165086						0.0267632	-0.138452			-0.0215267	0.0254645	130.852	2.55e-29	0.171934
Resident licence, male caribou	-4.60332	0.164965	-0.000342232					0.0370094	-0.139562				0.0176753	130.961	2.41e-29	0.171796
Resident licence, male caribou	-4.58448	0.16237	-0.00204689					0.0350569	-0.1409			-0.00838108		131.071	2.28e-29	0.171656
Resident licence, male caribou	-4.7376					-0.130566		-0.0283569					0.00108695	131.2	2.14e-29	0.154903
Resident licence, male caribou	-4.71218											-0.003024	0.0107493	132.633	1.04e-29	0.144612
Resident licence, male caribou	-4.71676	0.138948	-0.0125671										0.0359212	133.252	7.67e-30	0.152247
Resident licence, male caribou	-4.72886	0.124328										0.00458453	0.0354946	133.334	7.36e-30	0.152141
Resident licence, male caribou	-4.68073	0.133697	-0.0134906									0.0193222		133.682	6.19e-30	0.15169
Resident licence, male caribou	-4.59276							0.0608362	-0.124974			-0.0170619	-0.0103992	133.951	5.4e-30	0.159711
Resident licence, male caribou	-4.63095					-0.137115		0.107907	-0.117739			-0.0563746	-0.0023801	134.494	4.12e-30	0.16731
Resident licence, male caribou	-4.76972	0.146704						-0.155964				-0.04014	0.0519469	135.575	2.4e-30	0.157623
Resident licence, male caribou	-4.73985	0.158714	-0.0108987					-0.139586					0.0367786	135.891	2.05e-30	0.157216
Resident licence, male caribou	-4.77275					-0.146371		-0.0518808				-0.0772614	0.0268656	136.36	1.62e-30	0.156611
Resident licence, male caribou	-4.7028	0.152959	-0.0144629					-0.14504				-0.0145427		136.41	1.58e-30	0.156547
Resident licence, male caribou	-4.73991							-0.111819				-0.0364864	0.0194866	136.835	1.28e-30	0.14759
Resident licence, male caribou	-4.6128	0.167157	-0.00174908					0.0265964	-0.138296			-0.0217984	0.0254434	137.333	9.96e-31	0.171936
Resident licence, male caribou	-4.71586	0.138801	-0.0123613									0.00299681	0.0348952	139.733	3e-31	0.15225
Resident licence, male caribou	-4.75597	0.16226	-0.0132076					-0.156089				-0.0418756	0.0514628	141.963	9.84e-32	0.157746
Resident licence, female caribou	-5.92797	0.32818		-0.959945	0.258327			0.0944734	-0.219576	-0.319651	0.189999			0	0.654085	0.293895
Resident licence, female caribou	-5.72487	0.338697		-1.09621	0.30651			0.165229	-0.227722					2.9299	0.151152	0.276522
Resident licence, female caribou	-5.92675	0.331223		-0.957924	0.265127			0.120198	-0.224443	-0.325337	0.190661	0.0659381		5.59998	0.0397754	0.294848
Resident licence, female caribou	-6.03181	0.278364		-0.927207	0.215198					-0.328924	0.163466			6.25405	0.0286804	0.272835
Resident licence, female caribou	-5.92686	0.330104	-0.00151377	-0.960087	0.258375			0.0941723	-0.219376	-0.319937	0.190059			6.48199	0.025591	0.293896
Resident licence, female caribou	-5.92705	0.32791		-0.960083	0.258397			0.0946612	-0.219675	-0.319638	0.190009		-0.000965112	6.48276	0.0255812	0.293895
Resident licence, female caribou	-5.77008	0.325148		-1.06103	0.306371			0.114122	-0.207789	-0.103844				7.09805	0.0188067	0.279078
Resident licence, female caribou	-5.8562	0.298577		-1.04858	0.252941									8.71209	0.00839126	0.255482
Resident licence, female caribou	-5.72222	0.341477		-1.09682	0.312433			0.186487	-0.232264			0.0536758		8.80553	0.00800824	0.277194
Resident licence, female caribou	-6.06692	0.288027		-0.884821	0.211389			-0.164457		-0.367436	0.174951			9.10444	0.00689653	0.276863
Resident licence, female caribou	-5.73525	0.322663	0.0124367	-1.09435	0.306069			0.166899	-0.229088					9.34942	0.00610145	0.276592
Resident licence, female caribou	-5.72457	0.338614		-1.09627	0.306535			0.165288	-0.22775				-0.000309229	9.41297	0.00591062	0.276522
Resident licence, female caribou	-5.89375	0.279273		-1.01387	0.259069					-0.142031				10.2714	0.00384789	0.261066
Resident licence, female caribou	-6.03848	0.282132		-0.917391	0.220666					-0.340925	0.1655	0.0694798		11.6853	0.00189759	0.274004
Resident licence, female caribou	-5.89634	0.323433		-0.962065	0.269347			0.133586	-0.2289	-0.326877	0.191157	0.0841641	-0.0313881	11.8225	0.00177175	0.295129
Resident licence, female caribou	-5.93007	0.325425	0.00458051	-0.957435	0.265053			0.121444	-0.225113	-0.324531	0.19048	0.0667748		12.075	0.00156164	0.294856
Resident licence, female caribou	-6.0148	0.304767	-0.0204205	-0.930539	0.216392					-0.332179	0.164402			12.557	0.00122722	0.273036
Resident licence, female caribou	-6.04342	0.282212		-0.925563	0.214449					-0.328327	0.163377		0.0133939	12.6757	0.00115647	0.272904
Resident licence, female caribou	-5.76904	0.327873		-1.05999	0.313311			0.136983	-0.212234	-0.108366		0.0622095		12.7831	0.00109601	0.279958
Resident licence, female caribou	-5.92585	0.329865	-0.00155122	-0.960238	0.258451			0.0943636	-0.219475	-0.319933	0.190073		-0.00103057	12.9647	0.00100089	0.293897
Resident licence, female caribou	-5.77442	0.317951	0.00564362	-1.06037	0.306142			0.115268	-0.208558	-0.103096				13.5685	0.000740055	0.279092
Resident licence, female caribou	-5.77037	0.325236		-1.06097	0.306338			0.114038	-0.207755	-0.103803			0.000307311	13.5811	0.000735413	0.279078
Resident licence, female caribou	-5.8661	0.306383		-1.0336	0.251906			-0.0874989						14.1238	0.000560646	0.2567
Resident licence, female caribou	-5.91489	0.287064		-0.985219	0.259049			-0.131832		-0.162473				14.4423	0.000478117	0.263674
Resident licence, female caribou	-5.85796	0.301473		-1.04606	0.256496							0.0392787		14.8451	0.000390895	0.25588
Resident licence, female caribou	-5.87238	0.303689		-1.04657	0.25203								0.0181346	15.0813	0.000347351	0.255611
Resident licence, female caribou	-5.74396	0.312614		-0.603615				0.0212095	-0.165643	-0.385674	0.252712			15.0964	0.000344732	0.270207
Resident licence, female caribou	-5.69738	0.33522		-1.10025	0.315791			0.196815	-0.235824			0.0678371	-0.024944	15.122	0.000340351	0.277378
Resident licence, female caribou	-5.73724	0.318067	0.0182644	-1.09403	0.312167			0.190472	-0.234606			0.0572988		15.1539	0.000334975	0.277343
Resident licence, female caribou	-5.85073	0.306292	-0.00597663	-1.0497	0.253272									15.1795	0.000330716	0.2555
Resident licence, female caribou	-6.0681	0.289731		-0.882599	0.215161			-0.151615		-0.37124	0.175051	0.0416304		15.2354	0.000321599	0.277253
Resident licence, female caribou	-6.04704	0.31942	-0.0243115	-0.888322	0.212897			-0.166133		-0.371563	0.176116			15.3358	0.000305844	0.277142
Resident licence, female caribou	-6.08525	0.294027		-0.881853	0.210233			-0.166624		-0.366996	0.175027		0.0205564	15.4438	0.000289776	0.277022
Resident licence, female caribou	-5.83722	0.272767		-0.633004						-0.375338	0.218368			15.6207	0.000265237	0.254997
Resident licence, female caribou	-5.7354	0.322701	0.012443	-1.09436	0.306064			0.166876	-0.229073				0.000150926	15.8325	0.000238587	0.276592
Resident licence, female caribou	-5.89861	0.282517		-1.00714	0.264903					-0.150122		0.0610799		15.9378	0.000226348	0.261988
Resident licence, female caribou	-5.88185	0.296839	-0.0135739	-1.0164	0.260013					-0.143322				16.6749	0.000156577	0.261156
Resident licence, female caribou	-5.90606	0.28337		-1.01231	0.258339					-0.141406			0.0140269	16.6863	0.000155688	0.261143
Resident licence, female caribou	-5.87879	0.283703		-0.593494				-0.173442		-0.41527	0.230957			18.0138	8.02e-05	0.259642
Resident licence, female caribou	-6.02541	0.302067	-0.0154904	-0.920354	0.221445					-0.343029	0.166148	0.0673048		18.0661	7.81e-05	0.274118
Resident licence, female caribou	-6.02809	0.278925		-0.917964	0.221911					-0.342614	0.165743	0.0761293	-0.0126514	18.1236	7.59e-05	0.274054
Resident licence, female caribou	-5.89993	0.316876	0.00515126	-0.961552	0.269296			0.135036	-0.229678	-0.325968	0.190953	0.0851707	-0.0315377	18.2954	6.96e-05	0.29514
Resident licence, female caribou	-6.02576	0.307335	-0.0197394	-0.928995	0.2157					-0.331513	0.164281		0.0119787	18.9912	4.92e-05	0.27309
Resident licence, female caribou	-5.74133	0.320651		-1.06354	0.317084			0.148285	-0.21605	-0.109413		0.0787498	-0.02836	19.0524	4.77e-05	0.280193
Resident licence, female caribou	-5.77802	0.312902	0.0117877	-1.05849	0.313062			0.140263	-0.214024	-0.106961		0.0644179		19.211	4.41e-05	0.280018
Resident licence, female caribou	-5.77495	0.318063	0.00565423	-1.06036	0.306128			0.115154	-0.20851	-0.1031			0.000477604	20.0513	2.89e-05	0.279093
Resident licence, female caribou	-5.88635	0.312877		-1.03082	0.250798			-0.0900274					0.0223522	20.4349	2.39e-05	0.256896
Resident licence, female caribou	-5.86634	0.307625		-1.03345	0.254245			-0.0800175				0.0246085		20.4785	2.34e-05	0.256846
Resident licence, female caribou	-5.85941	0.315888	-0.00735197	-1.03491	0.252318			-0.0878345						20.5834	2.22e-05	0.256727
Resident licence, female caribou	-5.91628	0.288643		-0.983455	0.263014			-0.120091		-0.165941		0.0405211		20.5871	2.21e-05	0.264055
Resident licence, female caribou	-5.93211	0.292774		-0.982803	0.258107			-0.133728		-0.161841			0.0192435	20.7977	1.99e-05	0.263818
Resident licence, female caribou	-5.90052	0.308618	-0.0166465	-0.988043	0.260258			-0.133009		-0.164199				20.8073	1.98e-05	0.263807
Resident licence, female caribou	-6.00715			-0.817907	0.206704					-0.374679	0.165692			21.1774	1.65e-05	0.24864
Resident licence, female caribou	-5.86305	0.302872		-1.04568	0.25594							0.0362679	0.00581131	21.3188	1.54e-05	0.255891
Resident licence, female caribou	-5.85549	0.304902	-0.00267902	-1.0466	0.256609							0.0388612		21.3249	1.53e-05	0.255884
Resident licence, female caribou	-5.7409	0.313539		-0.598486				0.0321535	-0.167292	-0.388806	0.253642	0.0276488		21.4211	1.46e-05	0.270384
Resident licence, female caribou	-5.71219	0.310698	0.0189704	-1.0975	0.315656			0.201241	-0.238386			0.0719941	-0.0257556	21.4599	1.43e-05	0.277538
Resident licence, female caribou	-5.76125	0.317176		-0.602411				0.0179618	-0.164053	-0.385513	0.252314		0.0169495	21.4838	1.41e-05	0.270314
Resident licence, female caribou	-6.05057	0.317211	-0.0213629	-0.885941	0.216199			-0.154202		-0.374576	0.176071	0.0382219		21.5269	1.38e-05	0.277464
Resident licence, female caribou	-5.86743	0.310218	-0.00512259	-1.04758	0.252335								0.0178385	21.5528	1.37e-05	0.255625
Resident licence, female caribou	-5.74693	0.30784	0.00379863	-0.603488				0.0219335	-0.166123	-0.385012	0.252539			21.5741	1.35e-05	0.270213
Resident licence, female caribou	-5.83827	0.274796		-0.620943						-0.384539	0.220833	0.0453737		21.6445	1.3e-05	0.25552
Resident licence, female caribou	-6.06487	0.323808	-0.023377	-0.885494	0.211803			-0.168132		-0.370968	0.176127		0.019109	21.695	1.27e-05	0.277278
Resident licence, female caribou	-6.07456	0.291694		-0.88179	0.214339			-0.153747		-0.370658	0.175063	0.0372735	0.00738895	21.704	1.27e-05	0.277269
Resident licence, female caribou	-5.86045	0.279759		-0.631568						-0.374102	0.217952		0.0251909	21.8882	1.16e-05	0.255243
Resident licence, female caribou	-5.82719	0.287096	-0.0111716	-0.633704						-0.37704	0.219047			22.0494	1.07e-05	0.255059
Resident licence, female caribou	-5.92342			-0.828314	0.237962			0.0732785	-0.169112	-0.373823	0.186427			22.1662	1.01e-05	0.262276
Resident licence, female caribou	-5.8906	0.294152	-0.00902798	-1.00903	0.265425					-0.150805		0.0597748		22.386	9.01e-06	0.262028
Resident licence, female caribou	-5.8912	0.280244		-1.00749	0.265809					-0.151229		0.0658832	-0.00881511	22.3992	8.95e-06	0.262013
Resident licence, female caribou	-5.89404	0.299814	-0.0128886	-1.01483	0.259286					-0.142648			0.0131973	23.0978	6.31e-06	0.261224
Resident licence, female caribou	-5.90954	0.292873		-0.591048				-0.17663		-0.41434	0.230773		0.0324941	24.1402	3.75e-06	0.260045
Resident licence, female caribou	-5.86595	0.302226	-0.0144856	-0.594111				-0.174287		-0.417598	0.231868			24.4071	3.28e-06	0.259743
Resident licence, female caribou	-5.87802	0.284096		-0.59111				-0.169284		-0.416792	0.231291	0.012764		24.4634	3.19e-06	0.25968
Resident licence, female caribou	-6.01443	0.29906	-0.0157408	-0.920963	0.222734					-0.344831	0.166421	0.0741921	-0.0131174	24.501	3.13e-06	0.274171
Resident licence, female caribou	-5.86982			-0.902239	0.25174					-0.189574				25.3043	2.09e-06	0.236351
Resident licence, female caribou	-6.03589			-0.780951	0.204191			-0.129906		-0.408437	0.174753			25.3394	2.06e-06	0.251302
Resident licence, female caribou	-5.7504	0.304666	0.0124929	-1.06204	0.316905			0.151909	-0.218018	-0.10793		0.0813125	-0.0288354	25.4736	1.92e-06	0.280261
Resident licence, female caribou	-5.55796	0.287857		-0.704819										26.0072	1.47e-06	0.227914
Resident licence, female caribou	-5.96484			-0.83153	0.210336					-0.374132	0.165728		-0.0504738	26.7267	1.03e-06	0.249712
Resident licence, female caribou	-5.85403			-0.851378	0.245253			0.0910071	-0.180303	-0.369255	0.187278		-0.072494	26.7687	1.01e-06	0.264394
Resident licence, female caribou	-5.88181	0.312107		-1.03145	0.252451			-0.0849731				0.0147348	0.0171666	26.8815	9.51e-07	0.256937
Resident licence, female caribou	-5.88023	0.321067	-0.00640704	-1.03203	0.251187			-0.0902945					0.0220175	26.9001	9.43e-07	0.256916
Resident licence, female caribou	-5.86151	0.314441	-0.00530093	-1.0344	0.254452			-0.0805547				0.0237001		26.9495	9.2e-07	0.25686
Resident licence, female caribou	-5.90448	0.306184	-0.0135903	-0.985915	0.2638			-0.121734		-0.167176		0.0383244		26.9925	9e-07	0.264142
Resident licence, female caribou	-5.92158	0.29029		-0.982871	0.262347			-0.121746		-0.165385		0.0369016	0.00606894	27.0603	8.7e-07	0.264066
Resident licence, female caribou	-5.91768	0.313008	-0.0158193	-0.985637	0.25932			-0.134795		-0.163505			0.0183566	27.1745	8.22e-07	0.263937
Resident licence, female caribou	-6.0112			-0.808895	0.210097					-0.383555	0.166997	0.0470919		27.1841	8.18e-07	0.249187
Resident licence, female caribou	-5.86041	0.306249	-0.00265289	-1.04598	0.255974							0.0359472	0.00573581	27.7988	6.01e-07	0.255894
Resident licence, female caribou	-5.7507	0.315791		-0.59886				0.0283782	-0.166123	-0.388121	0.25325	0.022505	0.00901854	27.8831	5.77e-07	0.270408
Resident licence, female caribou	-5.74602	0.305092	0.00676441	-0.598004				0.0339994	-0.168232	-0.387766	0.253377	0.0290162		27.8866	5.76e-07	0.270404
Resident licence, female caribou	-5.76524	0.311347	0.00470545	-0.602227				0.0188095	-0.164619	-0.384684	0.252091		0.0172633	27.9584	5.55e-07	0.270324
Resident licence, female caribou	-6.05694	0.319089	-0.0213254	-0.885159	0.215402			-0.156302		-0.373985	0.176075	0.0339368	0.00723997	27.9961	5.45e-07	0.27748
Resident licence, female caribou	-5.84926	0.277832		-0.621939						-0.382685	0.220312	0.0392747	0.0120297	28.0873	5.21e-07	0.255566
Resident licence, female caribou	-5.83168	0.284132	-0.00731852	-0.621731						-0.385418	0.221216	0.0441745		28.1043	5.16e-07	0.255547
Resident licence, female caribou	-5.81264			-0.937419	0.238361									28.1196	5.12e-07	0.225417
Resident licence, female caribou	-5.92214			-0.825152	0.241826			0.0894705	-0.171825	-0.377606	0.186702	0.0404689		28.3239	4.63e-07	0.262643
Resident licence, female caribou	-5.85119	0.29165	-0.00944987	-0.632218						-0.375565	0.218533		0.0243499	28.3325	4.61e-07	0.255287
Resident licence, female caribou	-5.69262			-0.973419	0.281516			0.183667	-0.187981					28.3498	4.57e-07	0.240355
Resident licence, female caribou	-5.77242			-0.925808	0.28674			0.0928365	-0.157426	-0.165414				28.6637	3.9e-07	0.247487
Resident licence, female caribou	-5.58495	0.273472		-0.670126						-0.12269				28.8329	3.59e-07	0.23222
Resident licence, female caribou	-5.88296	0.291978	-0.0091422	-1.00941	0.266352					-0.151948		0.0646606	-0.00897505	28.8465	3.56e-07	0.262053
Resident licence, female caribou	-5.43051	0.317755		-0.687121				0.0822676	-0.156709					28.9483	3.39e-07	0.239659
Resident licence, female caribou	-5.82108			-0.539634						-0.413344	0.21855			29.3208	2.81e-07	0.231647
Resident licence, female caribou	-5.88686			-0.878281	0.252445			-0.0982096		-0.207519				30.4788	1.57e-07	0.237878
Resident licence, female caribou	-5.89752	0.308618	-0.0125208	-0.591668				-0.177311		-0.416369	0.231562		0.0315069	30.5565	1.51e-07	0.260121
Resident licence, female caribou	-5.91242	0.293377		-0.592261				-0.179278		-0.413462	0.230568	-0.00731886	0.0350479	30.6145	1.47e-07	0.260055
Resident licence, female caribou	-5.82711			-0.915327	0.254957					-0.188877			-0.0502972	30.8501	1.31e-07	0.237445
Resident licence, female caribou	-5.86616	0.301375	-0.0135674	-0.592156				-0.170891		-0.418697	0.232085	0.0103104		30.8688	1.3e-07	0.259768
Resident licence, female caribou	-5.99563			-0.794454	0.207495			-0.12642		-0.406945	0.174443		-0.0468877	31.0221	1.2e-07	0.252218
Resident licence, female caribou	-5.56971	0.296684		-0.69064				-0.0918442						31.3172	1.04e-07	0.229298
Resident licence, female caribou	-5.81484			-0.854217	0.25919			0.141617	-0.192653	-0.377003	0.188138	0.10573	-0.1098	31.4311	9.78e-08	0.266439
Resident licence, female caribou	-5.87281			-0.895966	0.255383					-0.195564		0.0393603		31.4538	9.67e-08	0.236741
Resident licence, female caribou	-6.03628			-0.778913	0.206111			-0.122573		-0.410715	0.174794	0.0224285		31.7226	8.46e-08	0.251417
Resident licence, female caribou	-5.94734			-0.822053	0.219206					-0.390795	0.167969	0.0899335	-0.0802704	31.7457	8.36e-08	0.25139
Resident licence, female caribou	-5.58721	0.296212		-0.70319									0.0307322	32.1668	6.77e-08	0.228296
Resident licence, female caribou	-5.5575	0.288311		-0.70357								0.00690093		32.4792	5.79e-08	0.227927
Resident licence, female caribou	-5.56322	0.281094	0.0052816	-0.704456										32.4793	5.79e-08	0.227927
Resident licence, female caribou	-5.61976			-0.995773	0.289693			0.198449	-0.198582				-0.0779246	32.6255	5.38e-08	0.242914
Resident licence, female caribou	-5.60659	0.282316		-0.643301				-0.130761		-0.14295				33.0529	4.35e-08	0.234872
Resident licence, female caribou	-5.85576			-0.504999				-0.138053		-0.449115	0.22895			33.1668	4.11e-08	0.234739
Resident licence, female caribou	-5.47574	0.306298		-0.655068				0.0312718	-0.137518	-0.102724				33.1816	4.08e-08	0.24227
Resident licence, female caribou	-5.70389			-0.94765	0.293328			0.109048	-0.167922	-0.160419			-0.0705313	33.3409	3.76e-08	0.249562
Resident licence, female caribou	-5.87694	0.319084	-0.00541577	-1.03243	0.252664			-0.0855445				0.0137614	0.0172246	33.3519	3.74e-08	0.256952
Resident licence, female caribou	-5.90982	0.307838	-0.0135894	-0.985333	0.263133			-0.123406		-0.166608		0.0346766	0.0060953	33.4657	3.54e-08	0.264153
Resident licence, female caribou	-5.76864			-0.950517	0.242101								-0.0521521	33.5963	3.31e-08	0.226608
Resident licence, female caribou	-5.75159			-0.507539				0.0112493	-0.125101	-0.4272	0.245191			34.1598	2.5e-08	0.241136
Resident licence, female caribou	-5.75574	0.307373	0.00672785	-0.598379				0.0302458	-0.167064	-0.387097	0.252992	0.0239101	0.00896708	34.3488	2.27e-08	0.270427
Resident licence, female caribou	-5.81599			-0.931471	0.237988			-0.0298123						34.4721	2.14e-08	0.225571
Resident licence, female caribou	-5.8427	0.286672	-0.00698427	-0.622681						-0.383559	0.220688	0.0382639	0.0117476	34.5492	2.06e-08	0.25559
Resident licence, female caribou	-5.81284			-0.936868	0.238837							0.00543524		34.5959	2.01e-08	0.225425
Resident licence, female caribou	-5.69112			-0.97252	0.283801			0.192887	-0.189775			0.0228637		34.7236	1.89e-08	0.240482
Resident licence, female caribou	-5.77154			-0.923289	0.290772			0.107041	-0.15989	-0.168615		0.0383202		34.8508	1.77e-08	0.247827
Resident licence, female caribou	-5.61082	0.281178		-0.668742						-0.121634			0.0275088	35.0561	1.6e-08	0.232525
Resident licence, female caribou	-5.58404	0.274554		-0.664228						-0.125909		0.0241441		35.1829	1.5e-08	0.232376
Resident licence, female caribou	-5.44831	0.292601	0.0199703	-0.685905				0.0850688	-0.158904					35.27	1.43e-08	0.239847
Resident licence, female caribou	-5.45159	0.323241		-0.685995				0.0786856	-0.154929				0.0202311	35.2928	1.42e-08	0.23982
Resident licence, female caribou	-5.58603	0.272046	0.00110494	-0.670052						-0.122634				35.3156	1.4e-08	0.23222
Resident licence, female caribou	-5.7881			-0.545779						-0.413554	0.219128		-0.0363059	35.3268	1.39e-08	0.232207
Resident licence, female caribou	-5.42958	0.31796		-0.68656				0.0845525	-0.157089			0.00542419		35.425	1.33e-08	0.239667
Resident licence, female caribou	-5.82173			-0.531856						-0.419101	0.219991	0.0267552		35.6464	1.19e-08	0.231832
Resident licence, female caribou	-5.8455			-0.891401	0.255358			-0.0949322		-0.206356			-0.0479262	36.1155	9.4e-09	0.238864
Resident licence, female caribou	-5.80979			-0.908993	0.264449					-0.201342		0.0821454	-0.0779137	36.1217	9.37e-09	0.238856
Resident licence, female caribou	-5.97809			-0.794522	0.214404			-0.104268		-0.412531	0.174231	0.0629306	-0.0681995	36.8611	6.48e-09	0.252954
Resident licence, female caribou	-5.88747			-0.876451	0.254564			-0.0913779		-0.209862		0.0223519		36.8614	6.48e-09	0.237995
Resident licence, female caribou	-5.90068	0.310091	-0.0131652	-0.593286				-0.180823		-0.415311	0.231334	-0.00963552	0.0348143	37.0244	5.97e-09	0.260138
Resident licence, female caribou	-5.60317	0.306407		-0.688338				-0.0953408					0.0347383	37.3876	4.98e-09	0.229784
Resident licence, female caribou	-5.57095	0.29633		-0.692578				-0.0952774				-0.0109432		37.7739	4.1e-09	0.229329
Resident licence, female caribou	-5.57385	0.291348	0.00417889	-0.6904				-0.0916729						37.7936	4.06e-09	0.229306
Resident licence, female caribou	-5.58467			-1.00049	0.301549			0.239222	-0.209419			0.0865351	-0.108907	37.8206	4.01e-09	0.244404
Resident licence, female caribou	-5.66624			-0.951408	0.30764			0.155046	-0.179563	-0.167122		0.102459	-0.106931	38.0991	3.49e-09	0.251539
Resident licence, female caribou	-5.59522	0.286897	0.0074102	-0.702631									0.0313936	38.6283	2.68e-09	0.228322
Resident licence, female caribou	-5.59131	0.296593		-0.705246								-0.0103969	0.0342796	38.6293	2.68e-09	0.22832
Resident licence, female caribou	-5.56348	0.280617	0.00607614	-0.702908								0.00797287		38.9479	2.28e-09	0.227945
Resident licence, female caribou	-5.63713	0.291462		-0.641231				-0.133489		-0.141942			0.0320903	39.1836	2.03e-09	0.235284
Resident licence, female caribou	-5.82538			-0.511029				-0.135917		-0.448675	0.229206		-0.0327648	39.2629	1.95e-09	0.235192
Resident licence, female caribou	-5.49688	0.311851		-0.653756				0.0277249	-0.135719	-0.102648			0.0203888	39.5238	1.71e-09	0.242434
Resident licence, female caribou	-5.60548	0.283764	-0.00114071	-0.643356				-0.130821		-0.14303				39.5353	1.7e-09	0.234873
Resident licence, female caribou	-5.60651	0.282343		-0.643108				-0.130397		-0.143078		0.00122401		39.5356	1.7e-09	0.234873
Resident licence, female caribou	-5.48819	0.287744	0.0148325	-0.654524				0.0342102	-0.139483	-0.10121				39.5772	1.67e-09	0.242372
Resident licence, female caribou	-5.47396	0.306732		-0.652896				0.0357695	-0.138195	-0.103294		0.0124191		39.632	1.62e-09	0.242308
Resident licence, female caribou	-5.85596			-0.505549				-0.138954		-0.448869	0.228902	-0.00249383		39.6485	1.61e-09	0.234741
Resident licence, female caribou	-5.69944			-0.516584				0.0220677	-0.131985	-0.425385	0.246762		-0.0503368	39.7459	1.53e-09	0.242176
Resident licence, female caribou	-5.75808			-0.948753	0.246276							0.0404027	-0.0657538	39.7705	1.51e-09	0.226973
Resident licence, female caribou	-5.77215			-0.944982	0.241679			-0.0265717					-0.0514928	39.9763	1.36e-09	0.226729
Resident licence, female caribou	-5.75058			-0.505739				0.0147757	-0.125576	-0.42817	0.245435	0.0086562		40.6275	9.85e-10	0.241154
Resident licence, female caribou	-5.81605			-0.931622	0.237956			-0.0300624				-0.000756659		40.955	8.36e-10	0.225571
Resident licence, female caribou	-5.7732			-0.532607						-0.425295	0.222198	0.0542742	-0.0538483	41.259	7.18e-10	0.232854
Resident licence, female caribou	-5.60658	0.280554		-0.666126						-0.123343		0.0118795	0.0234424	41.5127	6.33e-10	0.232556
Resident licence, female caribou	-5.61403	0.277373	0.00302119	-0.668524						-0.121421			0.0277764	41.5358	6.26e-10	0.232529
Resident licence, female caribou	-5.47188	0.296949	0.0211552	-0.684607				0.0814881	-0.15714				0.0216338	41.5958	6.07e-10	0.24003
Resident licence, female caribou	-5.58739	0.270164	0.00344557	-0.663853						-0.125784		0.0247374		41.6616	5.87e-10	0.232382
Resident licence, female caribou	-5.4476	0.291515	0.0211203	-0.684556				0.0893252	-0.159727			0.0099264		41.7322	5.67e-10	0.239871
Resident licence, female caribou	-5.4559	0.323759		-0.687285				0.0752089	-0.154125			-0.007641	0.0230445	41.7659	5.58e-10	0.239832
Resident licence, female caribou	-5.828			-0.891704	0.262752			-0.0738462		-0.212261		0.0643438	-0.0699453	41.9198	5.16e-10	0.239653
Resident licence, female caribou	-5.57115			-0.572872						-0.163813				42.4641	3.93e-10	0.20824
Resident licence, female caribou	-5.53301			-0.614484										42.9045	3.16e-10	0.199813
Resident licence, female caribou	-5.62037	0.308995		-0.693417				-0.108897				-0.0382682	0.0482551	43.6183	2.21e-10	0.230081
Resident licence, female caribou	-5.60997	0.298395	0.00637481	-0.687921				-0.0950993					0.0352469	43.8548	1.96e-10	0.229803
Resident licence, female caribou	-5.574	0.29234	0.00314337	-0.692279				-0.0949768				-0.0103487		44.2533	1.61e-10	0.229333
Resident licence, female caribou	-5.59806	0.288173	0.0066736	-0.704512								-0.00927561	0.0344668	45.0951	1.06e-10	0.228341
Resident licence, female caribou	-5.64639	0.293084		-0.64459				-0.140922		-0.13984		-0.0217744	0.0397755	45.5872	8.25e-11	0.235377
Resident licence, female caribou	-5.63806	0.290363	0.000869086	-0.641188				-0.133425		-0.14192			0.0321741	45.6665	7.93e-11	0.235285
Resident licence, female caribou	-5.81782			-0.508058				-0.128527		-0.450972	0.229705	0.0201194	-0.0393956	45.6784	7.88e-11	0.235271
Resident licence, female caribou	-5.67707			-0.509538				0.0446773	-0.136644	-0.42993	0.248591	0.0470818	-0.0664438	45.8618	7.19e-11	0.242602
Resident licence, female caribou	-5.51136	0.292134	0.0159784	-0.65309				0.0307625	-0.137747	-0.101014			0.0214281	45.9055	7.04e-11	0.242551
Resident licence, female caribou	-5.49647	0.311812		-0.653646				0.0280227	-0.135771	-0.102529		0.000819446	0.0200899	46.0068	6.69e-11	0.242434
Resident licence, female caribou	-5.48736	0.28611	0.0165677	-0.651694				0.0403771	-0.140596	-0.101864		0.0158446		46.0082	6.68e-11	0.242432
Resident licence, female caribou	-5.60552	0.28366	-0.00103766	-0.64319				-0.130517		-0.143134		0.00103052		46.0181	6.65e-11	0.234874
Resident licence, female caribou	-5.76103			-0.946187	0.245723			-0.013964				0.0366658	-0.0640994	46.2275	5.99e-11	0.227004
Resident licence, female caribou	-5.58802			-0.551171				-0.0942052		-0.181388				47.7618	2.78e-11	0.209673
Resident licence, female caribou	-5.6106	0.275577	0.00394141	-0.66574						-0.123225		0.0124889	0.0235898	47.99	2.48e-11	0.232563
Resident licence, female caribou	-5.47332	0.29749	0.0208984	-0.685279				0.0801491	-0.156784			-0.00290036	0.0227014	48.0774	2.38e-11	0.240031
Resident licence, female caribou	-5.53982			-0.578552						-0.163553			-0.0337362	48.5315	1.89e-11	0.208743
Resident licence, female caribou	-5.50028			-0.619918									-0.0351438	48.9361	1.55e-11	0.200365
Resident licence, female caribou	-5.57095			-0.571262						-0.164872		0.00597127		48.9392	1.54e-11	0.208249
Resident licence, female caribou	-5.53758			-0.608753				-0.0337409						49.2225	1.34e-11	0.200015
Resident licence, female caribou	-5.53453			-0.619409								-0.0201911		49.2923	1.29e-11	0.19993
Resident licence, female caribou	-5.42091			-0.599719				0.110213	-0.127247					49.7076	1.05e-11	0.207318
Resident licence, female caribou	-5.62366	0.304714	0.00336964	-0.693091				-0.108554				-0.037618	0.0482864	50.0973	8.65e-12	0.230086
Resident licence, female caribou	-5.49315			-0.554872				0.0233332	-0.0977151	-0.153256				50.9701	5.59e-12	0.213621
Resident licence, female caribou	-5.64567	0.294044	-0.000756128	-0.644655				-0.141007		-0.139891		-0.0219178	0.0397714	52.07	3.23e-12	0.235378
Resident licence, female caribou	-5.50947	0.291344	0.0163931	-0.652431				0.0327096	-0.138175	-0.101121		0.00439612	0.0198697	52.3855	2.76e-12	0.242555
Resident licence, female caribou	-5.55812			-0.556865				-0.0925905		-0.180812			-0.031916	53.8735	1.31e-12	0.210122
Resident licence, female caribou	-5.58925			-0.55374				-0.0985044		-0.180059		-0.0128734		54.2102	1.11e-12	0.209715
Resident licence, female caribou	-5.52982			-0.572096						-0.167826		0.0288588	-0.043295	54.858	8.01e-13	0.208932
Resident licence, female caribou	-5.5052			-0.614362				-0.0319975					-0.0345295	55.2714	6.51e-13	0.200546
Resident licence, female caribou	-5.36856			-0.607346				0.118353	-0.133104				-0.0502821	55.2813	6.48e-13	0.20842
Resident licence, female caribou	-5.50133			-0.620595								-0.0025465	-0.0342655	55.418	6.05e-13	0.200367
Resident licence, female caribou	-5.54117			-0.613983				-0.0438839				-0.0295027		55.5178	5.76e-13	0.200245
Resident licence, female caribou	-5.42388			-0.602754				0.103771	-0.126202			-0.0156824		56.1384	4.22e-13	0.207382
Resident licence, female caribou	-5.4457			-0.562839				0.0319995	-0.103564	-0.150806			-0.0446392	56.7371	3.13e-13	0.214481
Resident licence, female caribou	-5.49394			-0.555848				0.0212303	-0.0973954	-0.152608		-0.0049213		57.4481	2.19e-13	0.213627
Resident licence, female caribou	-5.55514			-0.555851				-0.090183		-0.181147		0.0071004	-0.03434	60.3482	5.14e-14	0.210132
Resident licence, female caribou	-5.35915			-0.605282				0.126589	-0.13499			0.0167188	-0.0561286	61.7155	2.6e-14	0.208479
Resident licence, female caribou	-5.51059			-0.61575				-0.0364052				-0.0121503	-0.0303827	61.7283	2.58e-14	0.200578
Resident licence, female caribou	-6.00351	0.344756				-0.666524	0.329329	-0.0850604	-0.157843	-0.559347	0.208256	0.211236		62.0969	2.15e-14	0.231223
Resident licence, female caribou	-5.43179			-0.559131				0.0440061	-0.106114	-0.151914		0.0266442	-0.0539583	63.1004	1.3e-14	0.214625
Resident licence, female caribou	-5.95055	0.354187				-0.641758	0.270592	-0.138171	-0.16107	-0.537438	0.211235			63.2299	1.22e-14	0.222218
Resident licence, female caribou	-6.15002	0.298782				-0.657681	0.341337	-0.270279		-0.59686	0.192696	0.218084		63.7364	9.45e-15	0.221616
Resident licence, female caribou	-6.09722	0.306021				-0.62682	0.278871	-0.329249		-0.577025	0.19607			65.3054	4.31e-15	0.211973
Resident licence, female caribou	-6.08543	0.305036				-0.72469	0.347032			-0.544319	0.173866	0.271203		67.3837	1.53e-15	0.209465
Resident licence, female caribou	-6.03215	0.377249				-0.655352	0.27633	-0.15257	-0.151011	-0.535833	0.207475		0.0706899	68.0342	1.1e-15	0.224212
Resident licence, female caribou	-6.01898	0.314696	0.023874			-0.666319	0.327583	-0.0761279	-0.162027	-0.554062	0.206636	0.214738		68.3369	9.47e-16	0.231509
Resident licence, female caribou	-5.99622	0.342126				-0.665615	0.330129	-0.0823534	-0.158788	-0.56016	0.208585	0.216199	-0.00742038	68.5662	8.45e-16	0.23124
Resident licence, female caribou	-6.19168	0.340063				-0.646949	0.28668	-0.333995		-0.570494	0.192365		0.0914383	68.9252	7.06e-16	0.215415
Resident licence, female caribou	-5.95756	0.340971	0.0106517			-0.642279	0.269727	-0.134454	-0.162923	-0.535265	0.210552			69.6644	4.88e-16	0.222276
Resident licence, female caribou	-6.16594	0.305972				-0.659996	0.339205	-0.274666		-0.594167	0.192126	0.205457	0.018385	70.1353	3.85e-16	0.221716
Resident licence, female caribou	-6.15193	0.295665	0.00238073			-0.657587	0.341166	-0.269863		-0.596409	0.192501	0.218417		70.2173	3.7e-16	0.221618
Resident licence, female caribou	-5.99844	0.333051				-0.822635	0.405117	-0.232619		-0.369691		0.224507		71.5519	1.9e-16	0.20441
Resident licence, female caribou	-6.08953	0.318667	-0.00980795			-0.626991	0.279823	-0.330612		-0.57904	0.196875			71.7435	1.72e-16	0.212027
Resident licence, female caribou	-5.86256	0.374624				-0.840527	0.400755	-0.0707365	-0.136303	-0.322848		0.217226		71.9693	1.54e-16	0.211755
Resident licence, female caribou	-5.95374	0.338029				-0.869194	0.403186			-0.343054		0.267712		72.663	1.09e-16	0.195118
Resident licence, female caribou	-5.80074	0.384114				-0.812883	0.338146	-0.11933	-0.140969	-0.297313				73.5992	6.82e-17	0.201916
Resident licence, female caribou	-5.93837	0.339954				-0.789651	0.339436	-0.289179		-0.345511				73.6739	6.57e-17	0.193873
Resident licence, female caribou	-6.1004	0.281071	0.0180178			-0.722733	0.345474			-0.541344	0.172582	0.273022		73.721	6.42e-17	0.209641
Resident licence, female caribou	-6.07209	0.298536				-0.722168	0.348931			-0.547608	0.174717	0.281394	-0.0166817	73.7949	6.18e-17	0.209552
Resident licence, female caribou	-5.99412	0.32086				-0.704634	0.26728			-0.495368	0.170623			74.2032	5.04e-17	0.19322
Resident licence, female caribou	-6.04073	0.361613	0.0127128			-0.655279	0.274976	-0.148596	-0.153087	-0.532857	0.206612		0.0712228	74.4483	4.46e-17	0.224294
Resident licence, female caribou	-6.01147	0.311905	0.023931			-0.665407	0.328421	-0.0733311	-0.163014	-0.554878	0.206967	0.219863	-0.00770027	74.8052	3.73e-17	0.231526
Resident licence, female caribou	-6.10062					-0.401157	0.296374	-0.27609		-0.661082	0.220484	0.227673		74.8337	3.68e-17	0.200408
Resident licence, female caribou	-6.18683	0.347446	-0.00579575			-0.647138	0.287293	-0.334827		-0.571669	0.192828		0.0910688	75.3924	2.78e-17	0.215435
Resident licence, female caribou	-6.16808	0.302575	0.00260903			-0.659887	0.339007	-0.274225		-0.593662	0.191914	0.205798	0.0184356	76.6157	1.51e-17	0.221719
Resident licence, female caribou	-6.04534	0.376831				-0.809725	0.348194	-0.29536		-0.343861			0.0990164	76.7755	1.39e-17	0.19803
Resident licence, female caribou	-6.04564					-0.366417	0.232234	-0.340623		-0.640367	0.223247			77.1815	1.14e-17	0.189538
Resident licence, female caribou	-6.00028					-0.380813	0.282658	-0.156521	-0.100731	-0.642608	0.23228	0.225227		77.7873	8.4e-18	0.204712
Resident licence, female caribou	-5.89896	0.41071				-0.826037	0.344406	-0.137398	-0.129397	-0.300035			0.0814101	77.8337	8.21e-18	0.204655
Resident licence, female caribou	-6.02141	0.34304				-0.825191	0.402056	-0.23874		-0.366889		0.20693	0.0257034	77.8682	8.07e-18	0.204613
Resident licence, female caribou	-5.88785	0.327851	0.0369371			-0.83786	0.39676	-0.0566138	-0.143311	-0.318145		0.222206		77.87	8.06e-18	0.212457
Resident licence, female caribou	-6.01264	0.311272	0.0164195			-0.820806	0.403308	-0.229845		-0.368457		0.226651		77.9173	7.87e-18	0.204553
Resident licence, female caribou	-5.67364	0.297749				-0.215879		-0.104263	-0.175772	-0.579817	0.275792			77.9518	7.74e-18	0.196587
Resident licence, female caribou	-6.07516	0.349777				-0.719421	0.272838			-0.489477	0.167056		0.0806625	78.4328	6.08e-18	0.195995
Resident licence, female caribou	-5.86734	0.376294				-0.840837	0.40014	-0.072582	-0.135693	-0.322452		0.214051	0.00474801	78.4469	6.04e-18	0.211762
Resident licence, female caribou	-5.97941	0.299146	0.0289406			-0.864251	0.399818			-0.341241		0.270596		78.7691	5.14e-18	0.195582
Resident licence, female caribou	-5.70143	0.181428						-0.200842	-0.152313	-0.648877	0.30088			79.0109	4.56e-18	0.187268
Resident licence, female caribou	-5.86346	0.351533				-0.84169	0.32079			-0.300767				79.122	4.31e-18	0.179032
Resident licence, female caribou	-5.94985	0.336275				-0.868661	0.403794			-0.343889		0.270552	-0.00464354	79.1405	4.27e-18	0.195125
Resident licence, female caribou	-6.03675					-0.461511	0.302771			-0.61239	0.203959	0.285743		79.1529	4.24e-18	0.187091
Resident licence, female caribou	-5.81724	0.354159	0.0240833			-0.811824	0.335099	-0.111464	-0.145347	-0.294057				79.8312	3.02e-18	0.202222
Resident licence, female caribou	-5.9454					-0.348916	0.220378	-0.218595	-0.101647	-0.620213	0.23469			80.0011	2.78e-18	0.194065
Resident licence, female caribou	-6.04804					-0.416176	0.308159	-0.260886		-0.665724	0.220168	0.271091	-0.0658813	80.0976	2.65e-18	0.201897
Resident licence, female caribou	-6.08746	0.275719	0.0174766			-0.720493	0.347322			-0.544492	0.173407	0.282475	-0.0156419	80.1412	2.59e-18	0.209717
Resident licence, female caribou	-5.94233	0.334137	0.00443144			-0.789493	0.33901	-0.288401		-0.345561				80.1486	2.58e-18	0.193883
Resident licence, female caribou	-5.82969	0.150693						-0.37738		-0.676472	0.282552			80.6272	2.03e-18	0.17714
Resident licence, female caribou	-5.99875	0.313508	0.00568436			-0.704241	0.266717			-0.494298	0.170202			80.6723	1.99e-18	0.193238
Resident licence, female caribou	-5.81834							-0.341696		-0.674325	0.274572			80.7563	1.9e-18	0.168778
Resident licence, female caribou	-5.71176							-0.191235	-0.123674	-0.650586	0.28809			81.6853	1.2e-18	0.175807
Resident licence, female caribou	-5.82211	0.24456				-0.177579		-0.317283		-0.621483	0.258643			81.8152	1.12e-18	0.183775
Resident licence, female caribou	-5.91093					-0.398649	0.29738	-0.117084	-0.117532	-0.645961	0.234048	0.284401	-0.0918702	81.9847	1.03e-18	0.207486
Resident licence, female caribou	-5.69033	0.188585						-0.140865	-0.159188	-0.656403	0.303353	0.126264		82.0685	9.88e-19	0.191513
Resident licence, female caribou	-5.95602	0.383213				-0.856322	0.326811			-0.298577			0.0882092	82.8941	6.54e-19	0.182428
Resident licence, female caribou	-5.96639					-0.481445	0.319557			-0.623768	0.205079	0.34157	-0.0957003	82.9968	6.21e-19	0.190365
Resident licence, female caribou	-5.66945	0.288688				-0.188975		-0.0784126	-0.177276	-0.591615	0.280227	0.079353		83.2123	5.58e-19	0.198087
Resident licence, female caribou	-6.05229	0.366682	0.0078571			-0.808813	0.347055	-0.294351		-0.343101			0.0994162	83.2321	5.52e-19	0.198063
Resident licence, female caribou	-5.73108	0.314251				-0.220583		-0.11247	-0.169566	-0.578151	0.274084		0.054078	83.4504	4.95e-19	0.197795
Resident licence, female caribou	-6.06814					-0.363177	0.232508	-0.341626		-0.640412	0.223161		0.023555	83.4593	4.93e-19	0.189792
Resident licence, female caribou	-5.91698	0.37899	0.0255214			-0.824559	0.341007	-0.128649	-0.134017	-0.296899			0.0821511	84.0361	3.69e-19	0.204996
Resident licence, female caribou	-5.69032	0.271164	0.0220716			-0.219925		-0.0976245	-0.179044	-0.574215	0.27398			84.2274	3.36e-19	0.196841
Resident licence, female caribou	-6.03582	0.321092	0.0165816			-0.823277	0.400187	-0.235952		-0.365594		0.209098	0.0258234	84.2321	3.35e-19	0.204758
Resident licence, female caribou	-5.82428	0.156933						-0.330505		-0.683337	0.283501	0.113188		84.3426	3.17e-19	0.180615
Resident licence, female caribou	-5.89163	0.3292	0.0369207			-0.838054	0.396252	-0.058141	-0.142802	-0.317785		0.219715	0.00377024	84.3496	3.16e-19	0.212461
Resident licence, female caribou	-5.74913	0.192627						-0.208204	-0.146761	-0.64881	0.29987		0.0445268	84.8126	2.51e-19	0.188114
Resident licence, female caribou	-6.08419	0.336778	0.0102062			-0.718569	0.271745			-0.487537	0.166311		0.0814735	84.8698	2.43e-19	0.196052
Resident licence, female caribou	-5.81258							-0.298187		-0.679233	0.274816	0.100172		85.0789	2.19e-19	0.17152
Resident licence, female caribou	-5.97648	0.298032	0.0288193			-0.863901	0.400292			-0.341929		0.27264	-0.00339818	85.2492	2.01e-19	0.195586
Resident licence, female caribou	-5.87807	0.329568	0.0167795			-0.839497	0.318554			-0.299033				85.4773	1.8e-19	0.179192
Resident licence, female caribou	-5.7057	0.174281	0.0054245					-0.199673	-0.152995	-0.647912	0.300605			85.4815	1.79e-19	0.187283
Resident licence, female caribou	-5.70113							-0.13732	-0.129026	-0.655482	0.289348	0.110104		85.5734	1.71e-19	0.179071
Resident licence, female caribou	-5.8903	0.168054						-0.379527		-0.674527	0.28236		0.062611	85.7397	1.58e-19	0.178862
Resident licence, female caribou	-5.95121					-0.348306	0.220493	-0.219935	-0.100664	-0.620444	0.234557		0.00512988	86.4749	1.09e-19	0.194077
Resident licence, female caribou	-5.89258	0.269267				-0.185537		-0.31906		-0.616787	0.257529		0.0728397	86.4799	1.09e-19	0.186042
Resident licence, female caribou	-5.84174							-0.34095		-0.673272	0.274079		0.0247468	87.0129	8.34e-20	0.169066
Resident licence, female caribou	-5.82088	0.163899	-0.00985909					-0.378327		-0.678092	0.283179			87.0644	8.13e-20	0.177198
Resident licence, female caribou	-5.8163					-0.0258274		-0.329844		-0.666541	0.270392			87.0674	8.11e-20	0.168997
Resident licence, female caribou	-5.81927	0.236117				-0.152546		-0.295019		-0.632616	0.262448	0.0739779		87.23	7.48e-20	0.185107
Resident licence, female caribou	-5.91987					-0.552783	0.361775	-0.2404		-0.408853		0.233072		87.2991	7.23e-20	0.176902
Resident licence, female caribou	-5.59623	0.44719				-0.82359	0.309417	0.0499122	-0.215747					87.356	7.02e-20	0.176831
Resident licence, female caribou	-5.93864					-0.431232	0.21934			-0.561187	0.199896			87.6401	6.09e-20	0.168269
Resident licence, female caribou	-5.70884					-0.0301347		-0.17668	-0.124467	-0.641574	0.283514			87.937	5.25e-20	0.176099
Resident licence, female caribou	-5.7174							-0.192061	-0.12282	-0.650545	0.287871		0.00519959	88.1589	4.7e-20	0.175819
Resident licence, female caribou	-5.82362	0.24243	0.00171873			-0.177836		-0.317024		-0.621071	0.258476			88.2972	4.39e-20	0.183777
Resident licence, female caribou	-5.70562	0.162291	0.0200927					-0.133877	-0.162111	-0.653281	0.302444	0.130741		88.3783	4.21e-20	0.191728
Resident licence, female caribou	-5.68632	0.18782						-0.13928	-0.159732	-0.656554	0.303474	0.128314	-0.00356936	88.5481	3.87e-20	0.191518
Resident licence, female caribou	-5.63059	0.443143				-0.845934	0.354485	0.0917479	-0.21749			0.16093		88.8994	3.25e-20	0.183025
Resident licence, female caribou	-5.87302					-0.595122	0.360569			-0.38279		0.280405		89.0279	3.04e-20	0.166502
Resident licence, female caribou	-5.97552	0.356108	0.020951			-0.853192	0.323925			-0.296754			0.0896093	89.18	2.82e-20	0.182674
Resident licence, female caribou	-5.73361	0.262144				-0.271292				-0.537218	0.23151			89.2799	2.68e-20	0.166181
Resident licence, female caribou	-5.69127	0.252502	0.0294289			-0.192453		-0.0674167	-0.181828	-0.584955	0.278144	0.0849129		89.3325	2.61e-20	0.198532
Resident licence, female caribou	-5.70419	0.300736				-0.198941		-0.0900104	-0.173285	-0.587307	0.278019	0.0584447	0.0316682	89.4472	2.47e-20	0.198391
Resident licence, female caribou	-5.75276	0.283942	0.0256465			-0.225357		-0.104951	-0.17312	-0.571584	0.271909		0.0562623	89.655	2.22e-20	0.198137
Resident licence, female caribou	-5.85895					-0.516181	0.294903	-0.301657		-0.385024				90.1559	1.73e-20	0.165063
Resident licence, female caribou	-5.85144	0.163416						-0.338129		-0.681476	0.283311	0.0975262	0.0271354	90.6277	1.37e-20	0.180863
Resident licence, female caribou	-5.82555	0.155028	0.00143885					-0.330245		-0.683092	0.283403	0.113481		90.825	1.24e-20	0.180616
Resident licence, female caribou	-5.75624	0.182082	0.00813284					-0.206504	-0.147703	-0.647355	0.299439		0.0452022	91.2672	9.94e-21	0.188149
Resident licence, female caribou	-5.73469									-0.637644	0.265579	0.179499		91.4579	9.03e-21	0.155065
Resident licence, female caribou	-5.64912							-0.116827	-0.137612	-0.657358	0.291544	0.136873	-0.0454696	91.4822	8.92e-21	0.179792
Resident licence, female caribou	-5.79912							-0.29497		-0.680256	0.275089	0.10822	-0.0136614	91.5073	8.81e-21	0.171589
Resident licence, female caribou	-5.81265					0.00111535		-0.298567		-0.679607	0.274996	0.100518		91.5617	8.58e-21	0.17152
Resident licence, female caribou	-5.84261					-0.543773	0.355941	-0.154035	-0.0719334	-0.386256		0.230441		91.968	7e-21	0.179182
Resident licence, female caribou	-5.70107					-0.000526341		-0.137167	-0.129037	-0.655295	0.289248	0.10992		92.0564	6.7e-21	0.179071
Resident licence, female caribou	-5.6818	0.47053				-0.834455	0.313437	0.0340284	-0.205918				0.0723289	92.0565	6.7e-21	0.179071
Resident licence, female caribou	-5.88494	0.175203	-0.00543923					-0.380077		-0.675423	0.282706		0.0620878	92.2086	6.21e-21	0.17888
Resident licence, female caribou	-5.74136	0.243883				-0.216421				-0.569912	0.242332	0.128509		92.2728	6.01e-21	0.170619
Resident licence, female caribou	-5.86484					-0.569063	0.373765	-0.225036		-0.413523		0.278436	-0.0689352	92.4378	5.53e-21	0.178593
Resident licence, female caribou	-5.87889	0.261088				-0.172779		-0.30865		-0.622306	0.259387	0.0337991	0.0600522	92.8015	4.61e-21	0.186243
Resident licence, female caribou	-5.89974	0.260414	0.0073275			-0.186731		-0.317904		-0.615004	0.256822		0.073596	92.9407	4.3e-21	0.186069
Resident licence, female caribou	-5.72058									-0.607689	0.260944			92.9551	4.27e-21	0.144691
Resident licence, female caribou	-5.80314					-0.616506	0.377383			-0.392082		0.33603	-0.0938351	92.9634	4.25e-21	0.169742
Resident licence, female caribou	-5.63049	0.393391	0.0427304			-0.822622	0.30445	0.0598213	-0.22132					93.0334	4.11e-21	0.177844
Resident licence, female caribou	-5.73969	0.124046								-0.639621	0.272409	0.194743		93.2933	3.61e-21	0.161048
Resident licence, female caribou	-5.83814					-0.0230781		-0.330494		-0.666399	0.270386		0.0228524	93.3597	3.49e-21	0.169239
Resident licence, female caribou	-5.82576	0.22667	0.00752857			-0.153303		-0.293381		-0.630829	0.261775	0.075337		93.6898	2.96e-21	0.185136
Resident licence, female caribou	-5.95243					-0.428714	0.219338			-0.561179	0.199799		0.0147964	94.0418	2.48e-21	0.168372
Resident licence, female caribou	-5.6752	0.372176	0.0555345			-0.844076	0.349736	0.108698	-0.225382			0.170234		94.0443	2.48e-21	0.184695
Resident licence, female caribou	-5.79755	0.284084				-0.277179				-0.533329	0.23012		0.0665475	94.2363	2.25e-21	0.168125
Resident licence, female caribou	-5.71168					-0.0298088		-0.177257	-0.124035	-0.641652	0.283455		0.00258787	94.4178	2.06e-21	0.176102
Resident licence, female caribou	-5.7799					-0.50911	0.2904	-0.210194	-0.0745667	-0.361166				94.6575	1.82e-21	0.167589
Resident licence, female caribou	-5.70168	0.161517	0.0201133					-0.132351	-0.162639	-0.653394	0.302547	0.132755	-0.00351149	94.8579	1.65e-21	0.191732
Resident licence, female caribou	-5.64902	0.449005				-0.847204	0.352385	0.0852391	-0.215021			0.15012	0.0174917	95.3039	1.32e-21	0.183123
Resident licence, female caribou	-5.72678	0.264269	0.0297559			-0.202487		-0.0789618	-0.17782	-0.580553	0.27589	0.0639743	0.0321467	95.5601	1.16e-21	0.198845
Resident licence, female caribou	-5.75026	0.239636	0.0181248			-0.273355				-0.533389	0.229969			95.6178	1.13e-21	0.166366
Resident licence, female caribou	-5.72375					-0.107803				-0.584206	0.244107			96.073	8.99e-22	0.149081
Resident licence, female caribou	-5.72369	0.105721								-0.605677	0.266224			96.1072	8.84e-22	0.149037
Resident licence, female caribou	-5.79326	0.396666				-0.84592	0.348028					0.183291		96.1709	8.56e-22	0.157349
Resident licence, female caribou	-5.75615					-0.562991	0.370454	-0.117	-0.0876354	-0.387297		0.287019	-0.0878591	96.3404	7.86e-22	0.181827
Resident licence, female caribou	-5.73823	0.401783				-0.820108	0.291254							96.3691	7.75e-22	0.148696
Resident licence, female caribou	-5.88135					-0.51289	0.295379	-0.302819		-0.385222			0.0231076	96.4396	7.48e-22	0.165318
Resident licence, female caribou	-5.77748					-0.558336	0.274697			-0.339095				96.9253	5.87e-22	0.147972
Resident licence, female caribou	-5.85319	0.160865	0.00193001					-0.337784		-0.681141	0.283181	0.0979045	0.0271897	97.1094	5.35e-22	0.180865
Resident licence, female caribou	-5.73421					-0.054514				-0.620609	0.256298	0.158371		97.1679	5.2e-22	0.156063
Resident licence, female caribou	-5.69153									-0.643387	0.267248	0.20317	-0.0469413	97.2897	4.89e-22	0.155906
Resident licence, female caribou	-5.71912	0.414346	0.0448603			-0.832503	0.307732	0.044485	-0.21155				0.0741319	97.6572	4.07e-22	0.180178
Resident licence, female caribou	-5.7763	0.398421				-0.78831	0.302472	-0.186282						97.6958	3.99e-22	0.155381
Resident licence, female caribou	-5.64917					0.0017184		-0.117372	-0.137615	-0.657948	0.29182	0.13744	-0.0455392	97.9646	3.49e-22	0.179793
Resident licence, female caribou	-5.79916					0.00185406		-0.29558		-0.68088	0.27539	0.108845	-0.0137421	97.9895	3.45e-22	0.17159
Resident licence, female caribou	-5.76642	0.209497	0.0271064			-0.217739				-0.565087	0.240328	0.132224		98.4349	2.76e-22	0.171026
Resident licence, female caribou	-5.76373	0.253793				-0.224741				-0.564674	0.240577	0.114233	0.0241472	98.6032	2.54e-22	0.170812
Resident licence, female caribou	-5.74649									-0.606905	0.260186		0.0271975	99.1606	1.92e-22	0.145054
Resident licence, female caribou	-5.88727	0.24969	0.00914543			-0.173773		-0.30673		-0.620345	0.258596	0.0352111	0.0604683	99.2499	1.84e-22	0.186286
Resident licence, female caribou	-5.81485	0.39491				-0.816074	0.349181	-0.147631				0.158696		99.4386	1.67e-22	0.161481
Resident licence, female caribou	-5.75967	0.0956744	0.0215127							-0.636603	0.271143	0.198305		99.568	1.57e-22	0.161315
Resident licence, female caribou	-5.72135	0.119741								-0.641927	0.272869	0.204266	-0.0197629	99.667	1.49e-22	0.161188
Resident licence, female caribou	-5.83665	0.433573				-0.837851	0.297287						0.0921169	99.8938	1.33e-22	0.152538
Resident licence, female caribou	-5.6919	0.377761	0.0553158			-0.845393	0.347921	0.103034	-0.223138			0.160386	0.0160067	100.462	1e-22	0.184776
Resident licence, female caribou	-5.82237	0.254989	0.0241068			-0.280024				-0.5281	0.228036		0.0693466	100.466	9.99e-23	0.168447
Resident licence, female caribou	-5.88748	0.434238				-0.808726	0.310482	-0.196324					0.101957	100.579	9.45e-23	0.160018
Resident licence, female caribou	-5.79116					-0.507417	0.290464	-0.213442	-0.0725793	-0.361455			0.00972396	101.106	7.26e-23	0.167633
Resident licence, female caribou	-5.7762	0.120927								-0.604426	0.265536		0.0545625	101.539	5.84e-23	0.150404
Resident licence, female caribou	-5.83099	0.343933	0.0405692			-0.841156	0.343752					0.187852		101.92	4.83e-23	0.158294
Resident licence, female caribou	-5.36853	0.324618				-0.314438		-0.0677125	-0.153259	-0.253401				101.967	4.72e-23	0.158233
Resident licence, female caribou	-5.82676	0.410017				-0.850233	0.343775					0.162238	0.0373263	102.274	4.05e-23	0.157838
Resident licence, female caribou	-5.76615	0.363003	0.0303556			-0.817339	0.287506							102.438	3.73e-23	0.149234
Resident licence, female caribou	-5.73905					-0.105574				-0.584158	0.244037		0.0161343	102.461	3.69e-23	0.149205
Resident licence, female caribou	-5.72618	0.102105	0.00269235							-0.605276	0.266076			102.587	3.46e-23	0.149041
Resident licence, female caribou	-5.69373					-0.0517456				-0.62664	0.258277	0.18162	-0.0440026	103.078	2.71e-23	0.156802
Resident licence, female caribou	-5.51468	0.276033				-0.275556		-0.256231		-0.302488				103.17	2.59e-23	0.148282
Resident licence, female caribou	-5.79185					-0.555704	0.274824			-0.339203			0.0151893	103.322	2.4e-23	0.148085
Resident licence, female caribou	-5.79598	0.370423	0.022048			-0.786963	0.299563	-0.183318						103.965	1.74e-23	0.155657
Resident licence, female caribou	-5.79234	0.218622	0.0284887			-0.22689				-0.559104	0.238318	0.116842	0.0265977	104.734	1.18e-23	0.171259
Resident licence, female caribou	-5.87038	0.416392				-0.821336	0.342547	-0.162443				0.121217	0.0593003	105.002	1.03e-23	0.16266
Resident licence, female caribou	-5.84383	0.35372	0.0319466			-0.81394	0.34582	-0.141811				0.163095		105.475	8.16e-24	0.162053
Resident licence, female caribou	-5.46673	0.289265				-0.345398				-0.259676				105.681	7.37e-24	0.136488
Resident licence, female caribou	-5.87097	0.389218	0.0351525			-0.833929	0.29258						0.0946218	105.827	6.85e-24	0.15325
Resident licence, female caribou	-5.74199	0.0928418	0.0206597							-0.638804	0.271607	0.206867	-0.0181886	105.959	6.41e-24	0.161434
Resident licence, female caribou	-5.91189	0.401274	0.0261625			-0.806502	0.306707	-0.192747					0.103435	106.764	4.29e-24	0.160401
Resident licence, female caribou	-5.43384	0.343004				-0.319154		-0.0765345	-0.146767	-0.253326			0.0598935	107.227	3.4e-24	0.159806
Resident licence, female caribou	-5.40717	0.270698	0.0449092			-0.322183		-0.053852	-0.160503	-0.247843				107.595	2.83e-24	0.159333
Resident licence, female caribou	-5.58855	0.301474				-0.283253		-0.258175		-0.299557			0.0749458	107.715	2.67e-24	0.150803
Resident licence, female caribou	-5.48237							-0.318646		-0.347287				107.816	2.53e-24	0.125034
Resident licence, female caribou	-5.86662	0.356592	0.0414773			-0.845235	0.339134					0.166277	0.0388966	107.993	2.32e-24	0.158821
Resident licence, female caribou	-5.78396	0.111184	0.00750616							-0.603091	0.265104		0.0554661	107.996	2.31e-24	0.150437
Resident licence, female caribou	-5.36353	0.319658				-0.300303		-0.0539865	-0.153685	-0.256492		0.04421		108.056	2.25e-24	0.158741
Resident licence, female caribou	-5.51027	0.271373				-0.261932		-0.243528		-0.305578		0.042705		109.285	1.22e-24	0.148762
Resident licence, female caribou	-5.54028	0.244434	0.0254333			-0.279086		-0.252439		-0.300108				109.375	1.16e-24	0.148644
Resident licence, female caribou	-5.48171	0.122966						-0.347817		-0.339213				109.883	9.01e-25	0.130922
Resident licence, female caribou	-5.22277	0.380461				-0.371329		0.0861632	-0.215747					110.31	7.28e-25	0.138933
Resident licence, female caribou	-5.53555	0.312558				-0.351658				-0.256957			0.0699426	110.465	6.74e-25	0.138729
Resident licence, female caribou	-5.46326	0.277884				-0.311254				-0.271189		0.0857657		110.556	6.44e-25	0.138608
Resident licence, female caribou	-5.89968	0.374826	0.0322398			-0.818825	0.339014	-0.156516				0.125862	0.0595386	111.034	5.07e-25	0.163237
Resident licence, female caribou	-5.39055							-0.203057	-0.0920609	-0.319768				111.241	4.57e-25	0.129115
Resident licence, female caribou	-5.49536					-0.103455		-0.271098		-0.339129				111.363	4.3e-25	0.128953
Resident licence, female caribou	-5.50534	0.242665	0.037366			-0.348935				-0.256772				111.55	3.92e-25	0.137299
Resident licence, female caribou	-5.3689	0.144642						-0.211942	-0.113696	-0.304243				111.849	3.37e-25	0.136904
Resident licence, female caribou	-5.47617							-0.278465		-0.351579		0.0960364		112.245	2.77e-25	0.127778
Resident licence, female caribou	-5.48062	0.285074	0.0490879			-0.327581		-0.0615925	-0.154243	-0.247601			0.0641521	112.697	2.21e-25	0.161106
Resident licence, female caribou	-5.40523	0.25838	0.0500194			-0.305719		-0.0350918	-0.161974	-0.25092		0.0540132		113.5	1.48e-25	0.160076
Resident licence, female caribou	-5.43047	0.341519				-0.31693		-0.0742006	-0.147093	-0.253796		0.00646632	0.0574344	113.704	1.33e-25	0.159814
Resident licence, female caribou	-5.62339	0.263264	0.0315186			-0.287718		-0.253443		-0.296399			0.0781905	113.776	1.29e-25	0.151351
Resident licence, female caribou	-5.47513	0.128241						-0.305799		-0.343905		0.105279		113.881	1.22e-25	0.134218
Resident licence, female caribou	-5.51069							-0.317037		-0.347524			0.0290984	113.982	1.16e-25	0.125458
Resident licence, female caribou	-5.59313	0.303893				-0.28678		-0.261346		-0.298333		-0.00976494	0.0786167	114.184	1.05e-25	0.150821
Resident licence, female caribou	-5.40026					-0.108255		-0.149649	-0.0960479	-0.310447				114.546	8.76e-26	0.133337
Resident licence, female caribou	-5.53956	0.139321						-0.348739		-0.337565			0.0596761	115.104	6.62e-26	0.132597
Resident licence, female caribou	-5.44238					-0.165385				-0.297262				115.156	6.45e-26	0.115159
Resident licence, female caribou	-5.27974	0.307847	0.0596674			-0.380449		0.0983586	-0.222482					115.257	6.14e-26	0.140952
Resident licence, female caribou	-5.53941	0.234044	0.0295239			-0.264277		-0.237461		-0.30313		0.0480498		115.399	5.71e-26	0.149241
Resident licence, female caribou	-5.38013							-0.156627	-0.0959676	-0.322712		0.101441		115.436	5.61e-26	0.132157
Resident licence, female caribou	-5.35724	0.150356						-0.16185	-0.118621	-0.308105		0.11252		115.499	5.44e-26	0.140635
Resident licence, female caribou	-5.28703	0.398061				-0.376333		0.0756788	-0.209255				0.0577045	115.657	5.02e-26	0.140426
Resident licence, female caribou	-5.58559	0.259444	0.0437798			-0.355926				-0.253346			0.0749383	116.117	3.99e-26	0.139822
Resident licence, female caribou	-5.50899	0.221087	0.0446037			-0.31251				-0.26866		0.0926139		116.178	3.87e-26	0.139742
Resident licence, female caribou	-5.48861	0.11357	0.00698138					-0.347223		-0.338742				116.345	3.56e-26	0.130951
Resident licence, female caribou	-5.51256	0.297862				-0.327108				-0.265649		0.056868	0.048793	116.408	3.45e-26	0.139439
Resident licence, female caribou	-5.21909	0.377875				-0.364452		0.0943841	-0.216588			0.0236076		116.669	3.03e-26	0.139095
Resident licence, female caribou	-5.41231									-0.32071		0.163186		116.815	2.82e-26	0.112911
Resident licence, female caribou	-5.48848					-0.0856558		-0.249507		-0.343085		0.0702446		116.843	2.78e-26	0.130287
Resident licence, female caribou	-5.40539									-0.299582				117.091	2.45e-26	0.103696
Resident licence, female caribou	-5.38973	0.338841				-0.375668								117.345	2.16e-26	0.112191
Resident licence, female caribou	-5.41995	0.156441						-0.219075	-0.10808	-0.30411			0.046945	117.559	1.94e-26	0.137924
Resident licence, female caribou	-5.40817							-0.205512	-0.0895672	-0.319776			0.0156016	117.635	1.87e-26	0.129234
Resident licence, female caribou	-5.51455					-0.100865		-0.271668		-0.338979			0.020051	117.697	1.81e-26	0.129151
Resident licence, female caribou	-5.38549	0.119116	0.019348					-0.207578	-0.116296	-0.302495				118.166	1.43e-26	0.137123
Resident licence, female caribou	-5.43889					-0.128803				-0.310656		0.116116		118.653	1.12e-26	0.119189
Resident licence, female caribou	-5.46875							-0.276925		-0.351965		0.100351	-0.0073232	118.712	1.09e-26	0.127799
Resident licence, female caribou	-5.47282	0.279822	0.0503236			-0.322088		-0.0550447	-0.155341	-0.248206		0.0167935	0.0578059	119.139	8.81e-27	0.161159
Resident licence, female caribou	-5.39051					-0.0892985		-0.12378	-0.0984141	-0.314014		0.0749986		119.886	6.06e-27	0.134851
Resident licence, female caribou	-5.50143	0.134514						-0.312292		-0.342403		0.0902402	0.0260982	120.18	5.23e-27	0.134461
Resident licence, female caribou	-5.49353	0.102975	0.0189184					-0.302275		-0.342919		0.109395		120.209	5.16e-27	0.134424
Resident licence, female caribou	-5.5097					-0.446195	0.24118	-0.0028391	-0.160074					120.243	5.07e-27	0.125755
Resident licence, female caribou	-5.41023	0.335281				-0.335576		-0.156894						120.252	5.05e-27	0.117033
Resident licence, female caribou	-5.62508	0.264671	0.0312742			-0.289281		-0.25492		-0.295737		-0.00427475	0.0797384	120.256	5.04e-27	0.151354
Resident licence, female caribou	-5.35466	0.321451	0.064159			-0.386194		0.0882809	-0.215844				0.0636439	120.384	4.73e-27	0.142733
Resident licence, female caribou	-5.40845	0.0967272								-0.313889		0.174186		120.454	4.56e-27	0.11676
Resident licence, female caribou	-5.40615					-0.107585		-0.151085	-0.0951418	-0.310166			0.00523715	121.019	3.44e-27	0.13335
Resident licence, female caribou	-5.27755	0.298923	0.0635965			-0.370193		0.112341	-0.224315			0.0368868		121.448	2.78e-27	0.141336
Resident licence, female caribou	-5.3852	0.105806	0.0339901					-0.149712	-0.123813	-0.305477		0.120578		121.485	2.73e-27	0.141287
Resident licence, female caribou	-5.55213	0.124049	0.0115701					-0.347644		-0.33681			0.0608701	121.528	2.67e-27	0.132676
Resident licence, female caribou	-5.54248					-0.468195	0.2855	0.0386074	-0.162695			0.161866		121.532	2.66e-27	0.13267
Resident licence, female caribou	-5.45692					-0.16323				-0.297232			0.0152379	121.554	2.63e-27	0.115274
Resident licence, female caribou	-5.40188	0.0809551								-0.292069				121.607	2.56e-27	0.106388
Resident licence, female caribou	-5.34587							-0.14474	-0.101046	-0.322548		0.118398	-0.0288092	121.685	2.47e-27	0.132467
Resident licence, female caribou	-5.46634	0.363445				-0.383983							0.0761172	121.823	2.3e-27	0.114909
Resident licence, female caribou	-5.56391	0.239374	0.0468885			-0.329229				-0.262532		0.0626226	0.0521122	121.947	2.16e-27	0.140681
Resident licence, female caribou	-5.36334	0.15149						-0.16386	-0.11789	-0.308296		0.109405	0.00532227	121.975	2.13e-27	0.140644
Resident licence, female caribou	-5.29681	0.401903				-0.381737		0.0687999	-0.207976			-0.0166698	0.0642728	122.097	2.01e-27	0.140484
Resident licence, female caribou	-5.67903					-0.512046	0.291965					0.1844		122.123	1.98e-27	0.114503
Resident licence, female caribou	-5.62273					-0.482786	0.234988							122.624	1.54e-27	0.104997
Resident licence, female caribou	-5.44187	0.278856	0.0490845			-0.380987								122.778	1.43e-27	0.113616
Resident licence, female caribou	-5.37949									-0.322941		0.180729	-0.0338715	122.957	1.31e-27	0.113374
Resident licence, female caribou	-5.43867									-0.299806			0.0336287	123.143	1.19e-27	0.104286
Resident licence, female caribou	-5.48354					-0.085507		-0.248467		-0.343313		0.0731733	-0.00485035	123.32	1.09e-27	0.130297
Resident licence, female caribou	-5.38697	0.334499				-0.361787						0.0392459		123.458	1.02e-27	0.112694
Resident licence, female caribou	-5.663					-0.456734	0.246682	-0.187321						123.744	8.81e-28	0.112306
Resident licence, female caribou	-5.44146	0.127219	0.0225008					-0.21377	-0.110923	-0.302864			0.0490133	123.818	8.49e-28	0.138219
Resident licence, female caribou	-5.49343	0.361882				-0.34392		-0.163118					0.082214	124.397	6.35e-28	0.120184
Resident licence, female caribou	-5.41042					-0.127928				-0.312128		0.13171	-0.0291714	124.884	4.98e-28	0.119529
Resident licence, female caribou	-5.70121					-0.484781	0.293189	-0.148227				0.160057		125.253	4.14e-28	0.119032
Resident licence, female caribou	-5.45429					-0.489416	0.301212	0.0729908	-0.178622			0.214036	-0.0890557	125.792	3.16e-28	0.135613
Resident licence, female caribou	-5.45433	0.283991	0.0421806			-0.341547		-0.151297						125.97	2.89e-28	0.118065
Resident licence, female caribou	-5.35842					-0.0887728		-0.112783	-0.103113	-0.313206		0.0912115	-0.0268842	126.166	2.62e-28	0.135119
Resident licence, female caribou	-5.44574	0.0480815	0.0367561							-0.312829		0.181146		126.325	2.42e-28	0.117586
Resident licence, female caribou	-5.52078	0.108727	0.0193734					-0.308743		-0.341311		0.0942855	0.0266212	126.5	2.22e-28	0.134678
Resident licence, female caribou	-5.49634					-0.448179	0.241279	1.21e-05	-0.162114				-0.0120767	126.672	2.04e-28	0.125827
Resident licence, female caribou	-5.40862	0.333859				-0.331672		-0.15287				0.0136658		126.693	2.02e-28	0.117089
Resident licence, female caribou	-5.35601	0.322348	0.0639512			-0.387043		0.0871339	-0.215622			-0.00265095	0.0646773	126.866	1.85e-28	0.142734
Resident licence, female caribou	-5.39662	0.0939855								-0.314638		0.180359	-0.0123202	126.894	1.82e-28	0.116818
Resident licence, female caribou	-5.53258	0.296307	0.0563733			-0.390199							0.0826452	126.943	1.78e-28	0.116753
Resident licence, female caribou	-5.45574	0.0963304								-0.291238			0.055147	127	1.73e-28	0.107876
Resident licence, female caribou	-5.62935					-0.525582	0.302715					0.21864	-0.0625495	127.448	1.38e-28	0.116071
Resident licence, female caribou	-5.19117	0.171828						-0.0502748	-0.185249					127.646	1.25e-28	0.106993
Resident licence, female caribou	-5.41909	0.0581661	0.0170218							-0.291349				127.955	1.07e-28	0.106572
Resident licence, female caribou	-5.39125	0.10692	0.0339925					-0.151769	-0.123073	-0.305473		0.117576	0.00527174	127.961	1.07e-28	0.141297
Resident licence, female caribou	-5.46791	0.364264				-0.385385						-0.00345845	0.0774395	128.304	9.01e-29	0.114912
Resident licence, female caribou	-5.44293	0.268144	0.0533743			-0.364209						0.0479607		128.719	7.32e-29	0.114351
Resident licence, female caribou	-5.63268					-0.481362	0.235044						0.0103074	129.068	6.15e-29	0.105051
Resident licence, female caribou	-5.54989	0.303376	0.0491959			-0.351166		-0.156378					0.087371	129.856	4.15e-29	0.12156
Resident licence, female caribou	-5.1968							-0.0128908	-0.16837					129.898	4.06e-29	0.0949866
Resident licence, female caribou	-5.67924					-0.454436	0.246862	-0.18843					0.0167028	130.123	3.63e-29	0.112447
Resident licence, female caribou	-5.51839	0.373448				-0.359846		-0.179579				-0.0502064	0.101317	130.479	3.04e-29	0.120723
Resident licence, female caribou	-5.66204					-0.496821	0.301546	-0.137848				0.188638	-0.0475617	131.078	2.25e-29	0.119917
Resident licence, female caribou	-5.21346					-0.126214		0.0403463	-0.169259					131.865	1.52e-29	0.101214
Resident licence, female caribou	-5.17994	0.173976						-0.00933673	-0.190501			0.0931268		131.999	1.42e-29	0.109898
Resident licence, female caribou	-5.45391	0.279169	0.0442682			-0.335786		-0.144299				0.0217852		132.35	1.19e-29	0.118204
Resident licence, female caribou	-5.43593	0.046365	0.0364022							-0.313313		0.185964	-0.00983702	132.781	9.61e-30	0.117623
Resident licence, female caribou	-5.48093	0.0673379	0.0222518							-0.290304			0.0579429	133.254	7.58e-30	0.108188
Resident licence, female caribou	-5.53094	0.294899	0.0566653			-0.388439						0.00458186	0.0810152	133.422	6.97e-30	0.116758
Resident licence, female caribou	-5.236	0.181913						-0.0572985	-0.180488				0.0407471	133.543	6.56e-30	0.107794
Resident licence, female caribou	-5.21867	0.133247	0.0293872					-0.0463215	-0.18803					133.738	5.96e-30	0.107528
Resident licence, female caribou	-5.34738					-0.15932								133.844	5.65e-30	0.0804391
Resident licence, female caribou	-5.35882	0.149427						-0.260634						134.047	5.1e-30	0.0892271
Resident licence, female caribou	-5.35324							-0.215043						134.348	4.39e-30	0.0797293
Resident licence, female caribou	-5.18498							0.0257437	-0.173583			0.0848078		134.591	3.89e-30	0.0974598
Resident licence, female caribou	-5.3144													135.476	2.5e-30	0.0689576
Resident licence, female caribou	-5.56716	0.31639	0.0463176			-0.363962		-0.170528				-0.0415919	0.102764	136.066	1.86e-30	0.121928
Resident licence, female caribou	-5.20016							-0.0133146	-0.167947				0.00300203	136.378	1.59e-30	0.0949912
Resident licence, female caribou	-5.37031					-0.123907		-0.160602						136.443	1.54e-30	0.085884
Resident licence, female caribou	-5.20369					-0.112621		0.0605571	-0.17239			0.0569038		137.615	8.57e-31	0.102222
Resident licence, female caribou	-5.21875	0.116651	0.0435408					0.00274407	-0.195653			0.104024		137.652	8.41e-31	0.111027
Resident licence, female caribou	-5.31458	0.109504												138.116	6.67e-31	0.0744125
Resident licence, female caribou	-5.20321					-0.127437		0.0423405	-0.170601				-0.00920748	138.317	6.03e-31	0.101257
Resident licence, female caribou	-5.18619	0.175214						-0.0115643	-0.189698			0.090278	0.00532402	138.474	5.58e-31	0.109909
Resident licence, female caribou	-5.31503											0.109096		138.671	5.05e-31	0.0736263
Resident licence, female caribou	-5.35321	0.151833						-0.231141				0.0793181		138.995	4.3e-31	0.0913619
Resident licence, female caribou	-5.42174	0.165816						-0.264113					0.0635277	139.087	4.1e-31	0.0912339
Resident licence, female caribou	-5.34356					-0.140506						0.0670804		139.217	3.85e-31	0.0819984
Resident licence, female caribou	-5.26992	0.13981	0.0326068					-0.0531017	-0.183236				0.0439448	139.547	3.26e-31	0.108447
Resident licence, female caribou	-5.34784							-0.187773				0.0714326		139.58	3.21e-31	0.0814889
Resident licence, female caribou	-5.35852					-0.15798							0.0114329	140.279	2.26e-31	0.080506
Resident licence, female caribou	-5.37472	0.128858	0.0156327					-0.259427						140.42	2.11e-31	0.0893802
Resident licence, female caribou	-5.31492	0.120399										0.12276		140.51	2.01e-31	0.0801812
Resident licence, female caribou	-5.38057							-0.214732					0.0276456	140.543	1.98e-31	0.0801346
Resident licence, female caribou	-5.13858							0.040949	-0.180357			0.10565	-0.0383992	140.651	1.88e-31	0.0980434
Resident licence, female caribou	-5.34148												0.0271346	141.683	1.12e-31	0.06935
Resident licence, female caribou	-5.36553					-0.114101		-0.147994				0.0431691		142.503	7.44e-32	0.086475
Resident licence, female caribou	-5.38663					-0.121821		-0.161695					0.0167187	142.823	6.34e-32	0.0860278
Resident licence, female caribou	-5.36933	0.124162											0.0553228	143.512	4.49e-32	0.0759497
Resident licence, female caribou	-5.1572					-0.11228		0.0764846	-0.179162			0.0782357	-0.0381547	143.683	4.12e-32	0.102791
Resident licence, female caribou	-5.22514	0.117878	0.0435633					0.000565864	-0.194863			0.101128	0.0054698	144.127	3.3e-32	0.111038
Resident licence, female caribou	-5.33778	0.0798648	0.0225733											144.36	2.94e-32	0.0747506
Resident licence, female caribou	-5.39698	0.161958						-0.242177				0.0561551	0.0424313	144.977	2.16e-32	0.0920578
Resident licence, female caribou	-5.29829											0.117	-0.0167678	145.069	2.06e-32	0.0737476
Resident licence, female caribou	-5.37912	0.117735	0.0259592					-0.22664				0.0851442		145.182	1.95e-32	0.091773
Resident licence, female caribou	-5.44524	0.138755	0.0209481					-0.262381					0.0658049	145.375	1.77e-32	0.0915059
Resident licence, female caribou	-5.32923					-0.140115						0.074168	-0.0142246	145.638	1.55e-32	0.0820851
Resident licence, female caribou	-5.34945							-0.188076				0.0705784	0.00155995	146.062	1.25e-32	0.0814898
Resident licence, female caribou	-5.35528	0.0693839	0.0393747									0.131067		146.294	1.12e-32	0.0811643
Resident licence, female caribou	-5.3266	0.122949										0.117324	0.0118226	146.953	8.04e-33	0.0802379
Resident licence, female caribou	-5.36764					-0.114078		-0.148482				0.0420297	0.00202824	148.985	2.91e-33	0.0864764
Resident licence, female caribou	-5.40211	0.0879109	0.0283949										0.0590391	149.627	2.11e-33	0.0764702
Resident licence, female caribou	-5.42442	0.126972	0.0267413					-0.237553				0.0620071	0.0431866	151.148	9.87e-34	0.0924916
Resident licence, female caribou	-5.37014	0.0716722	0.0399734									0.124675	0.0144306	152.718	4.5e-34	0.0812468
Resident licence	-4.9403	0.215028		-0.807404	0.218514					-0.346949	0.165705			0	0.526514	0.314682
Resident licence	-4.84893	0.254741		-0.841479	0.251269			0.14561	-0.149341	-0.308226	0.181148			1.24192	0.282964	0.326858
Resident licence	-4.94739	0.21987		-0.791092	0.21544			-0.0540975		-0.356358	0.169451			5.9553	0.0268061	0.315234
Resident licence	-4.91228	0.253426	-0.0306302	-0.811015	0.218572					-0.35072	0.16659			5.98885	0.0263601	0.315199
Resident licence	-4.94026	0.213283		-0.812193	0.217896					-0.344	0.164971	-0.0202841		6.3661	0.0218287	0.314804
Resident licence	-4.9423	0.215737		-0.807033	0.218297					-0.346833	0.16568		0.00244226	6.48068	0.0206134	0.314684
Resident licence	-4.66759	0.266293		-0.983956	0.309963			0.210054	-0.161498					6.93375	0.0164348	0.307377
Resident licence	-4.8024	0.217947		-0.898311	0.266576					-0.14782				7.42209	0.0128743	0.299955
Resident licence	-4.83167	0.249547		-0.845166	0.253592			0.149375	-0.151719	-0.308435	0.181641		-0.0192484	7.57392	0.0119331	0.327013
Resident licence	-4.85037	0.253651		-0.843449	0.250128			0.138269	-0.148281	-0.306921	0.18083	-0.0179881		7.64024	0.0115439	0.326945
Resident licence	-4.84036	0.267872	-0.0106357	-0.842495	0.251189			0.144235	-0.147796	-0.309789	0.181353			7.66509	0.0114014	0.32692
Resident licence	-4.77329	0.240551		-0.948653	0.268126									8.03732	0.00946517	0.292315
Resident licence	-4.93369			-0.733181	0.211802					-0.385401	0.170125			10.3078	0.00304162	0.296859
Resident licence	-4.70466	0.250634		-0.945532	0.304293			0.166814	-0.138176	-0.0944153				10.8747	0.00229088	0.310064
Resident licence	-4.91968	0.257856	-0.03031	-0.794908	0.215678			-0.0534647		-0.359916	0.170286			11.9554	0.00133452	0.31574
Resident licence	-4.94875	0.217932		-0.795515	0.213666			-0.065335		-0.35355	0.16908	-0.0339017		12.1343	0.00122033	0.315553
Resident licence	-4.91103	0.252948	-0.0318997	-0.816594	0.217826					-0.347439	0.165764	-0.0236067		12.3148	0.00111505	0.315364
Resident licence	-4.95036	0.220927		-0.790372	0.215037			-0.0543294		-0.356046	0.169391		0.00372118	12.4326	0.00105127	0.315241
Resident licence	-4.91257	0.25351	-0.0306178	-0.810967	0.218549					-0.350709	0.166583		0.000340831	12.4719	0.00103078	0.315199
Resident licence	-4.94946	0.216109		-0.81178	0.216687					-0.342565	0.164639	-0.0260434	0.0113376	12.8051	0.000872592	0.31485
Resident licence	-4.67001	0.264386		-0.985439	0.307515			0.199322	-0.159728			-0.0267145		13.2252	0.000707298	0.30758
Resident licence	-4.6542	0.262251		-0.986395	0.311646			0.212685	-0.163122				-0.014568	13.3298	0.000671255	0.307469
Resident licence	-4.66646	0.267876	-0.00126952	-0.98413	0.30995			0.209958	-0.161352					13.416	0.000642942	0.307378
Resident licence	-4.77796	0.250622	-0.0260237	-0.901888	0.266898					-0.149939				13.5507	0.000601067	0.300334
Resident licence	-4.8026	0.215344		-0.903892	0.264599					-0.145126		-0.0300023		13.649	0.000572234	0.300229
Resident licence	-4.80443	0.219781		-0.893255	0.266268			-0.0206201		-0.149727				13.8292	0.000522924	0.300036
Resident licence	-4.8057	0.2191		-0.897789	0.266263					-0.147671			0.00393538	13.8989	0.000505024	0.299961
Resident licence	-4.77425	0.235728		-0.954613	0.265068							-0.0443738		13.9482	0.000492709	0.292934
Resident licence	-4.82228	0.263248	-0.0111976	-0.846274	0.253536			0.148026	-0.150129	-0.310099	0.181868		-0.0196446	13.9906	0.000482379	0.327082
Resident licence	-4.83539	0.249867		-0.845585	0.252611			0.145026	-0.150753	-0.307737	0.181375	-0.00904501	-0.0159192	14.0401	0.000470586	0.327031
Resident licence	-4.84092	0.268177	-0.0118512	-0.844708	0.249941			0.136158	-0.14648	-0.308544	0.181027	-0.01949		14.0494	0.000468404	0.327021
Resident licence	-4.75487	0.263893	-0.0187301	-0.951112	0.267925									14.3377	0.000405519	0.292513
Resident licence	-4.7814	0.243259		-0.947284	0.267294								0.00963463	14.4814	0.000377407	0.292357
Resident licence	-4.77297	0.24006		-0.949553	0.268235			0.0044164						14.517	0.000370748	0.292319
Resident licence	-4.74051	0.206592		-0.484462						-0.42119	0.22564			14.9717	0.00029536	0.291827
Resident licence	-4.89258			-0.747535	0.216984					-0.385053	0.170214		-0.0510149	15.6379	0.000211682	0.298097
Resident licence	-4.93338			-0.746233	0.210387					-0.377457	0.168417	-0.046422		16.1938	0.000160314	0.297501
Resident licence	-4.93561			-0.728321	0.211024			-0.0141257		-0.388263	0.171099			16.754	0.000121151	0.296899
Resident licence	-4.86341			-0.759924	0.23667			0.136853	-0.106036	-0.355655	0.179157			17.1259	0.000100594	0.303438
Resident licence	-4.70626	0.249231		-0.947114	0.30219			0.15794	-0.136867	-0.0931626		-0.0225331		17.2232	9.58e-05	0.310206
Resident licence	-4.69158	0.2467		-0.948036	0.305932			0.169342	-0.139749	-0.0943428			-0.0142533	17.2738	9.34e-05	0.310153
Resident licence	-4.69861	0.25968	-0.00731871	-0.946288	0.304219			0.165806	-0.137087	-0.0952988				17.3296	9.09e-05	0.310094
Resident licence	-4.91945	0.257981	-0.0321605	-0.799848	0.213753			-0.0656092		-0.357009	0.169911	-0.0372048		18.0745	6.26e-05	0.316121
Resident licence	-4.79266			-0.820391	0.259726					-0.186224				18.1496	6.03e-05	0.281288
Resident licence	-4.92108	0.258202	-0.0302082	-0.794529	0.215471			-0.0535937		-0.359672	0.170231		0.00169594	18.4373	5.22e-05	0.315741
Resident licence	-4.96512	0.223087		-0.793639	0.211323			-0.0699443		-0.35178	0.168843	-0.0447719	0.0193703	18.4916	5.08e-05	0.315684
Resident licence	-4.91949	0.255171	-0.031648	-0.816247	0.216775					-0.346093	0.165449	-0.0287833	0.0101265	18.7627	4.44e-05	0.315401
Resident licence	-4.6642	0.262965		-0.986101	0.308444			0.201695	-0.160606			-0.0233363	-0.00592792	19.6967	2.78e-05	0.307592
Resident licence	-4.66724	0.268297	-0.00316246	-0.985883	0.30744			0.198926	-0.159337			-0.0271463		19.7029	2.77e-05	0.307586
Resident licence	-4.77637	0.250076	-0.027919	-0.908124	0.264709					-0.147137		-0.0330568		19.7253	2.74e-05	0.300664
Resident licence	-4.65271	0.264275	-0.00163448	-0.986626	0.311634			0.212576	-0.162938				-0.0146165	19.8114	2.63e-05	0.307471
Resident licence	-4.80557	0.217637		-0.896868	0.263529			-0.0321376		-0.147257		-0.0363219		19.9602	2.44e-05	0.300413
Resident licence	-4.78009	0.252242	-0.0258827	-0.896971	0.266638			-0.0200091		-0.151769				19.9621	2.44e-05	0.300411
Resident licence	-4.81713	0.219763		-0.902948	0.262422					-0.143283		-0.0392111	0.0175871	20.0256	2.36e-05	0.300343
Resident licence	-4.78	0.251167	-0.025918	-0.901583	0.266724					-0.149849			0.00230104	20.0317	2.35e-05	0.300336
Resident licence	-4.79984	0.242756		-0.952057	0.261353							-0.0598907	0.0302322	20.1121	2.26e-05	0.293279
Resident licence	-4.75305	0.262326	-0.0216008	-0.957615	0.264648							-0.0468278		20.189	2.17e-05	0.293196
Resident licence	-4.75649	0.214867		-0.467401				-0.079069		-0.433733	0.231985			20.2871	2.07e-05	0.29309
Resident licence	-4.80813	0.221085		-0.892607	0.265908			-0.0208526		-0.149544			0.00439241	20.3044	2.05e-05	0.300044
Resident licence	-4.77494	0.236674		-0.952715	0.264596			-0.0103292				-0.0463702		20.4134	1.94e-05	0.292953
Resident licence	-4.82618	0.26427	-0.0117266	-0.846793	0.252389			0.142891	-0.148937	-0.309351	0.181572	-0.0105758	-0.0157738	20.4507	1.91e-05	0.327105
Resident licence	-4.76254	0.265876	-0.0183606	-0.949868	0.267199								0.00865234	20.7895	1.61e-05	0.292547
Resident licence	-4.75445	0.263414	-0.0187882	-0.952121	0.268036			0.00496414						20.8165	1.59e-05	0.292517
Resident licence	-4.78104	0.242815		-0.948056	0.267391			0.00374638					0.00953229	20.9621	1.48e-05	0.29236
Resident licence	-4.71233	0.244495	-0.0301142	-0.487347						-0.423577	0.226599			20.97	1.47e-05	0.292351
Resident licence	-4.79369			-0.784488	0.247591			0.154135	-0.119352	-0.351484	0.181037		-0.076248	21.126	1.36e-05	0.306078
Resident licence	-4.76288	0.213703		-0.484034						-0.419218	0.224969		0.0247036	21.206	1.31e-05	0.292096
Resident licence	-4.74068	0.204233		-0.49214						-0.416081	0.223833	-0.0271266		21.2437	1.28e-05	0.292055
Resident licence	-4.67378	0.237955		-0.466235				0.0519144	-0.0971098	-0.409449	0.249513			21.5929	1.08e-05	0.298664
Resident licence	-4.8989			-0.75211	0.215445					-0.381121	0.169375	-0.0237056	-0.0431008	21.9897	8.84e-06	0.298238
Resident licence	-4.89443			-0.742746	0.216191			-0.0138638		-0.387859	0.171152		-0.0509914	22.0856	8.43e-06	0.298135
Resident licence	-4.93797			-0.737356	0.208499			-0.0320859		-0.382956	0.170517	-0.0536717		22.4999	6.85e-06	0.297691
Resident licence	-4.86681			-0.766389	0.234257			0.119656	-0.103867	-0.351867	0.178465	-0.0426363		23.1505	4.95e-06	0.303926
Resident licence	-4.75148			-0.833959	0.264462					-0.185698			-0.050341	23.5033	4.15e-06	0.282528
Resident licence	-4.75183			-0.875657	0.256859									23.5237	4.1e-06	0.268138
Resident licence	-4.69901	0.26012	-0.00887066	-0.948097	0.301991			0.156288	-0.135478	-0.0941788		-0.0237065		23.665	3.82e-06	0.31025
Resident licence	-4.69898	0.247385		-0.948149	0.303432			0.160987	-0.137942	-0.0933096		-0.0181934	-0.00758417	23.6875	3.78e-06	0.310226
Resident licence	-4.68495	0.256166	-0.00772504	-0.948861	0.305874			0.168336	-0.138621	-0.0952755			-0.014516	23.7256	3.71e-06	0.310186
Resident licence	-4.73947			-0.428672						-0.447154	0.226614			23.7355	3.69e-06	0.275123
Resident licence	-4.79289			-0.83383	0.256144					-0.179384		-0.0566693		23.7428	3.68e-06	0.282265
Resident licence	-4.93528	0.262376	-0.0317631	-0.798109	0.211598			-0.0700073		-0.355235	0.169659	-0.047524	0.0182673	24.4457	2.59e-06	0.316238
Resident licence	-4.79052			-0.825775	0.259857			0.0190347		-0.183888				24.5659	2.44e-06	0.281361
Resident licence	-4.77934	0.252496	-0.0279887	-0.901064	0.263703			-0.0322834		-0.149275		-0.0393544		26.0345	1.17e-06	0.30085
Resident licence	-4.71859			-0.857924	0.286225			0.158714	-0.0966072	-0.14722				26.0637	1.15e-06	0.286818
Resident licence	-4.65887			-0.913864	0.29195			0.235751	-0.130206					26.0941	1.14e-06	0.27968
Resident licence	-4.79057	0.253948	-0.0276131	-0.907242	0.262651					-0.145317		-0.0419123	0.0168179	26.1109	1.13e-06	0.300768
Resident licence	-4.76027	0.212362		-0.477436				-0.0957341		-0.427598	0.230212	-0.0482757		26.1524	1.1e-06	0.293757
Resident licence	-4.66159	0.266782	-0.00307094	-0.986524	0.308359			0.201283	-0.160213			-0.0237985	-0.00584879	26.1747	1.09e-06	0.307598
Resident licence	-4.82419	0.223429		-0.894971	0.260864			-0.03708		-0.145604		-0.0487197	0.0216775	26.2855	1.03e-06	0.300581
Resident licence	-4.72942	0.250629	-0.0285236	-0.470362				-0.0773172		-0.43567	0.232785			26.3368	1.01e-06	0.293558
Resident licence	-4.77868	0.269025	-0.0213651	-0.955152	0.26103							-0.0622762	0.0299328	26.3586	9.95e-07	0.293535
Resident licence	-4.78257	0.252912	-0.0257538	-0.896559	0.266423			-0.0201703		-0.151651			0.00278204	26.4421	9.54e-07	0.300414
Resident licence	-4.7802	0.222354		-0.466763				-0.0799182		-0.431761	0.231363		0.0259549	26.4958	9.29e-07	0.293386
Resident licence	-4.80296	0.244911		-0.948547	0.260309			-0.0183593				-0.0646282	0.0323864	26.5407	9.08e-07	0.293338
Resident licence	-4.75373	0.263293	-0.0216143	-0.955705	0.264186			-0.0103115				-0.0488053		26.6542	8.58e-07	0.293215
Resident licence	-4.77716	0.214345		-0.49683						-0.40913	0.221372	-0.0468983	0.0403361	27.1685	6.64e-07	0.292659
Resident licence	-4.71076	0.24413	-0.0319908	-0.496155						-0.417901	0.224584	-0.030882		27.182	6.59e-07	0.292645
Resident licence	-4.73369	0.248906	-0.0285619	-0.486863						-0.421692	0.225953		0.0219879	27.2567	6.35e-07	0.292564
Resident licence	-4.76204	0.26543	-0.0184167	-0.950762	0.267303			0.00433391					0.00852049	27.2693	6.31e-07	0.29255
Resident licence	-4.79305			-0.784547	0.247866			0.155194	-0.119602	-0.351829	0.181108	0.001955	-0.0768701	27.6082	5.33e-07	0.306078
Resident licence	-4.67833	0.235789		-0.47404				0.0358201	-0.0951714	-0.404708	0.247616	-0.0386811		27.6835	5.13e-07	0.299085
Resident licence	-4.6626	0.254606	-0.0136066	-0.467612				0.0503007	-0.0949985	-0.410739	0.249548			27.9781	4.43e-07	0.298769
Resident licence	-4.68681	0.241451		-0.466029				0.0499251	-0.0958141	-0.408737	0.248853		0.013172	28.0068	4.36e-07	0.298738
Resident licence	-4.75405			-0.890619	0.251719							-0.0822004		28.0803	4.21e-07	0.270291
Resident licence	-4.90404			-0.745139	0.213724			-0.0241245		-0.385043	0.170874	-0.0302549	-0.0409033	28.3747	3.63e-07	0.298344
Resident licence	-4.71018			-0.889077	0.262207								-0.0514299	28.8301	2.89e-07	0.269454
Resident licence	-4.74748			-0.890398	0.258579			0.0618932						29.2883	2.3e-07	0.268942
Resident licence	-4.73972			-0.445488						-0.436414	0.223311	-0.0521501		29.4548	2.12e-07	0.275969
Resident licence	-4.7617			-0.839338	0.261019					-0.181454		-0.0358479	-0.0381039	29.691	1.88e-07	0.282852
Resident licence	-4.71394			-0.432055						-0.448245	0.227341		-0.0282706	29.8709	1.72e-07	0.275508
Resident licence	-4.58803			-0.935944	0.303281			0.24892	-0.141894				-0.0783724	29.9151	1.68e-07	0.282606
Resident licence	-4.74926			-0.83928	0.264547			0.0189602		-0.183045			-0.0503804	29.9201	1.68e-07	0.2826
Resident licence	-4.74699			-0.419638				-0.0351824		-0.454085	0.229625			29.9795	1.63e-07	0.275388
Resident licence	-4.69197	0.258194	-0.00877532	-0.949096	0.303204			0.159295	-0.13654	-0.0943155		-0.0194346	-0.007422	30.1301	1.51e-07	0.310269
Resident licence	-4.79276			-0.834029	0.256146			0.000954281		-0.179338		-0.0564538		30.2257	1.44e-07	0.282265
Resident licence	-4.65232			-0.880395	0.296268			0.173511	-0.108106	-0.141961			-0.0710298	30.3633	1.34e-07	0.289195
Resident licence	-4.66467			-0.919266	0.287154			0.211811	-0.12659			-0.0580352		31.703	6.87e-08	0.280642
Resident licence	-4.80925	0.226167		-0.481658				-0.1068		-0.420105	0.227866	-0.0762989	0.0515993	31.7373	6.76e-08	0.294727
Resident licence	-4.72226			-0.863947	0.28253			0.140389	-0.0942767	-0.144122		-0.0472722		31.9763	6e-08	0.28744
Resident licence	-4.73091	0.251155	-0.0311492	-0.481149				-0.0947774		-0.42924	0.230925	-0.051579		32.1192	5.58e-08	0.294315
Resident licence	-4.79771	0.257704	-0.0276501	-0.899249	0.261171			-0.0371206		-0.147621		-0.0514171	0.0209628	32.3699	4.92e-08	0.301008
Resident licence	-4.7524	0.255453	-0.0269251	-0.469646				-0.0782686		-0.43378	0.232184		0.0234945	32.5959	4.4e-08	0.2938
Resident licence	-4.78182	0.271201	-0.0213741	-0.951632	0.260011			-0.0183444				-0.066999	0.0321032	32.7872	4e-08	0.293593
Resident licence	-4.7469	0.251938	-0.0304969	-0.500513						-0.411135	0.222181	-0.0497506	0.0384368	33.1584	3.32e-08	0.293192
Resident licence	-4.71273	0.243678		-0.47691				0.0234304	-0.091012	-0.400603	0.245018	-0.0566109	0.0328522	33.8147	2.39e-08	0.299462
Resident licence	-4.66523	0.255447	-0.0161909	-0.476038				0.0331346	-0.0925786	-0.405974	0.24755	-0.0407538		34.0289	2.15e-08	0.299232
Resident licence	-4.69288			-0.417022				0.0534399	-0.061607	-0.438686	0.240151			34.2387	1.93e-08	0.277848
Resident licence	-4.73038			-0.895256	0.255537							-0.0666387	-0.0286685	34.2593	1.91e-08	0.27063
Resident licence	-4.75127			-0.898062	0.25331			0.0372848				-0.0739427		34.3233	1.85e-08	0.270559
Resident licence	-4.67527	0.257141	-0.0129966	-0.467366				0.0484935	-0.0938884	-0.410017	0.248935		0.0123094	34.401	1.78e-08	0.298833
Resident licence	-4.706			-0.903971	0.264057			0.0620802					-0.0514064	34.5935	1.62e-08	0.270258
Resident licence	-4.75221			-0.434881				-0.0583165		-0.445014	0.227407	-0.0660869		35.3402	1.12e-08	0.27663
Resident licence	-4.72749			-0.444971						-0.438374	0.224117	-0.0452278	-0.0135758	35.8698	8.56e-09	0.276044
Resident licence	-4.72129			-0.42292				-0.0357296		-0.45529	0.230391		-0.0285655	36.1077	7.6e-09	0.275781
Resident licence	-4.76023			-0.841317	0.261281			0.00811847		-0.180735		-0.0337458	-0.0387921	36.1631	7.39e-09	0.282864
Resident licence	-4.59447			-0.935812	0.301167			0.241729	-0.140143			-0.0150469	-0.0729088	36.3502	6.73e-09	0.282659
Resident licence	-4.65495			-0.880462	0.295325			0.170396	-0.107367	-0.141471		-0.00654661	-0.0687064	36.8374	5.28e-09	0.289205
Resident licence	-4.77997	0.262306	-0.0293276	-0.485065				-0.105716		-0.421862	0.228614	-0.0787351	0.0498689	37.7645	3.32e-09	0.295218
Resident licence	-4.43818	0.222828		-0.545394										38.4016	2.41e-09	0.251298
Resident licence	-4.46745	0.204122		-0.50046						-0.138815				38.4637	2.34e-09	0.258613
Resident licence	-4.70002			-0.430751				0.0282903	-0.0587621	-0.430857	0.237545	-0.0600451		39.8058	1.2e-09	0.278858
Resident licence	-4.65076			-0.421249				0.0604802	-0.0674691	-0.439126	0.242549		-0.0414515	39.9966	1.09e-09	0.278648
Resident licence	-4.69958	0.2628	-0.0157968	-0.478817				0.0208682	-0.0885485	-0.401861	0.24498	-0.0585605	0.032523	40.167	9.98e-10	0.299602
Resident licence	-4.72398			-0.904634	0.257992			0.0435513				-0.0549898	-0.0325781	40.4204	8.79e-10	0.270989
Resident licence	-4.74375			-0.434878				-0.05678		-0.446067	0.227835	-0.0610825	-0.00902565	41.7936	4.43e-10	0.276663
Resident licence	-4.44645	0.215196		-0.56289								-0.0725831		43.3083	2.08e-10	0.253101
Resident licence	-4.47304	0.199049		-0.517283						-0.133374		-0.059344		43.9197	1.53e-10	0.259777
Resident licence	-4.47431	0.233309		-0.545063									0.0380073	44.3008	1.26e-10	0.251967
Resident licence	-4.49795	0.213432		-0.500332						-0.137339			0.0324844	44.5214	1.13e-10	0.259095
Resident licence	-4.41635	0.250335	-0.0219778	-0.547618										44.63	1.07e-10	0.25159
Resident licence	-4.44441	0.233747	-0.023373	-0.502738						-0.139311				44.6569	1.06e-10	0.258942
Resident licence	-4.43831	0.222972		-0.544896				-0.00153344						44.8843	9.44e-11	0.251299
Resident licence	-4.46938	0.20602		-0.496682				-0.0174939		-0.139987				44.8907	9.41e-11	0.258677
Resident licence	-4.67175			-0.430233				0.038845	-0.0631758	-0.432992	0.239701	-0.0453223	-0.0261624	46.0503	5.27e-11	0.279121
Resident licence	-4.4685			-0.443411						-0.169127				46.7171	3.78e-11	0.241718
Resident licence	-4.35626	0.235274		-0.529774				0.109274	-0.0829381					47.1887	2.98e-11	0.256067
Resident licence	-4.52082	0.232967		-0.570236								-0.109234	0.0744898	47.8712	2.12e-11	0.255291
Resident licence	-4.5352	0.21524		-0.525513						-0.127457		-0.0911189	0.0634419	49.0303	1.19e-11	0.261328
Resident licence	-4.42002	0.248603	-0.0270336	-0.566239								-0.0758915		49.4072	9.84e-12	0.25354
Resident licence	-4.44988	0.218142		-0.559473				-0.0283125				-0.0784365		49.6567	8.68e-12	0.253255
Resident licence	-4.4108	0.21753		-0.49543				0.0581869	-0.0539943	-0.115349				49.7743	8.19e-12	0.260488
Resident licence	-4.44616	0.233674	-0.0276412	-0.520775						-0.133699		-0.0628752		49.9988	7.32e-12	0.260234
Resident licence	-4.47831	0.202689		-0.510781				-0.0407746		-0.134955		-0.0678776		50.125	6.87e-12	0.260091
Resident licence	-4.43412			-0.497324										50.2054	6.6e-12	0.230068
Resident licence	-4.4532	0.257177	-0.0194169	-0.547106									0.0360993	50.5869	5.45e-12	0.252192
Resident licence	-4.47515	0.239697	-0.0211613	-0.502454						-0.137864			0.0304204	50.769	4.98e-12	0.259362
Resident licence	-4.47463	0.233668		-0.544251				-0.0032361					0.0380339	50.7821	4.95e-12	0.251969
Resident licence	-4.50027	0.215509		-0.496308				-0.0186003		-0.138541			0.0327697	50.9411	4.57e-12	0.259167
Resident licence	-4.44652	0.235001	-0.0229951	-0.499257				-0.015842		-0.140363				51.094	4.23e-12	0.258994
Resident licence	-4.41632	0.250343	-0.0220041	-0.547375				-0.000124085						51.1132	4.19e-12	0.25159
Resident licence	-4.47583			-0.470396						-0.159613		-0.0830758		51.2369	3.94e-12	0.243991
Resident licence	-4.37001	0.231001		-0.54329				0.0804809	-0.0795918			-0.0705396		52.3014	2.31e-12	0.257625
Resident licence	-4.44949			-0.445616						-0.169389			-0.0202536	53.0229	1.61e-12	0.241924
Resident licence	-4.46555			-0.45015				0.0252433		-0.167062				53.0812	1.57e-12	0.241856
Resident licence	-4.38524	0.242971		-0.530296				0.105604	-0.0807238				0.0280672	53.3577	1.36e-12	0.256425
Resident licence	-4.44575			-0.526183								-0.104854		53.464	1.29e-12	0.233855
Resident licence	-4.34748	0.24768	-0.0100447	-0.531073				0.108396	-0.08161					53.619	1.2e-12	0.256127
Resident licence	-4.53129	0.238716		-0.5647				-0.046179				-0.121582	0.0794306	54.0057	9.87e-13	0.255687
Resident licence	-4.49544	0.263145	-0.0246303	-0.573244								-0.111944	0.0731809	54.0371	9.71e-13	0.255652
Resident licence	-4.5481	0.221546		-0.517375				-0.05564		-0.129413		-0.106071	0.0692588	55.0066	5.98e-13	0.261901
Resident licence	-4.42172	0.214174		-0.508756				0.032994	-0.0517378	-0.11176		-0.0642922		55.1396	5.6e-13	0.26175
Resident licence	-4.50899	0.246867	-0.0255081	-0.528647						-0.127838		-0.0939521	0.0620062	55.171	5.51e-13	0.261715
Resident licence	-4.42361	0.251057	-0.0267132	-0.562823				-0.0272824				-0.081443		55.7649	4.09e-13	0.253683
Resident licence	-4.43883	0.225003		-0.495333				0.0546142	-0.0519267	-0.115128			0.0273584	55.9578	3.72e-13	0.260826
Resident licence	-4.42857			-0.508967				0.0547255						56.1191	3.43e-13	0.230738
Resident licence	-4.39856	0.235688	-0.0147336	-0.497103				0.0562811	-0.0517078	-0.116488				56.1442	3.39e-13	0.260616
Resident licence	-4.45172	0.236628	-0.0271544	-0.514271				-0.0396459		-0.135201		-0.0710436		56.2189	3.26e-13	0.260531
Resident licence	-4.41513			-0.499191									-0.0201315	56.5123	2.82e-13	0.230275
Resident licence	-4.45344	0.25743	-0.0193809	-0.546885				-0.00191175					0.0361183	57.0693	2.13e-13	0.252193
Resident licence	-4.47773	0.24113	-0.0207571	-0.498689				-0.0171242		-0.138968			0.0307452	57.1984	2e-13	0.259423
Resident licence	-4.44419	0.247021		-0.549271				0.0568489	-0.0724731			-0.106357	0.0654137	57.3782	1.83e-13	0.259219
Resident licence	-4.48444			-0.470842						-0.159138		-0.0877257	0.00878416	57.6926	1.56e-13	0.244023
Resident licence	-4.47636			-0.469707				-0.00382425		-0.159956		-0.0839549		57.7174	1.54e-13	0.243994
Resident licence	-4.35716	0.249428	-0.0150877	-0.545515				0.0785722	-0.0775542			-0.0725431		58.6659	9.6e-14	0.257759
Resident licence	-4.43741			-0.448779				0.063404	-0.0255541	-0.155606				59.1845	7.41e-14	0.242296
Resident licence	-4.44677			-0.452181				0.0248726		-0.167097			-0.0200423	59.3906	6.68e-14	0.242057
Resident licence	-4.3772	0.2532	-0.00841132	-0.531399				0.104932	-0.0796709				0.0274072	59.8037	5.44e-14	0.256467
Resident licence	-4.46314			-0.52687								-0.113972	0.0175071	59.8356	5.35e-14	0.233985
Resident licence	-4.44334			-0.529034				0.0190399				-0.100386		59.8848	5.22e-14	0.233928
Resident licence	-4.36498			-0.496115				0.142788	-0.0629121					60.0969	4.69e-14	0.233679
Resident licence	-4.50629	0.268147	-0.0240907	-0.567661				-0.045202				-0.123948	0.0781203	60.186	4.49e-14	0.256032
Resident licence	-4.49082	0.229812		-0.515084				0.0115869	-0.0457164	-0.10958		-0.0986647	0.0620313	60.3619	4.11e-14	0.263172
Resident licence	-4.92407	0.245754				-0.522398	0.235552	-0.195028		-0.528312	0.186203			61.0816	2.87e-14	0.255013
Resident licence	-4.52244	0.25219	-0.0247772	-0.520454				-0.054522		-0.129727		-0.10851	0.067842	61.1672	2.75e-14	0.262265
Resident licence	-4.40609	0.23767	-0.0192572	-0.511334				0.0297519	-0.0487174	-0.113125		-0.0668233		61.4305	2.41e-14	0.261968
Resident licence	-4.87617	0.25025				-0.579034	0.232957			-0.489461	0.169568			62.1278	1.7e-14	0.246386
Resident licence	-4.82319	0.280753				-0.522885	0.226192	-0.0587525	-0.101301	-0.49263	0.198353			62.2676	1.59e-14	0.261022
Resident licence	-4.42682	0.240922	-0.0131302	-0.49684				0.0530074	-0.0499801	-0.116137			0.0262899	62.3515	1.52e-14	0.260927
Resident licence	-4.41			-0.51071				0.0543899					-0.0197191	62.4343	1.46e-14	0.230936
Resident licence	-4.91714	0.245315				-0.579428	0.272194			-0.514153	0.173413	0.155181		62.7239	1.26e-14	0.253139
Resident licence	-4.43174	0.264182	-0.0141015	-0.551323				0.0550869	-0.0706476			-0.108207	0.0650451	63.7581	7.53e-15	0.259336
Resident licence	-4.45105			-0.467953				0.0307644	-0.0228076	-0.149771		-0.0823351		63.8977	7.02e-15	0.244344
Resident licence	-4.48546			-0.469778				-0.00542631		-0.15928		-0.0890801	0.00909783	64.1708	6.12e-15	0.244028
Resident licence	-4.38369			-0.515555				0.102639	-0.058217			-0.0940796		64.2225	5.97e-15	0.236437
Resident licence	-4.9442	0.243931				-0.532941	0.263781	-0.157698		-0.537278	0.18535	0.114668		64.6084	4.92e-15	0.258372
Resident licence	-4.4114			-0.451078				0.0669857	-0.0283507	-0.154354			-0.0244728	65.4148	3.29e-15	0.242589
Resident licence	-4.99075	0.270459				-0.536436	0.239685	-0.193813		-0.520744	0.182879		0.0682991	65.6529	2.92e-15	0.257187
Resident licence	-4.84486	0.27742				-0.530916	0.252223	-0.0283305	-0.0977509	-0.502684	0.197265	0.107319		66.1723	2.25e-15	0.26393
Resident licence	-4.33339			-0.497971				0.146342	-0.0661272				-0.0301482	66.1954	2.22e-15	0.23413
Resident licence	-4.45971			-0.528928				0.0162365				-0.109446	0.016164	66.2736	2.14e-15	0.234038
Resident licence	-4.47543	0.251847	-0.0181442	-0.517464				0.00860137	-0.0429801	-0.110859		-0.100966	0.0614725	66.6747	1.75e-15	0.263364
Resident licence	-4.94293	0.274525				-0.591227	0.236837			-0.482795	0.166366		0.0686473	66.6842	1.74e-15	0.248603
Resident licence	-4.91255	0.262513	-0.013316			-0.522702	0.236581	-0.195441		-0.530077	0.186949			67.4643	1.18e-15	0.255127
Resident licence	-4.87896	0.296243				-0.532166	0.229231	-0.067663	-0.0937561	-0.489992	0.194889		0.0502795	67.7492	1.02e-15	0.262153
Resident licence	-4.86733	0.263062	-0.0102437			-0.579454	0.233803			-0.490936	0.170126			68.551	6.85e-16	0.246455
Resident licence	-4.82453	0.278498	0.00185466			-0.522854	0.22604	-0.0583458	-0.101606	-0.492323	0.198285			68.749	6.21e-16	0.261024
Resident licence	-4.9312	0.251456				-0.582709	0.270726			-0.510956	0.172441	0.145584	0.0168703	69.1172	5.16e-16	0.253242
Resident licence	-4.91319	0.251069	-0.0045242			-0.579755	0.272522			-0.514716	0.173645	0.154823		69.1952	4.96e-16	0.253153
Resident licence	-4.74885	0.281333				-0.71605	0.288497			-0.290916				69.816	3.64e-16	0.229878
Resident licence	-4.45594			-0.468134				0.0292117	-0.0222248	-0.149821		-0.0847624	0.0042273	70.3747	2.75e-16	0.244351
Resident licence	-4.38644			-0.515435				0.101718	-0.0578638			-0.0954339	0.00237163	70.7038	2.33e-16	0.236439
Resident licence	-4.97481	0.256972				-0.538279	0.260281	-0.164487		-0.531453	0.18379	0.0920027	0.0353738	70.7057	2.33e-16	0.25881
Resident licence	-4.89844					-0.32909	0.20033	-0.19571		-0.588738	0.211658			70.8872	2.13e-16	0.236225
Resident licence	-4.78583	0.278425				-0.721566	0.328468			-0.308035		0.147147		71.0015	2.01e-16	0.236091
Resident licence	-4.93666	0.254909	-0.00862594			-0.533256	0.264306	-0.158281		-0.538326	0.185832	0.113808		71.0493	1.96e-16	0.25842
Resident licence	-4.77923	0.278922				-0.681284	0.29706	-0.155206		-0.30518				71.5244	1.55e-16	0.23548
Resident licence	-4.98193	0.282034	-0.00937066			-0.536678	0.240448	-0.194166		-0.522041	0.183419		0.0674941	72.0867	1.17e-16	0.257243
Resident licence	-4.85128					-0.382963	0.198476			-0.553057	0.195524			72.1052	1.16e-16	0.227178
Resident licence	-4.89367					-0.384753	0.237528			-0.578834	0.200394	0.159014		72.4017	9.99e-17	0.234454
Resident licence	-4.85926	0.282187				-0.533045	0.250869	-0.0334778	-0.0958973	-0.500985	0.196348	0.0981674	0.0146543	72.5913	9.09e-17	0.264002
Resident licence	-4.84963	0.269328	0.0065906			-0.53069	0.251778	-0.0265818	-0.0988649	-0.501647	0.197028	0.108007		72.6322	8.9e-17	0.263956
Resident licence	-4.93736	0.281737	-0.00588732			-0.591503	0.237349			-0.483672	0.166694		0.0680949	73.1477	6.88e-17	0.248626
Resident licence	-4.82719	0.308582				-0.727826	0.292476			-0.287727			0.0771895	73.8555	4.83e-17	0.23275
Resident licence	-4.88176	0.291878	0.00362349			-0.532078	0.228912	-0.0668799	-0.0943217	-0.489383	0.194748		0.0504753	74.2253	4.01e-17	0.262161
Resident licence	-4.91898					-0.339817	0.2282	-0.156499		-0.598751	0.211517	0.116867		74.3211	3.83e-17	0.239777
Resident licence	-4.70905							-0.215923		-0.634093	0.260381			74.3656	3.74e-17	0.216776
Resident licence	-4.69588	0.306767				-0.690045	0.296568	-0.0460989	-0.0785467	-0.266764				74.7578	3.08e-17	0.23927
Resident licence	-4.71177	0.128348						-0.25068		-0.630686	0.264748			74.7849	3.03e-17	0.224005
Resident licence	-4.80139	0.277892				-0.693207	0.326975	-0.118774		-0.314932		0.118076		74.843	2.95e-17	0.23917
Resident licence	-4.61767	0.157264						-0.111581	-0.106386	-0.598758	0.279046			75.2397	2.42e-17	0.231125
Resident licence	-4.85898	0.307049				-0.695019	0.301548	-0.154767		-0.302003			0.0778958	75.514	2.11e-17	0.238389
Resident licence	-4.92762	0.256129	-0.00371403			-0.582876	0.271009			-0.511412	0.172607	0.145452	0.0165644	75.5924	2.03e-17	0.253251
Resident licence	-4.59612	0.233964				-0.159765		-0.03417	-0.12082	-0.542274	0.260436			75.7912	1.83e-17	0.238067
Resident licence	-4.84206					-0.313568	0.191125	-0.123233	-0.0518536	-0.573026	0.21935			75.8545	1.78e-17	0.237993
Resident licence	-4.74711	0.283737	-0.00190561			-0.716211	0.288689			-0.291037				76.2969	1.42e-17	0.229881
Resident licence	-4.7025	0.192632				-0.135152		-0.200057		-0.583751	0.245574			76.899	1.05e-17	0.229171
Resident licence	-4.96797	0.266161	-0.00735395			-0.53851	0.260785	-0.164924		-0.532417	0.184215	0.0915229	0.0348919	77.1582	9.26e-18	0.258845
Resident licence	-4.81337	0.289775				-0.726078	0.325124			-0.304465		0.129061	0.0314805	77.171	9.2e-18	0.236457
Resident licence	-4.90552					-0.328133	0.200267	-0.195436		-0.588552	0.211598		0.00769108	77.344	8.44e-18	0.236255
Resident licence	-4.63902							-0.105949	-0.077874	-0.610324	0.270179			77.3879	8.26e-18	0.22091
Resident licence	-4.78897	0.274047	0.00339647			-0.721181	0.328165			-0.307897		0.14741		77.4784	7.89e-18	0.236098
Resident licence	-4.85143					-0.391781	0.24539			-0.584405	0.201463	0.189118	-0.0538504	77.8673	6.5e-18	0.235644
Resident licence	-4.65508	0.197929				-0.195044				-0.541144	0.227679			77.8762	6.47e-18	0.220328
Resident licence	-4.77557	0.283997	-0.00399317			-0.681557	0.297451	-0.155318		-0.30538				77.9983	6.09e-18	0.235491
Resident licence	-4.65743									-0.60819	0.251774			78.0569	5.91e-18	0.204496
Resident licence	-4.72023	0.304223				-0.69945	0.324339	-0.0169215	-0.0746626	-0.277594		0.112065		78.3974	4.98e-18	0.24257
Resident licence	-4.86					-0.381565	0.198417			-0.552979	0.195473		0.00942645	78.5488	4.62e-18	0.227224
Resident licence	-4.86432	0.273918	0.00677242			-0.532851	0.250404	-0.0316918	-0.0970248	-0.499929	0.196101	0.0988023	0.0148069	79.0499	3.6e-18	0.26403
Resident licence	-4.86487					-0.323844	0.218319	-0.0891244	-0.0489506	-0.584024	0.218927	0.113796		79.4591	2.93e-18	0.241339
Resident licence	-4.77157	0.327011				-0.699583	0.299669	-0.0580587	-0.0693854	-0.268904			0.0651364	79.546	2.81e-18	0.241239
Resident licence	-4.8867					-0.346549	0.234531	-0.149474		-0.60197	0.211746	0.141749	-0.0396319	80.2609	1.96e-18	0.240409
Resident licence	-4.82963	0.305515	0.00245837			-0.727588	0.292214			-0.287576			0.0774101	80.3355	1.89e-18	0.232754
Resident licence	-4.75322	0.140138						-0.250541		-0.62814	0.264157		0.0442159	80.4532	1.78e-18	0.224971
Resident licence	-4.70662							-0.19928		-0.636118	0.260705	0.0362817		80.4888	1.75e-18	0.217207
Resident licence	-4.70686					-0.0296754		-0.201484		-0.6247	0.255624			80.5605	1.69e-18	0.217121
Resident licence	-4.70855	0.131634						-0.229125		-0.63353	0.265345	0.0491105		80.6022	1.66e-18	0.224794
Resident licence	-4.84316	0.294673				-0.69845	0.321987	-0.127707		-0.310331		0.088503	0.0462172	80.6665	1.6e-18	0.239937
Resident licence	-4.71996							-0.215019		-0.633403	0.260089		0.0117508	80.7882	1.51e-18	0.216849
Resident licence	-4.61284	0.160803						-0.0847113	-0.108062	-0.602161	0.280229	0.0556561		80.8753	1.44e-18	0.23212
Resident licence	-4.69861	0.14584	-0.0136958					-0.250593		-0.632012	0.265207			81.1621	1.25e-18	0.22413
Resident licence	-4.70224	0.296486	0.00840543			-0.689663	0.295803	-0.0441462	-0.0799502	-0.265829				81.2029	1.23e-18	0.239314
Resident licence	-4.65489	0.0926851								-0.603107	0.254661			81.3233	1.15e-18	0.208399
Resident licence	-4.80175	0.277082	0.000596864			-0.692853	0.326763	-0.118948		-0.314529		0.118116		81.3259	1.15e-18	0.239171
Resident licence	-4.64602	0.163573						-0.115745	-0.10291	-0.598283	0.278002		0.0271813	81.4236	1.1e-18	0.231476
Resident licence	-4.66186									-0.621002	0.254678	0.0972193		81.5221	1.04e-18	0.208159
Resident licence	-4.63464	0.244799				-0.163662		-0.0388586	-0.116415	-0.540147	0.258571		0.0374358	81.7219	9.46e-19	0.23871
Resident licence	-4.61804	0.156706	0.000435757					-0.111517	-0.106454	-0.59871	0.27904			81.7227	9.45e-19	0.231125
Resident licence	-4.65932					-0.0854224				-0.585056	0.238428			81.8071	9.06e-19	0.207814
Resident licence	-4.85899	0.30703	3.41e-06			-0.695009	0.301542	-0.154771		-0.301999			0.0779066	81.9971	8.24e-19	0.238389
Resident licence	-4.75391	0.210873				-0.142187		-0.198572		-0.578189	0.24401		0.0551673	82.1478	7.64e-19	0.230625
Resident licence	-4.60416	0.222398	0.0097094			-0.160901		-0.0321771	-0.122249	-0.540538	0.260078			82.2241	7.36e-19	0.238125
Resident licence	-4.59535	0.232781				-0.155051		-0.0298186	-0.120808	-0.544205	0.261154	0.0139992		82.2262	7.35e-19	0.238123
Resident licence	-4.83515					-0.314088	0.191037	-0.12171	-0.0531168	-0.572805	0.2196		-0.00614041	82.3215	7.01e-19	0.238012
Resident licence	-4.70777	0.216343				-0.200907				-0.536279	0.226185		0.0563897	83.0725	4.81e-19	0.221861
Resident licence	-4.70188	0.19154				-0.130851		-0.195886		-0.585806	0.246322	0.0131095		83.3391	4.21e-19	0.229222
Resident licence	-4.69609	0.200852	-0.0067728			-0.134411		-0.200412		-0.584825	0.245948			83.3565	4.18e-19	0.229202
Resident licence	-4.63556							-0.0859811	-0.0788493	-0.612629	0.270815	0.0403741		83.4299	4.03e-19	0.221435
Resident licence	-4.65707	0.19232				-0.171383				-0.554567	0.232758	0.0554289		83.5322	3.82e-19	0.221313
Resident licence	-4.63654					-0.0318488		-0.0899182	-0.0782777	-0.600583	0.265427			83.546	3.8e-19	0.221297
Resident licence	-4.81804	0.283813	0.00472149			-0.725568	0.324657			-0.304224		0.129251	0.0318447	83.6422	3.62e-19	0.236471
Resident licence	-4.65942	0.106555								-0.617892	0.258431	0.113329		83.7477	3.43e-19	0.213297
Resident licence	-4.63264							-0.10504	-0.0788973	-0.610367	0.270491		-0.00592134	83.8558	3.25e-19	0.220928
Resident licence	-4.65291	0.200672	-0.00228553			-0.194815				-0.54153	0.227803			84.3562	2.53e-19	0.220332
Resident licence	-4.67522									-0.607373	0.251261		0.0189392	84.3809	2.5e-19	0.20469
Resident licence	-4.69701					-0.509272	0.255001			-0.330145				84.4717	2.39e-19	0.204579
Resident licence	-4.75276	0.314435				-0.70247	0.320797	-0.0279855	-0.0709274	-0.276428		0.0922121	0.0317555	84.5755	2.27e-19	0.242923
Resident licence	-4.72999	0.28824	0.0129338			-0.698615	0.323318	-0.0133542	-0.0768885	-0.276249		0.113274		84.7906	2.04e-19	0.242674
Resident licence	-4.80704					-0.330839	0.225926	-0.0648805	-0.0595205	-0.585606	0.221035	0.149001	-0.0575944	84.8592	1.97e-19	0.242595
Resident licence	-4.73326					-0.515296	0.293875			-0.346678		0.146887		85.685	1.3e-19	0.210963
Resident licence	-4.77965	0.314406	0.0102968			-0.698577	0.298457	-0.0560987	-0.0709297	-0.267393			0.0655714	85.9724	1.13e-19	0.241304
Resident licence	-4.72644					-0.47577	0.26252	-0.15312		-0.342461				86.2585	9.79e-20	0.210271
Resident licence	-4.74078	0.139158						-0.237008		-0.630598	0.2647	0.0311827	0.0330539	86.7233	7.76e-20	0.225223
Resident licence	-4.70549					-0.0216154		-0.191998		-0.628816	0.257177	0.0291644		86.8327	7.34e-20	0.217374
Resident licence	-4.74222	0.153124	-0.0103811					-0.250539		-0.629218	0.264526		0.0431177	86.876	7.19e-20	0.225042
Resident licence	-4.66197					-0.0589804				-0.601025	0.244699	0.0724553		86.8771	7.18e-20	0.209523
Resident licence	-4.70541							-0.199046		-0.636234	0.260741	0.0369782	-0.00124895	86.9713	6.85e-20	0.217208
Resident licence	-4.71639					-0.0289222		-0.201114		-0.624362	0.255505		0.0101855	86.9985	6.76e-20	0.217175
Resident licence	-4.69565	0.104597								-0.600892	0.253908		0.0436707	87.0094	6.72e-20	0.209363
Resident licence	-4.69892	0.144485	-0.0101364					-0.229792		-0.63446	0.265676	0.0475947		87.0279	6.66e-20	0.224862
Resident licence	-4.84516	0.292067	0.00204317			-0.698267	0.321792	-0.127599		-0.310234		0.0886314	0.0463501	87.1474	6.27e-20	0.23994
Resident licence	-4.62193	0.162415						-0.0881991	-0.106864	-0.601731	0.279807	0.05116	0.00832968	87.3369	5.71e-20	0.232146
Resident licence	-4.61715	0.154273	0.00526079					-0.0834575	-0.108866	-0.601561	0.280152	0.0565571		87.3437	5.69e-20	0.232138
Resident licence	-4.64219	0.109518	-0.0132495							-0.604534	0.255063			87.7056	4.75e-20	0.208521
Resident licence	-4.64252									-0.623277	0.255474	0.107407	-0.0209479	87.8483	4.42e-20	0.208349
Resident licence	-4.64789	0.161095	0.00200228					-0.115474	-0.103178	-0.598042	0.277959		0.027357	87.9047	4.3e-20	0.231479
Resident licence	-4.64578	0.230655	0.012112			-0.16517		-0.0364571	-0.118055	-0.537902	0.258057		0.0385204	88.1274	3.84e-20	0.2388
Resident licence	-4.63998	0.24727				-0.167991		-0.0437634	-0.115764	-0.537707	0.257525	-0.0122155	0.042108	88.1775	3.75e-20	0.238742
Resident licence	-4.67038					-0.0842159				-0.58486	0.238321		0.0117855	88.2299	3.65e-20	0.207887
Resident licence	-4.76539	0.216927				-0.152868		-0.207505		-0.572757	0.242074	-0.0288293	0.0660656	88.478	3.23e-20	0.230805
Resident licence	-4.75155	0.213525	-0.00225108			-0.141914		-0.198709		-0.578575	0.244142		0.0549178	88.628	2.99e-20	0.230628
Resident licence	-4.60411	0.219921	0.0106844			-0.155812		-0.0271046	-0.122394	-0.542527	0.260849	0.0154746		88.6489	2.96e-20	0.238193
Resident licence	-4.69847	0.209655				-0.187261				-0.544337	0.229193	0.0296278	0.0452271	89.3737	2.06e-20	0.222077
Resident licence	-4.71074	0.213121	0.00276053			-0.201195				-0.535795	0.226028		0.0567485	89.5518	1.89e-20	0.221865
Resident licence	-4.74753					-0.487379	0.291292	-0.115867		-0.351805		0.117148		89.6554	1.79e-20	0.213989
Resident licence	-4.6062							-0.07468	-0.0836327	-0.613697	0.272403	0.0549506	-0.0261083	89.6834	1.77e-20	0.221709
Resident licence	-4.51941	0.375751				-0.716807	0.278039	0.0962399	-0.158504					89.6991	1.75e-20	0.213936
Resident licence	-4.63434					-0.0225795		-0.0784068	-0.0789	-0.604937	0.26722	0.0331019		89.7611	1.7e-20	0.221616
Resident licence	-4.69615	0.198995	-0.00608761			-0.13043		-0.196444		-0.586657	0.246616	0.0123768		89.8017	1.66e-20	0.229246
Resident licence	-4.62801					-0.0324876		-0.0883406	-0.0796473	-0.60045	0.26575		-0.00787779	90.0027	1.51e-20	0.221328
Resident licence	-4.65765	0.19158	0.000605208			-0.171408				-0.554488	0.232733	0.055492		90.0152	1.5e-20	0.221314
Resident licence	-4.65558	0.111559	-0.00399256							-0.618283	0.258548	0.112781		90.2216	1.35e-20	0.213308
Resident licence	-4.66202	0.107137								-0.617576	0.258343	0.112032	0.00283148	90.2282	1.34e-20	0.2133
Resident licence	-4.70617					-0.507723	0.254966			-0.33016			0.00982792	90.9122	9.55e-21	0.204631
Resident licence	-4.76292	0.298141	0.0132142			-0.701535	0.31969	-0.0244141	-0.0731409	-0.275021		0.0934223	0.0319547	90.9654	9.3e-21	0.243031
Resident licence	-4.69378					-0.52326	0.301739			-0.350117		0.17524	-0.0495727	91.3082	7.84e-21	0.212
Resident licence	-4.69702					-0.470606	0.260042	-0.117462	-0.0245932	-0.33044				92.3917	4.56e-21	0.210693
Resident licence	-4.73447					-0.474545	0.262465	-0.152868		-0.342412			0.00864105	92.7085	3.89e-21	0.210311
Resident licence	-4.64367	0.344138				-0.728566	0.269705							92.8325	3.66e-21	0.194345
Resident licence	-4.73179	0.150313	-0.0088937					-0.237501		-0.631454	0.265001	0.0300927	0.032497	93.1623	3.1e-21	0.225275
Resident licence	-4.64771					-0.0573498				-0.603181	0.245551	0.0806272	-0.015442	93.2752	2.93e-21	0.209626
Resident licence	-4.70594					-0.0216564		-0.192072		-0.628768	0.257157	0.0288834	0.000470239	93.3158	2.87e-21	0.217374
Resident licence	-4.68549	0.116316	-0.00947271							-0.601979	0.254222		0.0425018	93.4415	2.7e-21	0.209425
Resident licence	-4.6265	0.155746	0.00539019					-0.0869659	-0.107667	-0.601108	0.27972	0.0520226	0.00846804	93.8046	2.25e-21	0.232164
Resident licence	-4.65008	0.233372	0.0116618			-0.168932		-0.0409173	-0.117405	-0.535807	0.257141	-0.0107972	0.0425991	94.589	1.52e-21	0.238825
Resident licence	-4.58626	0.394204				-0.724907	0.279778	0.0852879	-0.150251				0.0586538	94.8052	1.36e-21	0.215589
Resident licence	-4.53243	0.375743				-0.725682	0.297224	0.118556	-0.158083			0.0753746		94.8293	1.35e-21	0.215561
Resident licence	-4.7623	0.220565	-0.0030439			-0.152594		-0.207764		-0.573228	0.242236	-0.0290864	0.0658289	94.9559	1.26e-21	0.230811
Resident licence	-4.71532					-0.49498	0.297775	-0.109067		-0.354218		0.142017	-0.0393632	95.6034	9.15e-22	0.214631
Resident licence	-4.70206	0.205661	0.00338555			-0.187536				-0.543787	0.229019	0.0297963	0.0456073	95.8509	8.08e-22	0.222084
Resident licence	-4.72195					-0.482728	0.288728	-0.0855449	-0.02109	-0.3417		0.11547		95.8856	7.95e-22	0.214293
Resident licence	-4.53854	0.348122	0.0225088			-0.71588	0.275939	0.0996341	-0.161058					95.9053	7.87e-22	0.214269
Resident licence	-4.6068					-0.0204358		-0.0684269	-0.0833994	-0.606588	0.269051	0.0475456	-0.0245825	96.0432	7.34e-22	0.221855
Resident licence	-4.7333	0.373153				-0.743724	0.274252						0.0867948	96.2008	6.79e-22	0.198173
Resident licence	-4.65802	0.111885	-0.00384702							-0.617986	0.258466	0.111656	0.00250057	96.7028	5.28e-22	0.21331
Resident licence	-4.66586	0.343998				-0.737079	0.296432					0.0937889		97.0647	4.41e-22	0.197113
Resident licence	-4.65939	0.343198				-0.708829	0.274585	-0.0960692						97.5551	3.45e-22	0.196511
Resident licence	-4.69991					-0.470701	0.260226	-0.117561	-0.0242517	-0.330992			0.0024614	98.8722	1.78e-22	0.210696
Resident licence	-4.65151	0.333906	0.00840248			-0.727972	0.268783							99.2776	1.46e-22	0.194392
Resident licence	-4.75203	0.373228				-0.724801	0.279663	-0.0993343					0.0887781	100.769	6.91e-23	0.200517
Resident licence	-4.57396	0.388266				-0.728151	0.292076	0.103512	-0.152509			0.0510695	0.0400707	100.82	6.74e-23	0.216151
Resident licence	-4.55484	0.343263	0.0263067			-0.724402	0.295276	0.123737	-0.16119			0.0782499		100.937	6.36e-23	0.21601
Resident licence	-4.38735	0.217161				-0.251389				-0.254659				100.959	6.29e-23	0.184272
Resident licence	-4.60822	0.364314	0.0245251			-0.723524	0.277248	0.0889324	-0.15283				0.0599037	100.962	6.28e-23	0.21598
Resident licence	-4.67301					-0.49045	0.29587	-0.0655966	-0.0293771	-0.340706		0.144955	-0.0478848	101.618	4.52e-23	0.215194
Resident licence	-4.7267	0.366486				-0.745709	0.289126					0.0560603	0.0674508	102.058	3.63e-23	0.198941
Resident licence	-4.67407	0.343424				-0.72031	0.295672	-0.0734726				0.0782226		102.569	2.81e-23	0.198314
Resident licence	-4.74665	0.357152	0.0132917			-0.742548	0.272667						0.0879034	102.59	2.78e-23	0.198289
Resident licence	-4.67657	0.329971	0.0114117			-0.736075	0.295288					0.0945147		103.478	1.78e-23	0.197199
[truncated: 702 more rows]
